1 **The multi-peak adaptive landscape of crocodylomorph body size**  
2 **evolution**

3

4

5

6 Pedro L. Godoy<sup>1\*†</sup>, Roger B. J. Benson<sup>2</sup>, Mario Bronzati<sup>3</sup> & Richard J. Butler<sup>1</sup>

7

8

9

10

11

12 <sup>1</sup>School of Geography, Earth and Environmental Sciences, University of Birmingham, UK.

13 <sup>2</sup>Department of Earth Sciences, University of Oxford, UK.

14 <sup>3</sup>Laboratório de Paleontologia de Ribeirão Preto, FFCLRP, Universidade de São Paulo, Ribeirão  
15 Preto, Brazil.

16

17 \* corresponding author

18 † current address: Department of Anatomical Sciences, Stony Brook University, Stony Brook,  
19 NY, 11794, USA

20

21

22

23

24

25

26

27 **Abstract**

28 Background: Little is known about the long-term patterns of body size evolution in  
29 Crocodylomorpha, the > 200-million-year-old group that includes living crocodylians  
30 and their extinct relatives. Extant crocodylians are mostly large-bodied (3–7 m)  
31 predators. However, extinct crocodylomorphs exhibit a wider range of phenotypes, and  
32 many of the earliest taxa were much smaller (< 1.2 m). This suggests a pattern of size  
33 increase through time that could be caused by multi-lineage evolutionary trends of size  
34 increase or by selective extinction of small-bodied species. In this study, we characterise  
35 patterns of crocodylomorph body size evolution using a model fitting-approach (with  
36 cranial measurements serving as proxies). We also estimate body size disparity through  
37 time and quantitatively test hypotheses of biotic and abiotic factors as potential drivers  
38 of crocodylomorph body size evolution.

39  
40 Results: Crocodylomorphs reached an early peak in body size disparity during the Late  
41 Jurassic, and underwent essentially continually decreases in disparity since then. A  
42 multi-peak Ornstein-Uhlenbeck model outperforms all other evolutionary models fitted  
43 to our data (including both uniform and non-uniform), indicating that the  
44 macroevolutionary dynamics of crocodylomorph body size are better described within  
45 the concept of an adaptive landscape, with most body size variation emerging after  
46 shifts to new macroevolutionary regimes (analogous to adaptive zones). We did not find  
47 support for a consistent evolutionary trend towards larger sizes among lineages (i.e.,  
48 Cope's rule), or strong correlations of body size with climate. Instead, the intermediate  
49 to large body sizes of some crocodylomorphs are better explained by group-specific  
50 adaptations. In particular, the evolution of a more aquatic lifestyle (especially marine)  
51 correlates with increases in average body size, though not without exceptions.

52

53 Conclusions: Shifts between macroevolutionary regimes provide a better explanation of  
54 crocodylomorph body size evolution than do climatic factors, suggesting a central role  
55 for lineage-specific adaptations rather than climatic forcing. Shifts leading to larger  
56 body sizes occurred in most aquatic and semi-aquatic groups. This, combined with  
57 extinctions of groups occupying smaller body size regimes (particularly during the Late  
58 Cretaceous and Cenozoic), gave rise to the upward-shifted body size distribution of  
59 extant crocodylomorphs compared to their smaller-bodied terrestrial ancestors.

60

61 **Keywords:** Crocodylomorpha, Crocodyliformes, body size evolution, adaptive  
62 landscape, phylogenetic comparative methods, Ornstein–Uhlenbeck models.

63

64

65

66

## 67 **Background**

68 Body size influences many aspects of ecology, physiology and evolutionary history [1,  
69 2, 3, 4, 5, 6], and patterns of animal body size evolution are a long-standing subject of  
70 macroevolutionary investigation (e.g., [7, 8, 9, 10, 11]). As a major focus of natural  
71 selection, it is expected that significant variation should occur in the body size of  
72 animals, although confined within biological constraints, such as skeletal structure,  
73 thermoregulation and resource availability [4, 5, 12]. Furthermore, body size can often  
74 be easily measured or estimated from both fossil and modern specimens, and has  
75 therefore been widely used in phenotypic macroevolutionary studies [5, 7, 8, 9, 11, 13,  
76 14, 15, 16, 17].

77           With few exceptions (e.g., [18, 19]), previous studies of tetrapod body size  
78 evolution have focused on mammals (e.g., [14, 15, 16, 20, 21, 22, 23, 24]) and  
79 dinosaurs or birds (e.g., [25, 26, 27, 28, 29, 30, 31, 32, 33]). Little is known, however,  
80 about other diverse and morphologically disparate clades. Among those,  
81 Crocodylomorpha represents an excellent group for studying large-scale evolutionary  
82 patterns, with a rich and well-studied fossil record covering more than 200 million  
83 years, as well as living representatives [34, 35, 36]. Previous work has investigated  
84 multiple aspects of crocodylomorph macroevolution, including spatial and temporal  
85 patterns of diversity [35, 36, 37], as well as morphological variation, disparity, and  
86 evolution, with a particular focus on the skull [38, 39, 40, 41, 42, 43, 44].

87           Nevertheless, studies quantitatively investigating macroevolutionary patterns of  
88 body size in crocodylomorphs have been restricted to particular time periods (e.g.,  
89 Triassic-Jurassic body size disparity [45]) or clades (e.g., metriorhynchids [46]),  
90 limiting broader interpretations. For instance, the impact of environmental temperature  
91 on the growth and adult body size of animals has long been acknowledged as an  
92 important phenomenon [4] and has been considered to have a significant influence on  
93 the physiology and distribution of crocodylians [47, 48]. There is also strong evidence  
94 for climate-driven biodiversity patterns in the group (e.g., [36, 37]). Nevertheless, it  
95 remains unclear whether extrinsic factors, such as temperature and geographic  
96 distribution, have impacted long-term patterns of crocodylomorph body size evolution  
97 [49].

98           Most of the earliest crocodylomorphs, such as *Litargosuchus* and  
99 *Hesperosuchus*, were small-bodied animals (with estimated total lengths of less than 1  
100 metre [50, 51]), contrasting with some giant forms that appeared later, such as  
101 *Sarcosuchus* and *Deinosuchus* (possibly more than 10 metres long [52, 53]), as well as

102 with the intermediate to large sizes of extant crocodylians (1.5–7 m [54, 55]). The  
103 absence of small-bodied forms among extant species raises questions about what long-  
104 term macroevolutionary process (or processes) gave rise to the prevalence of larger  
105 body sizes observed in the present. Directional trends of increasing body size through  
106 time (see [56]), differential extinction of small bodied taxa, or other factors, such as  
107 climate- or environment-driven evolutionary change could explain this. However,  
108 because patterns of body size evolution along phylogenetic lineages of  
109 crocodylomorphs have not been characterised, its causes are unaddressed.

110

### 111 *Model-fitting approach*

112 Since the end of the last century, palaeontologists have more frequently used  
113 quantitative comparative methods to investigate the tempo and mode of evolution along  
114 phylogenetic lineages [57, 58, 59], including studies of body size evolution [5, 14, 27,  
115 29, 15, 60]. More recently, numerous studies have employed a phylogeny-based model-  
116 fitting approach, using a maximum-likelihood or Bayesian framework to identify the  
117 best-fitting statistical macroevolutionary model for a given phylogenetic comparative  
118 dataset [31, 33, 61, 62, 63, 64, 65]. Many of those works have tested the fit of a uniform  
119 macroevolutionary model, with a single set of parameters applied across all branches of  
120 a phylogeny (e.g., [46, 64, 66, 67]). Uniform models are important for describing many  
121 aspects of phenotypic evolution and are often the null hypothesis in such studies.  
122 However, if the dynamics of evolutionary trends vary in more complex ways through  
123 time and space and among clades and environments [e.g., 68, 69, 70, 71, 72], then  
124 uniform models might not be adequate to characterise this variation.

125       Because we aim to characterise variation in body size among many subgroups  
126 inhabiting different environments and encompassing substantial variation in

127 morphology, we approach the study of crocodylomorph body size evolution using non-  
128 uniform models. We focus on the concept of a Simpsonian Adaptive Landscape [73,  
129 74], which has proved to be a fruitful conceptual framework for characterizing  
130 macroevolutionary changes, encompassing ideas such as adaptive zone invasion and  
131 quantum evolution [71, 75, 76]. Macroevolutionary landscapes provide a conceptual  
132 bridge for dialogues between studies of micro- and macroevolution, and have benefitted  
133 from the subsequent advancements of molecular biology and genetics [77]. Within this  
134 paradigm, uniform models primarily represent static macroevolutionary landscapes,  
135 with unchanged peaks (or maximum adaptive zones [11]) persisting through long time  
136 intervals and across the phylogeny [71, 74, 75].

137         Incorporating biological realism into statistical models of evolution is  
138 challenging [78]. Many existing models are based on a Brownian motion (BM) process  
139 resulting from random walks of trait values along independent phylogenetic lineages  
140 [57, 75, 79]. Uniform Brownian motion has many interpretations. For example, it can be  
141 used as a model of drift, or of adaptive evolution towards lineage-specific selective  
142 optima that undergo random walks through time, and seems reasonable for describing  
143 undirected and unconstrained stochastic change [57]. Elaborations of BM models  
144 include the “trend” model, which incorporates a tendency for directional evolution by  
145 adding a parameter  $\mu$  [80]. The multi-regime “trend-shift” model has also been proposed,  
146 in which the trend parameter ( $\mu$ ) undergoes clade-specific or time-specific shifts (G.  
147 Hunt in [33]).

148         The Ornstein–Uhlenbeck (OU) process [58, 61, 64, 81, 82] is a modification of  
149 Brownian motion that incorporates attraction ( $\alpha$ ) to a trait ‘optimum’ ( $\theta$ ). OU models  
150 describe the evolution of a trait towards or around a stationary peak or optimum value,  
151 at a given evolutionary rate. Thus, multi-regime OU models can account for the

152 existence of multiple macroevolutionary regimes (similar to adaptive zones, in the  
153 Simpsonian Adaptive Landscape paradigm). Even though many OU-based models  
154 typically require *a priori* adaptive hypotheses for inferring the trait optima of regimes  
155 [61], more recent methods attempt to solve this problem by estimating location, values  
156 and magnitudes of regime shifts without *a priori* designation of selective regimes [71,  
157 78, 83]. In particular, the SURFACE method [83] aims to identify shifts in  
158 macroevolutionary regimes, identified using AICc (Akaike’s information criterion for  
159 finite sample sizes [84]). Originally designated to identify “convergent” trait evolution  
160 across phylogenetic lineages, the SURFACE algorithm makes use of a multi-peak OU-  
161 model and can be a tool to determine heterogeneity of macroevolutionary landscapes  
162 [33, 85, 86]. In this work, we employ a model-fitting approach, using non-uniform  
163 macroevolutionary OU-based models (SURFACE), to characterize the adaptive  
164 landscape of body size evolution in Crocodylomorpha. This represents the first  
165 comprehensive investigation of large-scale patterns of body size evolution across the  
166 entire evolutionary history of crocodylomorphs.

167

## 168 **Methods**

### 169 *Proxy for body size*

170 Extinct Crocodylomorpha are morphologically diverse, and frequently known from  
171 incomplete remains. Therefore, precise estimation of their body sizes, and those of  
172 comparable fossil groups, can be challenging (see [87, 88] for related considerations).  
173 There are many methods and equations for estimating crocodylomorph body size (either  
174 body mass or length) available in the literature. The most frequently used equations are  
175 derived from linear regressions based on specimens of modern species, using both

176 cranial [53, 89, 90, 91, 92, 93] and postcranial [94, 95] measurements as proxies, even  
177 though some inaccuracy is expected (see Additional file 1 for further discussion).

178         We sought an appropriate proxy for studying body size across all  
179 crocodylomorph evolutionary history that also maximised available sample size, to  
180 allow as comprehensive a study of evolutionary history as possible. Thus, we decided to  
181 use two cranial measurements as proxies for total body length: total dorsal cranial  
182 length (DCL) and dorsal orbito-cranial length (ODCL), which is measured from the  
183 anterior margin of the orbit to the posterior margin of the skull. By using cranial  
184 measurements instead of estimated total body length, we are ultimately analysing  
185 patterns of cranial size evolution in crocodylomorphs. Nevertheless, by doing this we  
186 also avoid the addition of errors to our model-fitting analyses, since previous works  
187 have reported problems when estimating total body length from cranial measurements,  
188 particularly skull length (e.g., [46, 88, 96, 97]), as the equations were formulated using  
189 modern species and different crocodylomorph clades are likely to have body  
190 proportions distinct from those of living taxa (see Additional file 1). Furthermore, the  
191 range of body sizes among living and extinct crocodylomorphs is considerably greater  
192 than variation among size estimates for single species. Therefore, we expect to recover  
193 the most important macroevolutionary body size changes in our analyses even when  
194 using only cranial measurements. The use of ODCL, in addition to DCL, is justified as  
195 it allows us to examine the sensitivity of our results to changes in proportional snout  
196 length, as a major aspect of length change in crocodylomorph skulls results from  
197 proportional elongation or shortening of the snout [98, 99, 100]. Also, more taxa could  
198 be included in our analyses when doing so, because ODCL can be measured from some  
199 incomplete skulls.



200 The DCL dataset includes 219 specimens (representing 178 taxa), whereas the  
201 ODCL dataset includes 240 specimens (195 taxa). In total, measurements from 118  
202 specimens (83 taxa) were collected via first-hand examination from specimens, using  
203 callipers and measuring tape. The remaining information was collected from the  
204 literature (98 specimens) or photographs (21 specimens) supplied by other researchers,  
205 and measurements were estimated using the software ImageJ (see Additional file 2 for  
206 the complete list of sampled specimens). We used mean values in those cases where we  
207 had cranial measurements for multiple specimens of the same taxon. For both the  
208 model-fitting and correlation analyses, we used log-transformed skull measurements in  
209 millimetres. However, to help us further interpret and discuss our results, total body  
210 length was subsequently estimated using the equations presented by [91].

211

### 212 *Phylogenetic framework*

213 For the phylogenetic framework of Crocodylomorpha, the aim was to maximise taxon  
214 inclusion and to use a phylogenetic hypothesis that best represents the current  
215 consensus. We primarily used an informally modified version of the supertree presented  
216 by Bronzati et al. [35], which originally contained 245 taxa. We added recently  
217 published species, and removed taxa that have not yet received a formal description and  
218 designation. Also, species not previously included in phylogenetic studies but for which  
219 we had body size data were included based on the phylogenetic positions of closely  
220 related taxa (see Additional file 1 for more information on the supertree construction).  
221 Thus, our updated version of the supertree contains 296 crocodylomorph species, as  
222 well as nine closely related taxa used as outgroups for time-scaling the trees (see  
223 below).

224 To accommodate major uncertainties in crocodylomorph phylogeny, we also  
225 constructed two other supertrees, with alternative topologies, varying the position of  
226 Thalattosuchia. Thalattosuchians are Jurassic–Early Cretaceous aquatic  
227 crocodylomorphs, some of which were probably fully marine [101]. They have  
228 classically been placed within Neosuchia, as the sister taxon of Tethysuchia [99].  
229 Nevertheless, some authors have argued that this close relationship may result from the  
230 convergent acquisition of longirostrine snouts in both groups [98, 102], and some recent  
231 works have suggested alternative positions for Thalattosuchia, within or as the sister  
232 group of Crocodyliformes (i.e., only distantly related to Neosuchia [100, 103, 104,  
233 105]). Accordingly, to test the influence of uncertainty over the phylogenetic position of  
234 Thalattosuchia, we performed our macroevolutionary analyses using three distinct  
235 phylogenetic scenarios of Crocodylomorpha (Fig. 1). In the first, the more classic  
236 position of Thalattosuchia was maintained (Thalattosuchia as the sister taxon of  
237 Tethysuchia and within Neosuchia; as in the original supertrees of Bronzati et al. [34,  
238 35]). In the two alternative phylogenetic scenarios, Thalattosuchia was placed as the  
239 sister group of either Crocodyliformes (as non-crocodyliform crocodylomorphs),  
240 following the position proposed by Wilberg [100], or Mesoeucrocodylia (as the sister  
241 group of the clade formed by Neosuchia + Notosuchia in our topologies), following  
242 Larsson & Sues [106] and Montefeltro et al. [104]. Discrepancies among competing  
243 phylogenetic hypotheses do not concern only the “thalattosuchian problem” described  
244 above. However, our decision to further investigate only the impact of the different  
245 positions of Thalattosuchia is based on its high taxic diversity and the impact that its  
246 phylogenetic position has on branch lengths across multiple parts of the tree, factors that  
247 can substantially alter macroevolutionary patterns detected by our analyses.  
248

249 *Time-scaling method*

250 Calibration of the phylogeny to time [107] is a crucial step in comparative analyses of  
251 trait evolution, and the use of different methods may impact upon the inference of  
252 evolutionary models and the interpretation of results [108, 109]. As such, we decided to  
253 use a tip-dating approach using the fossilised birth-death (FBD) model [110]. The FBD  
254 method is a Bayesian total-evidence dating approach which uses a birth-death process  
255 that includes the probability of fossilization and sampling to model the occurrence of  
256 fossil species in the phylogeny and estimate divergence times (=node ages) [111, 112,  
257 113, 114]. Information on occurrence times of all species in the supertree (=tip ages)  
258 were initially obtained from the Paleobiology Database, but were then checked using  
259 primary sources in the literature. Fossil ages were represented by uncertainty bounds of  
260 their occurrences. We then generated an “empty” morphological matrix for performing  
261 Bayesian Markov chain Monte Carlo (MCMC) analyses in MrBayes version 3.2.6  
262 [115], following the protocol within the R package *paleotree* version 3.1.3 [116]. We  
263 used our supertree topologies (with alternative positions of Thalattosuchia) as  
264 topological constraints and set uniform priors on the age of tips based on the occurrence  
265 dates information. We used a uniform prior for the root of the tree (for all three  
266 topologies/phylogenetic scenarios), constrained between 245 and 260 Myr ago. This  
267 constraint was used because the fossil record indicates that a crocodylomorph origin  
268 older than the Early Triassic is unlikely [117, 118]. For each topology, 10,000,000  
269 generations were used, after which the parameters indicated that both MCMC runs  
270 seemed to converge (i.e., the Potential Scale Reduction Factor approached 1.0 and  
271 average standard deviation of split frequencies was below 0.01).

272 For each topology, we randomly sampled 20 trees (henceforth: FBD trees) from  
273 the posterior distribution after a burn-in of 25%. This resulted in 60 time-scaled,

274 completely resolved crocodylomorph trees that were used in our macroevolutionary  
275 model comparisons. Similar numbers of trees were used in previous work on dinosaurs  
276 [33], mammals [24] and early sauropsids [87]. Analyses across these 60 trees allowed  
277 us to characterise the influence of topological and time-scale uncertainty on our results.

278 Previous studies have demonstrated that time-calibration approaches can impact  
279 phylogenetic comparative methods (e.g., [119]). Therefore, we also used other three  
280 different time-scaling methods (*minimum branch length*, *cal3* and *Hedman* methods).  
281 Differently from the FBD tip-dating method, these three methods belong to the category  
282 of *a posteriori* time-scaling (APT) approaches (*sensu* Lloyd et al. [120]), and were used  
283 as a sensitivity analysis (see Additional file 1 for further details on the employment of  
284 these methods). These additional time-scaling approaches were used only for our initial  
285 model comparisons (see below). APT methods were performed in R version 3.5.1 [121],  
286 using package *paleotree* [116] (*mbl* and *cal3* methods) and the protocol published by  
287 Lloyd et al. [120] (*Hedman* method). Results from macroevolutionary analyses using  
288 these APT methods were similar to those using the FBD trees (see the “Results”  
289 section) and are therefore not discussed further in the main text (but are included in  
290 Additional file 1).

291

## 292 *Macroevolutionary models*

293 We applied a model-fitting approach to characterize patterns of body size evolution in  
294 Crocodylomorpha, with an emphasis on evolutionary models based on the Ornstein-  
295 Uhlenbeck (OU) process [33, 58, 61, 64, 83]. The first formulation of an OU-based  
296 model was proposed by Hansen (1997), based on Felsenstein’s [81] suggestion of using  
297 the Ornstein-Uhlenbeck (OU) process as a basis for comparative studies [61, 82]. OU-  
298 based models (also known as “Hansen” models) express the dynamics of a quantitative

299 trait evolving along the branches of a phylogeny as the result of stochastic variation  
300 around a trait “optimum” (expressed as theta:  $\theta$ ), towards which trait values are  
301 deterministically attracted (the strength of attraction is given by alpha:  $\alpha$ ). The constant  
302  $\sigma^2$ , describes the stochastic spread of the trait values over time (i.e., under a Brownian  
303 motion process). Accordingly, the OU model can be formulated as:

304

$$305 \quad dX(t) = \alpha [\theta - X(t)] dt + \sigma dB(t)$$

306

307         This equation expresses the amount of change in trait  $X$  during the infinitesimal  
308 time interval from  $t$  to  $t + dt$ . As expressed above, the formulation includes a term  
309 describing trait attraction towards  $\theta$ , which is the product of  $\alpha$  and the difference  
310 between  $X(t)$  and  $\theta$ . The term  $\sigma dB(t)$  describes stochastic evolution in the form of  
311 Brownian motion (BM), with random variables of mean zero and variance of  $dt$  (thus,  
312  $\sigma^2$  is the rate of stochastic evolution). In this sense, if  $\alpha$  is zero, the attraction term  
313 becomes zero, and the result is evolution by BM as a special case of OU [33, 61, 64].  
314 The OU model can also simulate trait evolution patterns similar to that observed under  
315 other evolutionary models, such as BM with a trend incorporated, and “white noise” or  
316 stasis [33, 58, 64]. Thus, examination of the fitted parameters of the OU model is  
317 crucial for interpreting the mode of evolution [58, 61]. For example, the estimated  
318 ancestral trait value (i.e., the value of  $\theta$  at the root of the tree) is given by the parameter  
319  $Z_0$ . Also, by obtaining  $\ln(2)/\alpha$ , we are calculating the time taken for a new  
320 macroevolutionary regime to become more influential than the ancestral regime (i.e.,  
321 how long it takes to  $\theta$  to be more influential than  $Z_0$ ). This parameter is often called the  
322 phylogenetic half-life (or  $t_{0.5}$ ) [58].

323           Among the methods that attempt to model adaptive evolution under the  
324 framework of an Ornstein-Uhlenbeck process (e.g., [78, 82, 122]), the SURFACE  
325 algorithm [83] estimates the fit of a non-uniform OU-based model by allowing shifts in  
326 trait optima ( $\theta$ ) among macroevolutionary regimes. SURFACE locates regime shifts  
327 using stepwise AICc (Akaike’s information criterion for finite sample sizes [84, 123,  
328 124]), with a forward phase (that searches for all regime shifts in the phylogeny) and a  
329 backward phase (in which improvements of AICc scores merge similar regimes,  
330 detecting “convergent” evolution). Although it allows  $\theta$  to vary among regimes,  
331 SURFACE assumes fixed whole-tree values of  $\sigma^2$  and  $\alpha$  [83].

332           We compared the performance of two different OU-based models, one with a  
333 single trait optimum or a single macroevolutionary regime (“OU model”) and another  
334 non-uniform model with multiple regimes (“SURFACE model”). To test if other  
335 macroevolutionary models could provide a better description of the observed patterns of  
336 crocodylomorph body size evolution, we also compared the OU-based models with  
337 other models. First, a uniform Brownian motion (BM model), which describes diffusive,  
338 unconstrained evolution via random walks along independent phylogenetic lineages,  
339 resulting in no directional trend in trait mean, but with increasing trait variance  
340 (=disparity) through time [57, 62, 63, 64]. Second, the “early burst” (EB model; also  
341 known as “ACDC model” [125]), in which the lineages experience an initial maximum  
342 in evolutionary rate of change, that decreases exponentially through time according to  
343 the parameter  $r$  [126]. This results in a rapid early increase in trait variance followed by  
344 deceleration [125, 126].

345           We also fitted a uniform (single-regime) and non-uniform (multi-regime) trend-  
346 like models. In the uniform “trend” model the parameter  $\mu$  is incorporated into the BM  
347 model to describe directional multi-lineage increase or decrease in trait values through

348 time in the entire clade [62, 63, 80]. Non-uniform “trend” models allow for shifts in the  
349 parameter  $\mu$ , which can be explored in two different ways according to the non-uniform  
350 trend models formulated by G. Hunt and presented in Benson et al. [33]: temporal shifts  
351 in  $\mu$  across all contemporaneous lineage (“time-shift trend models”), or shifts at specific  
352 nodes of the tree, modifying  $\mu$  in the descendent clade (“node-shift trend models”). In  
353 time-shift trend models, shifts to a new value of  $\mu$  occurs at time-horizons and are  
354 applied to all lineages alive at that time. In node-shift trend models, values of  $\mu$  can vary  
355 among contemporaneous lineages. In a similar approach to the forward phase of  
356 SURFACE, the shifts in these non-uniform trend-like models are detected via stepwise  
357 AICc. In both time-shift and node-shift models, the Brownian variance ( $\sigma^2$ ) is constant  
358 across all regimes [33]. For our macroevolutionary analyses with the entire  
359 crocodylomorph phylogeny, we fitted trend-like models that allowed up to three time-  
360 shifts and 10 node-shifts to occur, given that analyses with more shifts are  
361 computationally intensive and often receive significantly weaker support (following  
362 results presented by Benson et al. [33]).

363

#### 364 *Initial model comparison*

365 Our initial model comparison involved a set of exploratory analyses to test which  
366 evolutionary models (SURFACE, OU, BM, EB and trend-like models) offered the best  
367 explanation of our data, using log-transformed cranial measurements (for both DCL and  
368 ODCL). To reduce computational demands, we used only one position of  
369 Thalattosuchia (i.e., with the group positioned within Neosuchia). The aim here was to  
370 compare the performance of the OU-based models, particularly the SURFACE model,  
371 against the other BM-based evolutionary models, but also to evaluate possible  
372 influences of the different time-scaling methods (we used four different approaches as a

373 sensitivity analysis) and body size proxies. Maximum-likelihood was employed to fit  
374 these models to our body size data and the phylogeny of Crocodylomorpha, and we  
375 compared the AICc scores of each model.

376

### 377 *Appraisal of spurious model support*

378 Previous works suggested caution when fitting OU models in comparative analyses,  
379 since intrinsic difficulties during maximum-likelihood fits can lead to false positives  
380 and spurious support to overly complex models [e.g., 127, 128]. This issue may be  
381 reduced when using non-ultrametric trees (as done here), as it improves identifiability of  
382 the parameters of OU models [64, 127]. We also addressed this by using the  
383 phylogenetic Bayesian information criterion (pBIC: proposed by Khabbazian et al. [72])  
384 during the backward phase of model simplification in all our analyses (using the  
385 implementation for SURFACE from Benson et al. [33]). The pBIC criterion is more  
386 conservative than AICc, in principle favouring simpler models with fewer regimes with  
387 lower rates of false positive identification of regime shifts. Although these models were  
388 fit using pBIC, they were compared to other models (such as BM, EM and trend-like  
389 models) using AICc because pBIC is not implemented for most other models of trait  
390 evolution.

391       Furthermore, to evaluate the influence of spurious support for complex OU  
392 models, we simulated data under BM once on each of our 20 phylogenies, using the  
393 parameter estimates obtained from the BM model fits to those phylogenies. We then  
394 fitted both BM and SURFACE models to the data simulated under BM, and compared  
395 several aspects of the results to those obtained from analysis of our empirical body size  
396 data (using the ODCL dataset). Specifically, we compared delta-AICc (i.e., the  
397 difference between AICc scores received by BM and SURFACE models for each tree),



398 the number of regime shifts obtained by SURFACE, and the values of  $\alpha$  obtained by  
399 SURFACE. This allowed us to assess whether the results of SURFACE analyses of our  
400 empirical data could be explained by overfitting of a highly-parameterised non-uniform  
401 model to data that could equally be explained by an essentially uniform process.

402

#### 403 *Further SURFACE analyses*

404 Our initial model comparisons provided strong support for the SURFACE model (see  
405 the “Results” section). Subsequent analyses therefore focussed on SURFACE, which is  
406 particularly useful because it identifies macroevolutionary regimes that provide a  
407 simplified map of the major patterns of body size evolution in crocodylomorphs. This  
408 second phase of analyses made use of all three alternative phylogenetic scenarios  
409 (varying the position of Thalattosuchia) to test the influence of phylogeny in  
410 interpretations of evolutionary regimes for body size in Crocodylomorpha. We fitted  
411 SURFACE to 20 FBD trees, of each alternative topology, using body size data from the  
412 ODCL dataset (our initial model comparisons indicated that both our size indices  
413 yielded essentially identical results, and ODCL is available for more taxa). As before,  
414 we performed our SURFACE analyses using pBIC [72] during the backward-phase of  
415 the algorithm.

416

#### 417 *Clade-specific analyses with Notosuchia and Crocodylia*

418 Two well-recognized crocodylomorph subclades, Notosuchia and Crocodylia, returned  
419 a relatively high frequency of macroevolutionary regime shifts, representing an  
420 apparently complex evolutionary history under the SURFACE paradigm. However, the  
421 SURFACE algorithm fits a single value of  $\alpha$  to all regimes, and therefore could  
422 overestimate the strength of evolutionary constraint within regimes, and consequently

423 miscalculate the number of distinct regimes within clades showing more relaxed  
424 patterns of trait evolution. We investigated this possibility by fitting the initial set of  
425 evolutionary models (SURFACE, OU, BM, EB and trend-like models) to the  
426 phylogenies of these two subclades (using 50 FBD trees for each clade, sampled from  
427 the posterior distribution of trees time-scaled with the FBD method) and their body size  
428 data (using only the ODCL dataset, since it includes more species). Differently from  
429 what was done for the entire crocodylomorph phylogeny, for *Notosuchia* we fitted  
430 trend-like models with up to 2 time-shifts and 5 node-shifts, whereas for *Crocodylia* we  
431 allowed up to 3 time-shifts and 7 node-shifts to occur, given that these two clades  
432 include fewer species (70 crocodylians and 34 notosuchians were sampled in our ODCL  
433 dataset) and fewer shifts are expected.

434         In addition, for these same clades, we also employed the OUwie model-fitting  
435 algorithm [82], fitting different BM and OU-based models which allow all key  
436 parameters to vary freely (since SURFACE allows only  $\theta$  to vary, whereas it assumes  
437 fixed values of  $\sigma^2$  and  $\alpha$  for the entire tree). However, differently from SURFACE,  
438 OUwie needs *a priori* information on the location of regime shifts in order to be  
439 implemented. Thus, we incorporated the regime shifts identified by SURFACE into our  
440 phylogenetic and body size data (by extracting, for each tree, the regime shifts from  
441 previous SURFACE results) to fit four additional evolutionary models using the OUwie  
442 algorithm: BMS, which is a multi-regime BM model that allows the rate parameter  $\sigma^2$  to  
443 vary; OUMV, a multi-regime OU-based model that allows  $\sigma^2$  and the trait optimum  $\theta$  to  
444 vary; OUMA, also a multi-regime OU model, in which  $\theta$  and the constraint parameter  $\alpha$   
445 can vary; and OUMVA, in which all three parameters ( $\theta$ ,  $\alpha$  and  $\sigma^2$ ) can vary. Since  
446 computing all these parameter estimates can be an intensively demanding task [82],  
447 some of the model fits returned nonsensical values and were, therefore, discarded.

448 Nonsensical values were identified by searching for extremely disparate parameter  
449 estimates, among all 50 model fits (e.g., some model fits found  $\sigma^2$  values higher than  
450 100,000,000 and  $\alpha$  lower than 0.00000001).

451 All macroevolutionary analyses were performed in R version 3.5.1 [121].  
452 Macroevolutionary models BM, trend, EB, and OU with a single regime were fitted  
453 using the R package *geiger* [122]. The SURFACE model fits were performed with  
454 package *surface* [83]. Implementation of pBIC functions in the backward-phase of  
455 SURFACE model fits, as well as the functions for fitting non-uniform trend-like  
456 models, were possible with scripts presented by Benson et al. [33]. Simulated data  
457 under BM (for assessing the possibility of spurious support to the SURFACE model)  
458 was obtained with package *mvMORPH* [129]. The additional clade-specific model-  
459 fitting analyses, using the OUwie algorithm, were implemented with the package  
460 *OUwie* [130].

461

#### 462 *Correlation with abiotic and biotic factors*

463 To test whether abiotic environmental factors could be driving the evolution and  
464 distribution of body sizes in crocodylomorphs, we extracted environmental information  
465 from the literature. As a proxy for palaeotemperature, we used  $\delta^{18}\text{O}$  data from two  
466 different sources. The dataset from Zachos et al. [131] assembles benthic foraminifera  
467 isotopic values from the Late Cretaceous (Maastrichtian) to the Recent. The work of  
468 Prokoph et al. [132] compiled sea surface isotopic values from a range of marine  
469 organisms. Their dataset is divided into subsets representing palaeolatitudinal bands.  
470 For our analyses, we used the temperate palaeolatitudinal subset, which extends from  
471 the Jurassic to the Recent, but also the tropical palaeolatitudinal subset, which extends  
472 back to the Cambrian. For the correlation analyses, we used 10 Myr time bins (see

473 Additional file 1 for information on time bins), by taking the time-weighted mean  $\delta^{18}\text{O}$   
474 for data points that fall within each time bin. For the body size data used in the  
475 correlation tests, we calculated maximum and mean size values for each time bin, using  
476 both DCL and ODCL datasets. Correlations between our body size data and the proxies  
477 for palaeotemperature were first assessed using ordinary least squares (OLS)  
478 regressions. Then, to avoid potential inflation of correlation coefficients created by  
479 temporal autocorrelation (the correlation of a variable with itself through successive  
480 data points), we used generalised least squares (GLS) regressions with a first-order  
481 autoregressive model incorporated (see e.g., [36, 133, 134, 135]). Furthermore, to test  
482 the possible differential influence of temperature on marine versus continental  
483 (terrestrial and freshwater) animals, we also created two additional subsets of our data,  
484 one with only marine and another with only non-marine crocodylomorphs (ecological  
485 information for each taxon was obtained from the PBDB and the literature, e.g., [36,  
486 136]).

487 We also collected palaeolatitudinal data for every specimen in our dataset from  
488 the Paleobiology Database (PBDB) and the literature, and tested the correlation between  
489 these and our body size data (DCL and ODCL datasets). To test whether our body size  
490 data is correlated with palaeolatitudinal data, we first applied OLS regressions to  
491 untransformed data. Then, to deal with possible biases generated by phylogenetic  
492 dependency, we used phylogenetic generalized least squares regressions (PGLS [137]),  
493 incorporating the phylogenetic information from the maximum clade credibility (MMC)  
494 tree, with *Thalattosuchia* placed within *Neosuchia*, obtained from our MCMC tip-dating  
495 results. For this, branch length transformations were optimised between bounds using  
496 maximum-likelihood using Pagel's  $\lambda$  [138] (i.e., argument  $\lambda = \text{"ML"}$  within in the  
497 function `pgls()` of the R package *caper* [139]). As for the correlation analyses between

498 our body size data and palaeotemperature, we also analysed marine and only non-  
499 marine taxa separately. To explore the effects of these two abiotic factors on the  
500 distribution of body sizes at more restricted levels (temporal and phylogenetic), we  
501 repeated our regression analyses using subsets of both ODCL and DCL datasets,  
502 including body size data only for species of Crocodylia, Notosuchia, Thalattosuchia,  
503 and Tethysuchia. For crocodylians, correlations with paleotemperature were restricted  
504 to the Maastrichtian until the Recent (i.e., data from [131]).

505 We also explored the possible impact of clade-specific evolutionary transitions  
506 between the environments on crocodylomorph body size evolution. For that, we  
507 obtained ecological information for each taxon from the PBDB and the literature (e.g.,  
508 [36, 136]), subdividing our body size data (from the ODCL dataset, since it included  
509 more taxa) into three discrete categories to represent different generalised ecological  
510 lifestyles: terrestrial, semi-aquatic/freshwater, and aquatic/marine. We then used  
511 analysis of variance (ANOVA) for pairwise comparisons between different lifestyles.  
512 We also accounted for phylogenetic dependency by applying a phylogenetic ANOVA  
513 [140], incorporating information from the MCC tree with Thalattosuchia placed within  
514 Neosuchia. For both ANOVA and phylogenetic ANOVA, Bonferroni-corrected p-  
515 values (q-values) for *post-hoc* pairwise comparisons were calculated. Phylogenetic  
516 ANOVA was performed with 100,000 simulations.

517 All correlation analyses (with abiotic and biotic factors) used log-transformed  
518 cranial measurements (DCL or ODCL) in millimetres and were performed in R version  
519 3.5.1 [121]. GLS regressions with an autoregressive model were carried out using the  
520 package *nlme* [141], PGLS regressions used the package *caper* [139], whereas  
521 phylogenetic ANOVA was performed using the package *phytools* [142].

522

523 *Disparity estimation*

524 Important aspects of crocodylomorph body size evolution can be revealed by  
525 calculating body size disparity through time. There are different methods and metrics  
526 for quantifying morphological disparity (e.g., [143, 144, 145, 146]), and in the present  
527 study disparity is represented by the standard deviation of log-transformed body size  
528 values included in each time bin. We also plotted minimum and maximum sizes for  
529 comparison. Our time series of disparity used the same time bins as for the correlation  
530 analyses, with the difference that only time bins with more than three taxa were used for  
531 calculating disparity (time bins containing three or fewer taxa were lumped to adjacent  
532 time bins; see Additional file 1 for information on time bins). Disparity through time  
533 was estimated based on the ODCL dataset (since it includes more taxa).

534

535 **Results**

536 *Initial model comparison*

537 Comparisons between the AICc scores for all the evolutionary models fitted to our  
538 crocodylomorph body size data (Fig. 2a and b; see Additional file 1: Figures S5 for  
539 results of the sensitivity analysis using different time-scaling methods) show extremely  
540 strong support (i.e. lower AICc values) for the SURFACE model. This is observed for  
541 both body size proxies (DCL and ODCL) and independently of the time-scaling method  
542 used. All uniform models exhibit relatively similar AICc scores, including the OU  
543 model with a single macroevolutionary regime, and all of these are poorly supported  
544 compared to the SURFACE model. For trees calibrated with the FBD methods, all  
545 trend-like models (i.e., either uniform or multi-trend models) received very similar  
546 support, using both size proxies, and have AICc values that are more comparable to the  
547 set of uniform models than to the SURFACE model. Even the best trend-like model

548 (usually the models with two or three node-shifts, which are shown as the “best trend”  
549 model in Fig. 2a and b) have significantly weaker support than SURFACE, regardless  
550 of the time-calibration method used (see Additional file 3 for a complete list of AICc  
551 scores, including for all trend-like models).

552

### 553 *Appraising spurious support to the SURFACE model*

554 SURFACE models were generally favoured by AICc compared to a single-regime BM  
555 model for our simulated trait data, even though these data were simulated under BM.  
556 This is consistent with previous observations of spurious support and high false positive  
557 rates for SURFACE models based on stepwise AICc methods [127, 128]. Nevertheless,  
558 our results indicate substantially stronger support for SURFACE models based on our  
559 empirical data compared to that for the data simulated under BM (Fig. 2a and b).  
560 Median delta-AICc between SURFACE and BM models for the simulated data were  
561 60.38, compared to 157.93 for the empirical data, and the distributions of these delta-  
562 AICc values are significantly different according to a Wilcoxon–Mann–Whitney test ( $p$   
563  $< 0.001$ ). Furthermore, the number of regime shifts detected and the values of  $\alpha$   
564 estimated are significantly higher ( $p < 0.001$ ) when using the empirical data (Fig. 2c-e;  
565 median values of  $\alpha$  estimated of 0.009 and 0.09, for simulated and empirical data,  
566 respectively; median number of regimes detected: 17.5 compared to 24.5).

567         These results suggest that the support for SURFACE models as explanations of  
568 our empirical data goes beyond that anticipated simply due to false positives expected  
569 for these complex, multi-regime models [127]. Furthermore, the SURFACE model fits  
570 represent a useful simplification of major patterns of body size evolution in a group, and  
571 particularly the shifts of average body sizes among clades on the phylogeny. Thus,  
572 although we acknowledge that some model fits might be suboptimal or could be

573 returning some unrealistic parameter estimates, we use our SURFACE results to  
574 provide an overview of crocodylomorph body size evolution that is otherwise lacking  
575 from current literature.

576

#### 577 *Describing the body size macroevolutionary patterns in Crocodylomorpha*

578 The use of alternative positions of Thalattosuchia (see the “Methods” section) allowed  
579 us to further examine the impact of more significant changes to tree topologies on our  
580 SURFACE results. In general, similar model configurations were found for all tree  
581 topologies (Figs. 3, 4, and 5; see Additional file 4 for all SURFACE plots), with  
582 numerous regime shifts detected along crocodylomorph phylogeny. However, simpler  
583 model fits (i.e., with significantly less regime shifts) are relatively more frequent when  
584 Thalattosuchia is placed as the sister group of Crocodyliformes. To further investigate  
585 this, we recalibrated the same tree topologies with other time-scaling methods (i.e., *mb1*  
586 and *cal3* methods), and applied SURFACE to those recalibrated trees. Some of these  
587 trees returned more complex models, with a greater number of regime shifts and better  
588 pBIC scores. This indicates that some of the simpler model configurations might be  
589 suboptimal, given that AIC procedures might face difficulties [147], which have  
590 previously demonstrated for other datasets (e.g., in dinosaurs [33]).

591 Overall, most SURFACE model fits identified more than five main  
592 macroevolutionary regimes (i.e., “convergent” regimes, identified during the backward-  
593 phase of SURFACE), independently of the position of Thalattosuchia (Figs. 3, 4, and  
594 5). Those are distributed along crocodylomorph phylogeny by means of numerous  
595 regime shifts, usually more than 20. Trait optima values for these regimes varied  
596 significantly among different crocodylomorph subclades and are described in detail  
597 below. Overall, regime shifts are frequently detected at the bases of well-recognised



598 clades, such as Thalattosuchia, Notosuchia and Crocodylia. Nevertheless, shifts to new  
599 regimes are not restricted to the origins of these diverse clades, since many other regime  
600 shifts are observed across crocodylomorph phylogeny, including regimes containing  
601 only a single species.

602 Our SURFACE results indicate an ancestral regime of small body sizes for  
603 Crocodylomorpha, regardless of the position of Thalattosuchia (Figs. 3, 4, and 5). This  
604 is consistent with the small body sizes of most non-crocodyliform crocodylomorphs  
605 such as *Litargosuchus leptorhynchus* and *Hesperosuchus agilis* [50, 51]. The vast  
606 majority of the model fits show trait optima for this initial regime ( $Z_0$ ) ranging from 60  
607 to 80 cm (total body length was estimated only after the SURFACE model fits, based on  
608 the equation from [91]; see the “Methods” section). Very few or no regime shifts are  
609 observed among non-crocodyliform crocodylomorphs (Figs. 3, 4, and 5b). The possible  
610 exception to this is in Thalattosuchia, members of which occupy large body sized  
611 regimes ( $\theta = 500\text{--}1000$  cm), and which is placed outside Crocodyliformes in some of  
612 our phylogenies (Fig. 5a). Regardless of the position of Thalattosuchia, the ancestral  
613 regime of all crocodylomorphs ( $Z_0$ ) was inherited by protosuchids (such as  
614 *Protosuchus*, *Orthosuchus*, and *Edentosuchus*) and some other non-mesoeucrocodylian  
615 crocodyliforms (e.g., *Shantungosuchus*, *Fruitachampsia*, *Sichuanosuchus* and  
616 *Gobiosuchus*).

617 Mesoeucrocodylia and *Hsisosuchus* share a new evolutionary regime of slightly  
618 larger body sizes ( $\theta = 130\text{--}230$  cm) in most model fits. This is usually located at the end  
619 of the Late Triassic (Rhaetian), and the recovery of this shift is independent of the  
620 phylogenetic position of Thalattosuchia (Figs. 3, 4, and 5). The regime that originates at  
621 the base of Mesoeucrocodylia ( $\theta = 130\text{--}230$  cm) is often inherited by Notosuchia and  
622 Neosuchia, even though many regime shifts are observed later on during the evolution

623 of these two clades. Within Notosuchia, although some taxa inherit the same regime of  
624 smaller sizes present at the base of the clade ( $\theta = 130\text{--}230$  cm), many regime shifts are  
625 also observed (often more than four). Regime shifts to smaller sizes ( $\theta = 60\text{--}100$  cm)  
626 are often seen in uruguaysuchids (including all *Araripesuchus* species), *Anatosuchus*,  
627 *Pakasuchus* and *Malawisuchus*. Shifts towards larger sizes are seen among peirosaurids  
628 ( $\theta = 210\text{--}230$  cm) and, more conspicuously, in sebecosuchids and sometimes in the  
629 armoured sphagesaurid *Armadillosuchus arrudai* ( $\theta = 330\text{--}350$  cm).

630 Independent regime shifts to much smaller sizes ( $\theta = 40\text{--}60$  cm) are present  
631 among non-eusuchian neosuchians (excluding Thalattosuchia and Tethysuchia),  
632 particularly in atoposaurids, *Susisuchus*, and *Pietraroiiasuchus*, whereas shifts to larger  
633 sizes ( $\theta = 300\text{--}850$  cm) are also detected, often in *Paralligator major* and in some  
634 goniopholidids. Within both Tethysuchia and Thalattosuchia, most taxa occupy a  
635 regime of relatively large body sizes ( $\theta = 500\text{--}1000$  cm). When these two clades are  
636 sister taxa (Figs. 3 and 4) they usually inherit a same body size regime ( $\theta = 500\text{--}550$   
637 cm), which originated during the Early Jurassic (Hettangian). In contrast, when  
638 Thalattosuchia is placed as sister to Crocodyliformes or Mesoeucrocodylia (Fig. 5), the  
639 regime shifts to larger sizes are often independent, and occur at the base of each clade  
640 (also with  $\theta$  values around 500 cm) or later on during their evolutionary history (e.g.,  
641 some model fits show Tethysuchia with regime shifts to larger sizes only at the base of  
642 Dyrosauridae [ $\theta \approx 500$  cm] and the clade formed by *Chalawan* and *Sarcosuchus* [ $\theta =$   
643  $800\text{--}1000$  cm]). Both groups also exhibit regime shifts to smaller sizes ( $\theta = 100\text{--}150$   
644 cm) in some lineages, such as those leading to *Pelagosaurus typus* and *Teleosaurus*  
645 *cadomensis* within Thalattosuchia, and *Vectisuchus* within Tethysuchia. Among  
646 thalattosuchians, a conspicuous shift towards larger body sizes ( $\theta = 800\text{--}1000$  cm) is  
647 frequently observed in the teleosaurid clade formed by *Machimosaurus* and

648 *Steneosaurus*, whereas within Metriorhynchidae, a shift to smaller sizes ( $\theta = 230\text{--}350$   
649 cm) is often detected in Rhacheosaurini.

650 Crocodylia is also characterized by a predominance of macroevolutionary  
651 regimes of relatively large sizes, such as in Thalattosuchia and Tethysuchia. Indeed,  
652 regimes of large sizes are frequently associated with clades of predominantly aquatic or  
653 semi-aquatic forms, although not strictly restricted to them. Regarding Crocodylia, a  
654 Cretaceous regime shift is usually detected at the base of the clade (Figs. 3, 4, and 5),  
655 changing from the macroevolutionary regime of smaller sizes ( $\theta = 130\text{--}180$  cm) found  
656 for non-crocodylian eusuchians (such as hylaeochampsids and some allodaposuchids) to  
657 a regime of larger trait optimum ( $\theta = 280\text{--}340$  cm). This same ancestral regime to all  
658 crocodylians is inherited by many members of the clade, particularly within  
659 Crocodyloidea and Gavialoidea. Although some model fits show Crocodylia inheriting  
660 the same regime as closely related non-crocodylian eusuchians (more frequently when  
661 Thalattosuchia is placed outside Neosuchia), shifts towards larger body sizes are seen in  
662 members of Crocodyloidea and Gavialoidea, but they only occur later in time and arise  
663 independently. In comparison to the other two main lineages of Crocodylia,  
664 Alligatoroidea is characterized by a regime of lower trait optima values ( $\theta = 210\text{--}230$   
665 cm), which frequently occurs as a Late Cretaceous shift at the base of the clade. But  
666 Alligatoroidea is also distinct from the other two clades by exhibiting more regime  
667 shifts, reflecting its great ecological diversity and body size disparity (ranging from very  
668 small taxa, such as the caimanine *Tsoabichi greenriverensis*, to the huge *Purussaurus*  
669 and *Mourasuchus*).

670

671

672

673 *Modes of body size evolution within Notosuchia and Crocodylia*

674 The significant number of regime shifts that occur within both Notosuchia and  
675 Crocodylia led us to more deeply scrutinise the modes of body size evolution in these  
676 two clades. We therefore conducted another round of model-fitting analyses, initially  
677 fitting the same evolutionary models (SURFACE, OU, BM, EB and trend-like models)  
678 to subtrees representing both groups. In addition, we used the same regime shifts  
679 identified by the SURFACE algorithm to fit four additional models using the OUwie  
680 algorithm (BMS, OUMV, OUMA and OUMVA), which allow more parameters to vary,  
681 but need regime shifts to be set *a priori*.

682 The results of these analyses indicate different modes of body size evolution  
683 during the evolutionary histories of these two groups. In Crocodylia (Fig. 6; see  
684 Additional file 3 for a complete list of AICc scores), AICc scores indicate a clear  
685 preference for OU-based models, with highest support found for the SURFACE model,  
686 but also strong support for the uniform OU model, as well as OUMA and OUMVA  
687 models. The SURFACE algorithm frequently identified at least three main (i.e.  
688 “convergent”) macroevolutionary regimes for crocodylians (with  $\theta$  values around 200,  
689 350 and 750 cm, respectively), usually with  $\alpha$  ranging from 0.02 to 0.2 and  $\sigma^2$  between  
690 0.0007 and 0.02. When allowed to vary among regimes (i.e., in models OUMA and  
691 OUMVA), ranges of both parameters increase significantly, with some model fits  
692 displaying extremely unrealistic parameter values, which might explain the stronger  
693 support found for SURFACE compared to these latter models. Even though the  
694 relatively small number of taxa included in these analyses (i.e.  $N = 70$ ) suggests caution  
695 when interpreting the higher support for OU-based models [128], BM-based models  
696 received consistently worse support than any of the four OU-based models mentioned

697 above, even the best trend-like model (usually the one with the best AICc scores among  
698 BM-based models).

699 Our results show a different scenario for Notosuchia, for which we found  
700 comparable support for all evolutionary models analysed (Fig. 6). Among OU-based  
701 models, slightly better AICc scores were found for the SURFACE model. However, this  
702 model received virtually the same support as the BMS model, the best of the BM-based  
703 models. BMS is a multi-regime BM model that allows the rate parameter ( $\sigma^2$ ) to vary,  
704 and, as  $\alpha$  is effectively set to zero, represents diffusive model of evolution. The support  
705 found for this model might suggest a more relaxed mode of body size evolution in  
706 notosuchians, which is consistent with the wide range of body sizes observed in the  
707 group, even among closely-related taxa. Although OU-based models (including  
708 SURFACE) are not favoured over other evolutionary models, we can use some  
709 SURFACE model to further explore body size evolutionary patterns among Notosuchia.  
710 For example, even though we sampled twice as many crocodylians ( $N = 70$ ) as  
711 notosuchians ( $N = 34$ ), many SURFACE model fits found three main  
712 macroevolutionary regimes for notosuchians, similar to what was found for Crocodylia  
713 (although model fits with less regimes were more frequent for Notosuchia than  
714 Crocodylia). For these,  $\theta$  values were usually around 80, 150 and 320 cm, with  $\alpha$   
715 usually ranging from 0.008 to 0.05 and  $\sigma^2$  between 0.0007 and 0.005. When the same  
716 regimes detected by the SURFACE algorithm were used by the OUwie algorithm to fit  
717 the BMS model, values of  $\sigma^2$  rarely varied significantly from the range of whole-tree  $\sigma^2$   
718 estimated for the SURFACE model fits. The few exceptions were usually related to  
719 regimes with unrealised  $\theta$  values, as in the case of the armoured sphagesaurid  
720 *Armadillosuchus arrudai* (probably with more than 2 metres in total length, whereas  
721 other sampled sphagesaurids reach no more than 1.2 m [148]), and sebecosuchians (top

722 predators of usually more than 2.5 metres [97]), even though these values might still be  
723 realistic when simulating trend-like dynamics (i.e., in a single lineage with extremely  
724 disparate trait values [19, 57]).

725

#### 726 *The influence of palaeolatitude and palaeotemperature*

727 Most of the correlation analyses between our body size data and the different datasets of  
728 the abiotic factors palaeotemperature and palaeolatitude yielded weak (coefficient of  
729 determination  $R^2$  usually smaller than 0.2) or non-significant correlations (see  
730 Additional file 1 for all regressions and further results). This is consistent with the  
731 distribution of crocodylomorph body size through time (Fig. 7), as well as with the  
732 results from our macroevolutionary analyses, which found strong support for a multi-  
733 regime OU model (SURFACE). This suggests that shifts between macroevolutionary  
734 regimes (which we interpret as “maximum adaptive zones” sensu Stanley [11]) are more  
735 important in determining large-scale macroevolutionary patterns of crocodylomorph  
736 body size evolution than these abiotic factors, at least when analysed separately.

737         However, one important exception was found: a correlation between mean body  
738 size values and palaeotemperatures from the Late Cretaceous (Maastrichtian) to the  
739 Recent (data from [131]). Using either all taxa in the datasets or only non-marine  
740 species, we found moderate to strong correlations ( $R^2$  ranging from 0.376 to 0.635),  
741 with higher mean body size values found in time intervals with lower temperatures (i.e.,  
742 positive slopes, given that the  $\delta^{18}\text{O}$  proxy is inversely proportional to temperature). The  
743 correlation was present even when we applied GLS regressions with an autoregressive  
744 model (Table 1), which returned near-zero or low autocorrelation coefficients ( $\phi =$   
745 0.01–0.15). This suggests that temperature might have had an influence in determining  
746 the body size distribution of crocodylomorphs at smaller temporal and phylogenetic

747 scales. For this reason, we decided to further scrutinise the relationships between the  
748 distribution of body sizes and these abiotic factors at these smaller scales, repeating our  
749 regression analyses using only data for Crocodylia, Notosuchia, Thalattosuchia, and  
750 Tethysuchia (see the “Methods” section).

751         These additional regressions corroborate the hypothesis that at least some  
752 crocodylomorph subclades show a correspondence between body size and global  
753 palaeotemperature. Although most of the regressions provided non-significant or  
754 weak/very weak correlations (see Additional file 1 for all regression results), including  
755 all regressions of body size on palaeolatitudinal data, both maximum and mean body  
756 size values of Crocodylia are moderately to strongly correlated to palaeotemperature  
757 through time (Table 2). The positive slopes and coefficients of determination ( $R^2$   
758 ranging from 0.554 to 0.698) indicate that the lowest temperatures are associated with  
759 the highest body size values in the crown-group. However, correlations with data from  
760 other subclades (Notosuchia, Thalattosuchia and Tethysuchia) were mostly non-  
761 significant, suggesting that this relationship between body size and temperature was not  
762 a widespread pattern among all groups.

763

764

765

766

767

768

769

770

771

772 **Table 1.** Regression results of mean values of body size values on palaeotemperature.

| <b>Dataset</b>                | <b>GLS</b> |                  |                  |            | <b>OLS (untransformed)</b> |                  |                  |            |
|-------------------------------|------------|------------------|------------------|------------|----------------------------|------------------|------------------|------------|
|                               | <b>Phi</b> | <b>Intercept</b> | <b>Slope</b>     | <b>AIC</b> | <b>R<sup>2</sup></b>       | <b>Intercept</b> | <b>Slope</b>     | <b>AIC</b> |
| <b>ODCL<br/>with all taxa</b> | -0.046     | 2.022            | 0.055<br>(0.002) | -31.576    | 0.635                      | 2.023            | 0.054<br>(0.003) | -33.557    |
| <b>DCL<br/>with all taxa</b>  | 0.014      | 2.433            | 0.081<br>(0.011) | -19.577    | 0.527                      | 2.433            | 0.081<br>(0.01)  | -21.575    |
| <b>ODCL<br/>non-marine</b>    | -0.157     | 1.964            | 0.06<br>(0.007)  | -24.96     | 0.502                      | 1.965            | 0.06<br>(0.013)  | -26.706    |
| <b>DCL<br/>non-marine</b>     | -0.089     | 2.345            | 0.07<br>(0.027)  | -16.045    | 0.376                      | 2.346            | 0.07<br>(0.034)  | -18.272    |

773 Results of GLS (with an autoregressive model) and OLS (untransformed data) regressions.  
 774 Mean body size represented by mean values of log-transformed cranial measurements (DCL and  
 775 ODCL), in millimetres. Data from both ODCL and DCL datasets was divided into subsets with  
 776 all crocodylomorphs or only non-marine species. N = 10 in all four subsets (number of time bins  
 777 analysed). Palaeotemperature data from [131], represented by  $\delta^{18}\text{O}$  data from the Late  
 778 Cretaceous to Recent. Only significant correlations ( $p < 0.05$ ) are shown.

779

780

781 **Table 2.** Regression results of maximum and mean crocodylian body size values on  
 782 palaeotemperature.

| <b>Dataset</b>               | <b>GLS</b> |                  |                   |            | <b>OLS (untransformed)</b> |                  |                  |            |
|------------------------------|------------|------------------|-------------------|------------|----------------------------|------------------|------------------|------------|
|                              | <b>Phi</b> | <b>Intercept</b> | <b>Slope</b>      | <b>AIC</b> | <b>R<sup>2</sup></b>       | <b>Intercept</b> | <b>Slope</b>     | <b>AIC</b> |
| <b>ODCL<br/>maximum size</b> | 0.19       | 2.133            | 0.121<br>(0.017)  | -11.989    | 0.554                      | 2.124            | 0.127<br>(0.008) | -13.662    |
| <b>ODCL<br/>mean size</b>    | -0.297     | 1.98             | 0.075<br>(0.0003) | -29.953    | 0.698                      | 1.987            | 0.07<br>(0.001)  | -31.137    |
| <b>DCL<br/>maximum size</b>  | -0.215     | 2.618            | 0.165<br>(0.001)  | -10.724    | 0.632                      | 2.627            | 0.157<br>(0.003) | -12.355    |
| <b>DCL<br/>mean size</b>     | -0.235     | 2.386            | 0.105<br>(0.0007) | -20.748    | 0.647                      | 2.395            | 0.098<br>(0.003) | -22.325    |

783 Results of GLS (with an autoregressive model) and OLS (untransformed data) regressions.  
 784 Mean and maximum body size only for members of the crown-group Crocodylia, represented  
 785 by mean and maximum values of log-transformed cranial measurements (DCL and ODCL), in  
 786 millimetres. N = 10 in all four datasets (number of time bins analysed). Palaeotemperature data  
 787 from [131], represented by  $\delta^{18}\text{O}$  data from the Late Cretaceous to Recent. Only significant  
 788 correlations ( $p < 0.05$ ) are shown.



789

790 *Correlation between body size and habitat choice*

791 We initially found a relationship between lifestyle (i.e., terrestrial, semi-  
792 aquatic/freshwater, and aquatic/marine) and body size using ANOVA. However, a  
793 phylogenetic ANOVA [140] returned non-significant results (Table 3). Phylogenetic  
794 ANOVA asks specifically whether evolutionary habitat transitions are consistently  
795 associated with particular body size shifts as optimised on the phylogeny. This indicates  
796 that, although crocodylomorphs with more aquatic lifestyles (particularly marine  
797 species) tend to be large-bodied, the evolutionary transitions between these lifestyle  
798 categories were probably not accompanied by immediate non-random size changes.  
799 Furthermore, the smaller body sizes of some aquatic or semi-aquatic lineages (e.g.,  
800 atoposaurids, *Tsoabichi* and *Pelagosaurus*) show that adaptive peaks of smaller sizes  
801 are also viable among aquatic/semi-aquatic species. This suggests that, even though  
802 there seems to be an ecological advantage for larger-sized freshwater/marine  
803 crocodylomorphs, the lower limit of body size in aquatic species was comparable to that  
804 of terrestrial species.

805

806

807

808

809

810

811

812

813

814 **Table 3.** Pairwise comparison between body size of crocodylomorphs subdivided into three  
815 lifestyle categories.

| Category                       | Mean  | Std. Deviation | Std. Error | Pairwise comparisons            | t-value | ANOVA q-value | Phylo ANOVA q-value |
|--------------------------------|-------|----------------|------------|---------------------------------|---------|---------------|---------------------|
| <b>Terrestrial</b>             | 1.854 | 0.223          | 0.0333     | <b>Terrestrial – Freshwater</b> | 4.196   | < 0.001*      | 1                   |
| <b>Semi-aquatic/freshwater</b> | 2.026 | 0.249          | 0.0249     | <b>Terrestrial – Marine</b>     | 8.721   | < 0.001*      | 0.085               |
| <b>Aquatic/marine</b>          | 2.263 | 0.185          | 0.0261     | <b>Freshwater – Marine</b>      | 5.997   | < 0.001*      | 0.412               |

816 Body size data from the ODCL dataset (log-transformed cranial measurement, in millimetres).

817 Number of species in each category: 45 (terrestrial), 100 (semi-aquatic/freshwater), and 50

818 (aquatic/marine). Results from ANOVA, without accounting for phylogenetic dependency, and

819 phylogenetic ANOVA [140] with 100,000 simulations. \*Bonferroni-corrected p-values (q-

820 values) significant at alpha = 0.05

821

822

## 823 **Discussion**

### 824 *The adaptive landscape of crocodylomorph body size evolution*

825 Crocodylomorph body size disparity increased rapidly during the early evolution of the

826 group, from the Late Triassic to the Early Jurassic (Hettangian–Sinemurian), which is

827 mostly a result of the appearance of the large-bodied thalattosuchians (Fig. 8b). After a

828 decline in the Middle Jurassic, body size disparity reaches its maximum peak in the Late

829 Jurassic, with the appearance of atoposaurids, some of the smallest crocodylomorphs, as

830 well as large teleosaurids (such as *Machimosaurus*). This increase in disparity may have

831 occurred earlier than our results suggest, given that Middle Jurassic records of

832 atoposaurids [149] could not be included in our analyses due to their highly incomplete

833 preservation.

834 Since this peak in the Middle/Late Jurassic, crocodylomorphs underwent an

835 essentially continuous decline in body size disparity, with some short-term fluctuations

836 related to the extinction or diversification of particular lineages. The Early Cretaceous

837 witnessed the extinction of thalattosuchians, and a sharp decrease in disparity is seen  
838 from the Berriasian to the Barremian (although this time interval is also relatively  
839 poorly sampled in our dataset). A subsequent increase in disparity is seen in the Aptian,  
840 probably reflecting the appearance of small-bodied crocodylomorphs (such as  
841 susisuchid eusuchians). Nevertheless, this is followed by a continuing decline for the  
842 remainder of the Cretaceous (in spite of the occurrence of highly disparate  
843 notosuchians). The Cenozoic is also characterised by an overall decrease in disparity,  
844 even though some short-term increases in disparity do occur, mostly related to the  
845 presence of smaller-bodied crocodylians in the Palaeogene (such as *Tsoabichi* [150]).

846         We characterised the macroevolutionary patterns that gave rise to these patterns  
847 of body size disparity through time, by performing comparative model-fitting analyses.  
848 Our results indicate a strong support found for a multi-peak OU model (i.e., the  
849 SURFACE model; Fig. 2a and b). Within the concept of adaptive landscape [73, 74,  
850 75], we can interpret the SURFACE regimes, with different trait optima, as similar to  
851 shifts to new macroevolutionary adaptive zones [11, 151]. Thus, the support found for  
852 the SURFACE model indicates that lineage-specific adaptations related to body size  
853 play an important role in determining the patterns of crocodylomorph body size  
854 evolution. Our comparative model-fitting analyses also indicate that uniform OU  
855 models, BM models, and both uniform and multi-regime trend models provide poor  
856 explanations for the overall patterns of crocodylomorph body size evolution.

857         Our findings reject the hypothesis of long-term, multi-lineage trends during the  
858 evolution of crocodylomorph body size. This is true even for Crocodylia, which shows  
859 increases in maximum, minimum and mean body sizes during the past 70 million years  
860 (Fig. 8a), a pattern that is classically taken as evidence for trend-like dynamics [56]. In  
861 fact, explicitly phylogenetic models of the dynamics along evolving lineages reject this.

862 We can also reject diffusive, unconstrained Brownian-motion like dynamics for  
863 most of Crocodylomorpha, although Notosuchia might be characterised by relatively  
864 unconstrained dynamics (Fig. 6). Single-regime (=uniform) models received poor  
865 support in general, which might be expected for long-lived and disparate clades such as  
866 Crocodylomorpha, which show complex and non-uniform patterns of body size  
867 evolution (see [5, 11, 58, 61]). Although multi-regime trend-like models received  
868 stronger support than uniform models for most phylogenies (Fig. 2a and b), multi-peak  
869 OU models (SURFACE) received overwhelmingly still greater support. This suggests  
870 that the macroevolutionary landscape of crocodylomorph body size evolution is best  
871 described by shifts between phylogenetically defined regimes that experience  
872 constrained evolution around distinct trait optima [61, 71, 75, 83].

873 The success of a multi-peak OU model indicates that, in general, a significant  
874 amount of crocodylomorph body size variance emerged through pulses of body size  
875 variation, and not from a gradual, BM-based dispersal of lineages through trait (body  
876 size) space. These pulses, represented by regime shifts, represent excursions of single  
877 phylogenetic lineages through body size space, resulting in the founding of new clades  
878 with distinct body size from their ancestors. This indicates that lineage-specific  
879 adaptations (such as those related to ecological diversification; see below) are an  
880 important aspect of the large-scale patterns of crocodylomorph body size evolution.

881 This can also explain the weak support found for the early burst (EB) model in  
882 our analyses. The early burst model attempts to simulate Simpson's [73] idea of  
883 diversification through "invasion" of new adaptive zones (niche-filling). It focuses on a  
884 particular pattern of adaptive radiation, with evolutionary rates higher in the early  
885 evolution of a clade and decelerating through time [126]. Other models have also been  
886 proposed to better represent the concept of pulsed Simpsonian evolution (e.g., [152]).

887 Our results show that, overall, the EB model offers a poor explanation for the evolution  
888 of body size in crocodylomorphs, in agreement with previous works that suggested that  
889 early bursts of animal body size receive little support from phylogenetic comparative  
890 methods ([126], but see [153] for intrinsic issues for detecting early bursts from extant-  
891 only datasets). However, rejection of an early burst model does not reject Simpson’s  
892 hypothesis that abrupt phenotypic shifts along evolving lineages (“quantum evolution”)  
893 results from the distribution of opportunities (adaptive zones, or unfilled niches).  
894 Patterns of crocodylomorph body size evolution could still be explained by this “niche-  
895 filling” process if opportunities were distributed through time rather than being  
896 concentrated early on the evolution of the clade. This is one possible explanation of the  
897 pattern of regime shifts returned by our analyses, and might be particularly relevant for  
898 clades with long evolutionary histories spanning many geological intervals and  
899 undergoing many episodes of radiation.

900 Bronzati et al. [35] examined variation in rates of species diversification among  
901 clades using methods based on tree asymmetry. They found that most of crocodyliform  
902 diversity was achieved by a small number of significant diversification events that were  
903 mostly linked to the origin of some subclades, rather than via a continuous process  
904 through time. Some of the diversification shifts from Bronzati et al. [35] coincide with  
905 body size regime shifts found in many of our SURFACE model fits (such as at the base  
906 of Notosuchia, Eusuchia and Alligatoroidea; Fig. 9). However, many of the shifts in  
907 body size regimes detected by our analyses are found in less-inclusive groups (as in the  
908 case of “singleton” regimes, that contain only a single taxon).

909

910

911 *Ecological diversification and its implications for crocodylomorph body size*

912 *distribution*

913 Ecological factors seem to be important for the large-scale patterns of body size in  
914 crocodylomorphs. Many of the regime shifts to larger sizes detected by our SURFACE  
915 analyses occur at the base of predominantly aquatic or semi-aquatic clades, such as  
916 Thalattosuchia, Tethysuchia and Crocodylia (Figs. 3, 4, and 5), although small-bodied  
917 aquatic/semi-aquatic clades also occur, such as Atoposauridae. Some terrestrial clades  
918 also display relatively large sizes (such as sebecosuchians and peirosaurids, within  
919 Notosuchia). However, most terrestrial species are small-bodied (Fig. 10b), including  
920 many of the earliest crocodylomorphs (such as *Litargosuchus leptorhynchus* and  
921 *Hesperosuchus agilis* [50, 51]; Fig. 10a), and are within body size regimes of lower  
922 values of  $\theta$  ( $< 150$  cm; Figs. 3, 4, and 5). In contrast, the regimes with the highest values  
923 of  $\theta$  ( $> 800$  cm) are almost always associated with aquatic or semi-aquatic  
924 crocodylomorphs (e.g., the tethysuchians *Sarcosuchus imperator* and *Chalawan*  
925 *thailandicus*, the thalattosuchians *Machimosaurus* and *Steneosaurus*, and the  
926 crocodylians *Purussaurus* and *Mourasuchus*).

927       Previous studies have investigated a possible link between an aquatic/marine  
928 lifestyle and larger body sizes in other animals, particularly in mammals (e.g., [17, 21,  
929 24]). For instance, it has been previously shown that aquatic life in mammals imposes a  
930 limit to minimum body size [24, 154] and relaxes constraints on maximum size [155].  
931 Therefore, aquatic mammals (especially marine ones) have larger body sizes than their  
932 terrestrial relatives [21, 156]. We document a similar pattern in crocodylomorphs (Table  
933 3), although the phylogenetic ANOVA results revealed that changes in size are not  
934 abrupt after environmental invasions (as also suggested by the diminutive size of some  
935 semiaquatic lineages, such as atoposaurids and some crocodylians). Animals lose heat

936 faster in water than in air (given the different rates of convective heat loss in these two  
937 environments), and it has demonstrated that thermoregulation plays an important role in  
938 determining the larger sizes of aquatic mammals [24, 154, 157]. Although mammals  
939 have distinct thermal physiology to crocodylomorphs (which are ectothermic  
940 poikilotherms), it has been reported that American alligators (*Alligator mississippiensis*)  
941 heat up more rapidly than cool down, and that larger individuals are able to maintain  
942 their inner temperature for longer than smaller ones [158]. Thus, given that both heating  
943 and cooling rates are higher in water than in air [158], larger aquatic/semi-aquatic  
944 animals could have advantages in terms of physiological thermoregulation. If extinct  
945 crocodylomorphs had similar physiologies, this could provide a plausible explanation  
946 for the larger sizes of non-terrestrial species.

947

948 *Cope's rule cannot explain the evolution of larger sizes in Crocodylomorpha*

949 Previous interpretations of the fossil record suggest a dominance of small sizes during  
950 the early evolution of crocodylomorphs [45, 117], inferred from the small body sizes of  
951 most early crocodylomorphs. Consistent with this, our SURFACE results revealed a  
952 small-bodied ancestral regime for Crocodylomorpha ( $Z_0$  between 66 and 100 cm),  
953 which was inherited virtually by all non-crocodyliform crocodylomorphs. Larger non-  
954 crocodyliform crocodylomorphs have also been reported for the Late Triassic (e.g.,  
955 *Carnufex carolinensis* and *Redondavenator quayensis*, with estimated body lengths of  
956 approximately 3 metres [159]), but the fragmentary nature of their specimens prevented  
957 us from including them in our macroevolutionary analysis. Nevertheless, given the  
958 larger numbers of small-bodied early crocodylomorphs, taxa like *Carnufex* and  
959 *Redondavenator* probably represent derived origins of large body size and their  
960 inclusion would likely result in similar values of ancestral trait optima ( $=Z_0$ ).

961           The small ancestral body size inferred for crocodylomorphs, combined with the  
962 much larger sizes seen in most extant crocodylians and in some other crocodylomorph  
963 subclades (such as thalattosuchians and tethysuchians), suggests a pattern of increasing  
964 average body size during crocodylomorph evolutionary history. This idea is reinforced  
965 by the overall increase in crocodylomorph mean body size through time, particularly  
966 after the Early Cretaceous (Fig. 8a). The same pattern also occurs within Crocodylia  
967 during the past 70 million years (Fig. 8a), as some of the earliest taxa (such as  
968 *Tsoabichi*, *Wannaganosuchus* and *Diplocynodon deponiae*) were smaller-bodied (< 2m)  
969 than more recent species, such as most extant crocodylians (usually > 3m). Cope's rule  
970 is most frequently conceived as the occurrence of multi-lineage trends of directional  
971 evolution towards larger body sizes [7, 8, 11], and this can be evaluated using BM-  
972 based models that incorporate a directional trend (parameter  $\mu$  [80]; see e.g., [33, 62]).

973           We find little support for trend-like models as a description of crocodylomorph  
974 or crocodylian body size evolution. Therefore, we reject the applicability of Cope's rule  
975 to crocodylomorph evolution. This reinforces previous works suggesting that multi-  
976 lineage trends of directional body-size evolution are rare over macroevolutionary time  
977 scales [33, 67, 160, 161] (but see [19]). Furthermore, our SURFACE model fits indicate  
978 that regime shifts towards smaller-bodied descendent regimes occurred approximately  
979 as frequently (12–13 times) as shifts to regimes of larger body sizes (10–14 times; Fig.  
980 11), when considering shifts that led to both clades containing multiple and single taxa.  
981 Together, these results indicate that long-term increases in the average body size of  
982 crocodylomorphs also cannot be explained either by multi-lineage trends of directional  
983 evolution towards larger size, or by a biased frequency of transitions to large-bodied  
984 descendent regimes.



985           Instead, the apparent trend towards larger body sizes can be explained by  
986   extinctions among small-bodied regimes. Crocodylomorph body size disparity  
987   decreased gradually through the Cretaceous (Fig. 8b). This occurred due to the  
988   decreasing abundance of small-bodied species. Despite this, our SURFACE model fits  
989   mostly indicate the survival of clades exhibiting small-bodied regimes ( $\theta < 200$  cm)  
990   until approximately the end of the Mesozoic, (e.g., gobiosuchids, uruguaysuchids,  
991   sphagesaurids, hylaeochampsids and some allodaposuchids; Figs. 3, 4, and 5). Many of  
992   these small-bodied clades became extinct at least by the Cretaceous/Palaeogene (K/Pg)  
993   boundary, resulting in a substantial reduction of small-bodied species. Further  
994   reductions among the crown-group (Crocodylia) occurred by the Neogene, from which  
995   small-bodied species are absent altogether (Figs. 3, 4, and 5).

996           This predominance of regimes of large sizes today results from the occurrence of  
997   large body sizes in the crown-group, Crocodylia. Our SURFACE analyses focusing on  
998   Crocodylia indicate ancestral body size regimes with relatively high values of  $\theta$  ( $Z_0$   
999   between 220 and 350 cm). The shift to a larger-sized regime (when compared to  
1000   smaller-bodied eusuchian regimes) probably occurred at the Late Cretaceous (Figs. 3, 4,  
1001   and 5), and this same regime was inherited by many members of the clade  
1002   (predominantly semi-aquatic species). During the Palaeogene, however, shifts to  
1003   regimes of smaller sizes also occurred (such as in *Tsoabichi greenriverensis*,  
1004   *Diplocynodon deponiae* and planocraniids), increasing total body size disparity (Fig.  
1005   8b). The crocodylian body size distribution shifted upwards mainly during the latter part  
1006   of the Cenozoic (from the Miocene; Fig. 8b), when even larger-bodied animals occurred  
1007   (e.g., *Purussaurus* and *Mourasuchus*), combined with the disappearance of lineages of  
1008   smallest species.

1009

1010 *Correlation of crocodylian body size with global cooling*

1011 Our time series regressions demonstrate a moderate to strong correlation between  
1012 crocodylian size and palaeotemperature (from the Late Cretaceous until the Recent;  
1013 Table 2). This results from the upward-shift of the crocodylian body size distribution,  
1014 coinciding with cooling global climates in the second half of the Cenozoic [131, 162].  
1015 Even though this is an apparently counter-intuitive relationship, we do not interpret it as  
1016 a result of direct causation. Previous studies have shown that crocodylian species  
1017 richness decreased with declining global temperatures of the Cenozoic [36, 37].  
1018 Furthermore, the palaeolatitudinal ranges of both marine and continental  
1019 crocodylomorphs have contracted as temperatures decreased (Fig. 7b; see also [36, 37]).  
1020 Therefore, the temperatures experienced by evolving lineages of crocodylians are not  
1021 equivalent to global average temperatures. We propose that the association between  
1022 global cooling and increasing crocodylian body size results from a systematic reduction  
1023 of available habits/niches (due to a more restricted geographical distribution), with  
1024 differential extinction of smaller-bodied species. The hypothesis of selective extinction  
1025 is also consistent with the decreasing in crocodylian body size disparity during the  
1026 Cenozoic (Fig. 8b).

1027

1028 *Body size selectivity and diversification across Mesozoic boundaries*

1029 Numerous comparative studies have investigated a possible link between extinction risk  
1030 and animal body size (e.g., [163, 164, 165, 166, 167]). For example, larger body sizes,  
1031 in association with dietary specializations, might increase susceptibility to extinction in  
1032 some animal groups, such as hypercarnivorous canids [168, 169]. On the other hand, the  
1033 recovery of some animal clades after extinction events can also be associated with a  
1034 subsequent increase in diversity and morphological disparity (e.g., Palaeogene  
1035 mammals [14]), potentially leading to the exploration of new regions of body size space

1036 (i.e., invasions of new body size regimes). Thus, although for some groups (and for  
1037 some extinctions) body size might play an important role, this is evidently not a  
1038 generalised pattern across all animals.

1039 For crocodylomorphs, little is known about possible influence of body size on  
1040 differential extinction. In one of the few studies to quantitatively investigate this, Turner  
1041 & Nesbitt [45], using femoral length as a proxy for total body size, recognized a drop in  
1042 mean body size of crocodylomorphs across the Triassic-Jurassic (T–J) boundary. Our  
1043 SURFACE results, however, indicate otherwise, as all Triassic crocodylomorphs are  
1044 within a macroevolutionary regime of smaller sizes ( $\theta < 100$  cm) when *Thalattosuchia*  
1045 is placed within Neosuchia (Fig. 3 and 4). In the other two phylogenetic scenarios, the  
1046 origin of thalattosuchians (which are predominantly large-bodied animals) is placed  
1047 either at the middle of the Late Triassic or closer to the T–J boundary (Fig. 5). However,  
1048 as the first records of thalattosuchians only occur in the Early Jurassic, mean body size  
1049 increases immediately after the boundary (Fig. 8a). The differences between our results  
1050 and those found by Turner & Nesbitt [45] might be related to the distinct body size  
1051 proxies used or to the different taxon sample used, as those authors also included non-  
1052 crocodylomorph pseudosuchians in their analysis. In this context, we acknowledge that  
1053 the inclusion in our analyses of larger non-crocodyliform crocodylomorphs, such as  
1054 *Carnufex carolinensis* (~ 3 metres [159]), might change our results. Thus, at the  
1055 moment we do not have empirical or statistical evidence to demonstrate selectivity of  
1056 body sizes in crocodylomorphs during the end-Triassic extinction.

1057 The Early Jurassic was characterized by key events of crocodylomorph  
1058 diversification [35] and an increase in morphological disparity [42], following the end-  
1059 Triassic extinction. Similarly, our body size data suggests an increase in body size  
1060 disparity after the T–J boundary (Fig. 8b). Although a decrease in disparity is observed

1061 subsequently, this is probably due to the relatively few crocodylomorphs known for the  
1062 latest Early Jurassic and the Middle Jurassic (Sinemurian–Aalenian [36]). Subsequently,  
1063 the diversification of thalattosuchians during the Late Jurassic, together with the  
1064 occurrence of smaller- to intermediate-bodied neosuchians (such as atoposaurids and  
1065 goniopholidids), created the greatest observed disparity of crocodylomorph body sizes  
1066 during their evolutionary history (Fig. 8b).

1067         Recent studies [170, 171, 172] suggested that a combination of environmental  
1068 perturbations occurred during the Jurassic-Cretaceous (J/K) transition, which might  
1069 have led to the extinction of some tetrapod lineages. For crocodylomorphs the boundary  
1070 is characterised by a decrease in marine diversity [36, 171, 172], highlighted by declines  
1071 in thalattosuchian diversity, especially among teleosaurids, which suffered widespread  
1072 extinction (except, apparently, at lower palaeolatitudes [173]). Nevertheless, Wilberg  
1073 [43] did not find evidence for a substantial decrease in crocodylomorph cranial disparity  
1074 across the J/K boundary. Similarly, our SURFACE results do not suggest dramatic  
1075 changes in body size space exploration immediately before or after the J/K boundary  
1076 (Figs. 3, 4, and 5), and there seems to be no defined body size selectivity across this  
1077 boundary, as the multiple survivor crocodylomorph lineages were within regimes of  
1078 very disparate optima values. Furthermore, the decrease in disparity observed in the  
1079 middle of the Early Cretaceous (i.e., Valanginian–Barremian) is likely due to poor  
1080 sampling [174], resulting in the scarcity of more completely preserved crocodylomorphs  
1081 during these stages.

1082         The Late Cretaceous is marked by a remarkable fossil richness of notosuchians,  
1083 in Gondwana [175, 176], and the diversification of eusuchian crocodylians [177].  
1084 Notosuchia exhibits a wide range of body sizes (Fig. 10a), to some extent reflecting its  
1085 remarkable diversity [36, 176] and morphological disparity [43, 44]. Our model-fitting

1086 analyses using only notosuchian data suggest more relaxed modes of body size  
1087 evolution in Notosuchia (Fig. 6), which is consistent with their high species richness  
1088 and morphological disparity. This could be explained by a combination of intrinsic (i.e.,  
1089 innovations and/or adaptations, such as a highly modified feeding apparatus [178, 179])  
1090 and extrinsic factors (i.e., specific environmental conditions, such as the predominantly  
1091 hot and arid climate of the Gondwanan landmasses occupied by notosuchians [36,  
1092 175]).

1093       Even though our body size data show no specific pattern at the K/Pg boundary, a  
1094 decline in body size disparity is present through the Late Cretaceous, combined with an  
1095 increase in mean body size (Fig. 8), a pattern that generally continued through the  
1096 Cenozoic (although with some short-term fluctuations). This supports the hypothesis  
1097 that the K/Pg extinction had only minor impacts on crocodylomorphs [35, 36, 37, 43,  
1098 181]. Although subsampled estimates of genus richness suggest a decline in terrestrial  
1099 crocodylomorph diversity during the Late Cretaceous, this occurred prior to the K/Pg  
1100 boundary, between the Campanian into the Maastrichtian, in both Europe and North  
1101 America [36]. Indeed, several crocodylomorph subclades lost several species prior to  
1102 the end of the Cretaceous (in particular notosuchians and non-crocodylian eusuchians  
1103 [35, 36]; Figs. 3, 4, and 5), and multiple lineages within other groups, such as  
1104 dyrosaurid tethysuchians and crocodylians, crossed the boundary with little change [37,  
1105 180, 181] (Figs. 3, 4, and 5). Our data suggest a long-term pattern of selective  
1106 extinctions of small-bodied crocodylomorphs, starting from the Late Cretaceous and  
1107 continuing to the Recent. This may have resulted from a longstanding trend of global  
1108 cooling [131, 162], resulting in more restricted geographical distributions, and reducing  
1109 niche availability for crocodylomorphs. This is consistent with our SURFACE results  
1110 (Figs. 3, 4, and 5), that show very few smaller-bodied regimes ( $\theta < 150$  cm) during the

1111 Palaeogene and a complete absence after the Neogene. This pattern strikingly contrasts  
1112 with that proposed for mammals, which may have experienced selectivity against larger  
1113 bodied taxa across the K/Pg boundary [182], although an increase in body size occurred  
1114 observed subsequently, during the Palaeogene [14, 15]. The pattern of survival in  
1115 crocodylomorphs also differs from that suggested for squamates (lizards and snakes), in  
1116 which small-bodied taxa show evidence of preferential survival [183].

1117

## 1118 **Conclusions**

1119 After an early increase (with the highest peak in the Late Jurassic), crocodylomorph  
1120 body size disparity experienced sustained decline during virtually its entire evolutionary  
1121 history. This disparity decrease is combined with an increase of average body size  
1122 through time, with highest peaks in the Middle Jurassic and today. In particular, the  
1123 increase in mean body size seen during the Cenozoic (mostly related to crocodylians)  
1124 co-occurs with an overall decrease in global temperatures.

1125 To further characterise these patterns, we used comparative model-fitting  
1126 analyses for assessing crocodylomorph body size evolution. Our results show extremely  
1127 strong support for a multi-peak Ornstein-Uhlenbeck model (SURFACE), rejecting the  
1128 hypothesis of evolution based on Brownian motion dynamics (including those  
1129 representing the concept of Cope's rule). This suggests that crocodylomorph body size  
1130 evolution can be described within the concept of a macroevolutionary adaptive  
1131 landscape, with a significant amount of crocodylomorph body size variance evolving  
1132 from pulses of body size changes, represented by shifts between macroevolutionary  
1133 regimes (similar to adaptive zones or "maximum adaptive zones" of Stanley [11]). This  
1134 is reflected in the regime shifts frequently detected at the base of well-recognised and  
1135 diverse crocodylomorph subclades such as Notosuchia, Thalattosuchia, and Crocodylia.

1136           We did not find strong correlations between our body size data and abiotic  
1137 factors, indicating that shifts between macroevolutionary regimes are more important  
1138 for determining large-scale patterns of crocodylomorph body size than isolated climatic  
1139 factors. However, at more refined temporal and phylogenetic scales, body size variation  
1140 may track changes in climate. In the case of Crocodylia, a global cooling event might  
1141 explain the long-term increases in body size, as a result of systematic reduction of  
1142 available habits/niches (due to a more latitudinally-restricted geographical distribution  
1143 during cooler global climates), with preferential extinction of smaller-bodied species.

1144           Shifts towards larger sizes are often associated with aquatic/marine or semi-  
1145 aquatic subclades, indicating that ecological diversification may also be relevant, and  
1146 suggesting a possible link between aquatic adaptations and larger body sizes in  
1147 crocodylomorphs. These shifts to larger sizes, occurred throughout crocodylomorph  
1148 evolutionary history, combined with the extinction of smaller-sized regimes,  
1149 particularly during the Late Cretaceous and Cenozoic, explain the overall increase in  
1150 mean body size, as well as the large-bodied distribution of extant crocodylians (all of  
1151 which are aquatic or semi-aquatic) compared to smaller-bodied early taxa.

1152

1153

1154

1155

1156

1157

1158

1159

1160

1161 **Abbreviations**

1162 Cranial measurements:

1163 **DCL:** dorsal cranial length

1164 **ODCL:** orbito-cranial length

1165 Evolutionary models:

1166 **BM:** Brownian motion

1167 **EB:** Early burst

1168 **OU:** Ornstein-Uhlenbeck

1169 **BMS:** multi-regime BM model that allows parameter  $\sigma^2$  to vary

1170 **OUMV:** multi-regime OU model that allows  $\theta$  and  $\sigma^2$  to vary

1171 **OUMA:** multi-regime OU model in which  $\theta$  and  $\alpha$  can vary

1172 **OUMVA:** OU model in which all three parameters ( $\theta$ ,  $\alpha$  and  $\sigma^2$ ) can vary

1173 Model parameters:

1174  **$\theta$ :** trait optimum of OU-based models

1175  **$\alpha$ :** attraction parameter of OU-based models;

1176  **$\sigma^2$ :** Brownian variance or rate parameter of BM or OU-based models

1177  **$\mu$ :** evolutionary trend parameter of BM-based models

1178  **$Z_0$ :** estimated trait value at the root of the tree of OU-based models

1179 Optimality criteria:

1180 **AIC:** Akaike's information criterion

1181 **AICc:** Akaike's information criterion for finite sample sizes

1182 **BIC:** Bayesian information criterion

1183 **pBIC:** phylogenetic Bayesian information criterion

1184

1185



1186 **Declarations**

1187 **Acknowledgements**

1188 Access to fossil collections was possible thanks to Lorna Steel (NHMUK), Eliza  
1189 Howlett (OUMNH), Matthew Riley (CAMSM), Zoltán Szentesi (MTM), Attila Ósi  
1190 (MTM), Ronan Allain (MNH), Rainer Schoch (SMNS), Erin Maxwell (SMNS),  
1191 Marisa Blume (HLMD), Eberhard Frey (SMNK), Oliver Rauhut (BSPG), Max Langer  
1192 (LPRP/USP), Sandra Tavares (MPMA), Fabiano Iori (MPMA), Thiago Marinho (CPP),  
1193 Jaime Powell (PVL), Rodrigo Gonzáles (PVL), Martín Ezcurra (MACN), Stella Alvarez  
1194 (MACN), Alejandro Kramarz (MACN), Patricia Holroyd (UCMP), Kevin Padian  
1195 (UCMP), William Simpson (FMNH), Akiko Shinya (FMNH), Paul Sereno (UCRC),  
1196 Tayler Keillor (UCRC), Mark Norell (AMNH), Carl Mehling (AMNH), Judy Galkin  
1197 (AMNH), Alan Turner (SUNY), Liu Jun (IVPP), Corwin Sullivan (IVPP), Zheng Fang  
1198 (IVPP), Anna K. Behrensmeyer (USNM), and Amanda Millhouse (USNM). Felipe  
1199 Montefeltro, Andrew Jones and Giovanna Cidade also provided photographs of many  
1200 crocodylomorph specimens.

1201 We are thankful to Gene Hunt, whose R functions and scripts (particularly for  
1202 fitting multi-trend models and SURFACE with pBIC) greatly benefited this study. We  
1203 further thank Gemma Benevento, Luke Parry, Dave Bapst, and Alan Turner for  
1204 assistance with the FBD tip-dating method. We also thank Emma Dunne, Daniel  
1205 Cashmore, and Andrew Jones for help and discussion at different stages of this project,  
1206 especially related to the use of R. Thorough reviews by two anonymous reviewers  
1207 helped improve the manuscript. We thank the editor R. Alexander Pyron for handling  
1208 the manuscript. Silhouettes of crocodylomorph representatives in figures are from  
1209 illustrations by Dmitry Bogdanov, Smokeybjb, and Nobumichi Tamura, hosted at  
1210 Phylopic (<http://phylopic.org>), where license information is available.

1211

1212 **Funding**

1213 PLG was supported by a University of Birmingham-CAPES Joint PhD Scholarship  
1214 (grant number: 3581-14-4). Additional funding for data collection was provided by the  
1215 Doris O. and Samuel P. Welles Research Fund of the University of California's Museum  
1216 of Paleontology (UCMP). MB was supported by the Conselho Nacional de  
1217 Desenvolvimento Científico e Tecnológico (CNPq; grant number: 170867/2017-0).  
1218 Parts of this work were funded by the European Union's Horizon 2020 research and  
1219 innovation programme 2014–2018, under grant agreement 677774 (ERC Starting Grant:  
1220 TEMPO) to RBB and grant agreement 637483 (ERC Starting Grant: TERRA) to RJB.  
1221 The funders had no role in the design of the study, data collection, analysis and  
1222 interpretation of data, or in writing the manuscript.

1223

1224 **Availability of data and material**

1225 The data generated and/or analysed during the current study, as well as R codes used for  
1226 macroevolutionary analyses and supplementary results, are included within the article  
1227 and its additional files.

1228

1229 **Authors' contributions**

1230 PLG, RBB and RJB designed the study. PLG and MB collected the data. PLG analysed  
1231 the data. All authors participated in drafting the manuscript. All authors read and  
1232 approved the final manuscript.

1233

1234 **Competing interests**

1235 The authors declare that they have no competing interests.

1236

1237 **Consent for publication**

1238 Not applicable.

1239

1240 **Ethics approval and consent to participate**

1241 Not applicable.

1242

1243 **References**

1244 1. Hutchinson GE, MacArthur RH. A theoretical ecological model of size  
1245 distributions among species of animals. *Am Nat.* 1959;93:117–25.

1246 2. Peters RH: *The Ecological Implications of body size.* New York: Cambridge  
1247 University Press; 1983.

1248 3. Calder WAI: *Size, Function, and Life History.* Cambridge: Harvard University  
1249 Press; 1984.

1250 4. Schmidt-Nielsen K: *Scaling: Why is animal size so important?* Cambridge:  
1251 Cambridge University Press; 1984.

1252 5. McKinney ML. Trends in body size evolution. In: McNamara KJ, editor.  
1253 *Evolutionary trends.* Tucson: University of Arizona Press; 1990. p. 75–118.

1254 6. McClain CR, Boyer AG. Biodiversity and body size are linked across  
1255 metazoans. *Proc R Soc B-Biol Sci.* 2009;276:2209–15.

1256 7. Cope ED. *The origin of the fittest: essays on evolution.* New York: D. Appleton  
1257 and Company; 1887.

- 1258 8. Cope ED. The primary factors of organic evolution. Chicago: Open Court Press;  
1259 1896.
- 1260 9. Depéret CJJ. The transformations of the animal world. New York: D. Appleton  
1261 and Company; 1909.
- 1262 10. Newell ND. Phyletic size increase, an important trend illustrated by fossil  
1263 invertebrates. *Evolution*. 1949;3:103–24.
- 1264 11. Stanley SM. An explanation for Cope's rule. *Evolution*. 1973;27:1–26.
- 1265 12. Price SA, Hopkins SS. The macroevolutionary relationship between diet and  
1266 body mass across mammals. *Biol J Linnean Soc*. 2015;115:173–84.
- 1267 13. Raup DM. Testing the fossil record for evolutionary progress. In: Nitecki MH,  
1268 editor. *Evolutionary progress*. Chicago: University of Chicago Press; 1988. p. 293–317.
- 1269 14. Alroy J. Cope's rule and the dynamics of body mass evolution in North  
1270 American fossil mammals. *Science*. 1998;280:731–4.
- 1271 15. Smith FA, Boyer AG, Brown JH, Costa DP, Dayan T, Ernest SM, Evans AR,  
1272 Fortelius M, Gittleman JL, Hamilton MJ, et al. The evolution of maximum body size of  
1273 terrestrial mammals. *Science*. 2010;330:1216–9.
- 1274 16. Venditti C, Meade A, Pagel M. Multiple routes to mammalian diversity. *Nature*.  
1275 2011;479:393–6.
- 1276 17. Heim NA, Knope ML, Schaal EK, Wang SC, Payne JL. Cope's rule in the  
1277 evolution of marine animals. *Science*. 2015;347:867–70.

- 1278 18. Laurin M. The evolution of body size, Cope's rule and the origin of amniotes.  
1279 Syst Biol. 2004;53:594–622.
- 1280 19. Benson RBJ, Frigot RA, Goswami A, Andres B, Butler RJ. Competition and  
1281 constraint drove Cope's rule in the evolution of giant flying reptiles. Nat Commun.  
1282 2014;5:3567.
- 1283 20. Alberdi MT, Prado JL, Ortiz-Jaureguizar E. Patterns of body size changes in  
1284 fossil and living Equini (Perissodactyla). Biol J Linnean Soc. 1995;54:349–70.
- 1285 21. Smith FA, Lyons SK. How big should a mammal be? A macroecological look at  
1286 mammalian body size over space and time. Philos Trans R Soc Lond B-Biol Sci.  
1287 2011;366:2364–78.
- 1288 22. Saarinen JJ, Boyer AG, Brown JH, Costa DP, Ernest SM, Evans AR, Fortelius  
1289 M, Gittleman JL, Hamilton MJ, Harding LE, et al. Patterns of maximum body size  
1290 evolution in Cenozoic land mammals: eco-evolutionary processes and abiotic forcing.  
1291 Proc R Soc B-Biol Sci. 2014;281:20132049.
- 1292 23. Churchill M, Clementz MT, Kohno N. Cope's rule and the evolution of body  
1293 size in Pinnipedimorpha (Mammalia: Carnivora). Evolution. 2015;69:201–15.
- 1294 24. Gearty W, McClain CR, Payne JL. Energetic tradeoffs control the size  
1295 distribution of aquatic mammals. Proc Natl Acad Sci USA. 2018;115:4194–9.
- 1296 25. Burness GP, Diamond J, Flannery T. Dinosaurs, dragons, and dwarfs: the  
1297 evolution of maximal body size. Proc Natl Acad Sci USA. 2001;98:14518–23.
- 1298 26. Hone DWE, Dyke GJ, Haden M, Benton MJ. Body size evolution in Mesozoic  
1299 birds. J Evol Biol. 2008;21:618–24.

- 1300 27. Carrano MT. Body-size evolution in the Dinosauria. In: Carrano MT, Blob RW,  
1301 Gaudin T, Wibble JR, editors. Amniote paleobiology: perspectives on the evolution of  
1302 mammals, birds, and reptiles. Chicago: University of Chicago Press; 2006. p. 225–68.
- 1303 28. Turner AH, Pol D, Clarke JA, Erickson GM, Norell MA. A basal dromaeosaurid  
1304 and size evolution preceding avian flight. *Science*. 2007;317:1378–81.
- 1305 29. Butler RJ, Goswami A. Body size evolution in Mesozoic birds: little evidence  
1306 for Cope's rule. *J Evol Biol*. 2008;21:1673–82.
- 1307 30. Lee MS, Cau A, Naish D, Dyke GJ. Sustained miniaturization and anatomical  
1308 innovation in the dinosaurian ancestors of birds. *Science*. 2014;345:562–566.
- 1309 31. Benson RBJ, Campione NE, Carrano MT, Mannion PD, Sullivan C, Upchurch  
1310 P, Evans DC. Rates of dinosaur body mass evolution indicate 170 million years of  
1311 sustained ecological innovation on the avian stem lineage. *PLoS Biol*.  
1312 2014;12:e1001853.
- 1313 32. Carballido JL, Pol D, Otero A, Cerda IA, Salgado L, Garrido AC, Ramezani J,  
1314 Cúneo NR, Krause JM. A new giant titanosaur sheds light on body mass evolution  
1315 among sauropod dinosaurs. *Proc R Soc B-Biol Sci*. 2017;284:20171219.
- 1316 33. Benson RBJ, Hunt G, Carrano MT, Campione N. Cope's rule and the adaptive  
1317 landscape of dinosaur body size evolution. *Palaeontology*. 2018;61:13–48.
- 1318 34. Bronzati M, Montefeltro FC, Langer MC. A species-level supertree of  
1319 Crocodyliformes. *Hist Biol*. 2012;24:598–606.

- 1320 35. Bronzati M, Montefeltro FC, Langer MC. Diversification events and the effects  
1321 of mass extinctions on Crocodyliformes evolutionary history. *R Soc Open Sci.*  
1322 2015;2:140385.
- 1323 36. Mannion PD, Benson RBJ, Carrano MT, Tennant JP, Judd J, Butler RJ. Climate  
1324 constrains the evolutionary history and biodiversity of crocodylians. *Nat Commun.*  
1325 2015;6:8438.
- 1326 37. Markwick PJ. Crocodylian diversity in space and time: the role of climate in  
1327 paleoecology and its implication for understanding K/T extinctions. *Paleobiology.*  
1328 1998;24:470–97.
- 1329 38. Langston W. The crocodylian skull in historical perspective. In: Gans C, Parsons  
1330 TS, editors. *Biology of the Reptilia*. London: Academic Press; 1973 p. 263–84.
- 1331 39. Brochu CA. Crocodylian snouts in space and time: phylogenetic approaches  
1332 toward adaptive radiation. *Am Zool.* 2001;41:564–85.
- 1333 40. Sadleir RW, Makovicky PJ. Cranial shape and correlated characters in  
1334 crocodylian evolution. *J Evol Biol.* 2008;21:1578–96.
- 1335 41. Stubbs TL, Pierce SE, Rayfield EJ, Anderson PS. Morphological and  
1336 biomechanical disparity of crocodile-line archosaurs following the end-Triassic  
1337 extinction. *Proc R Soc B-Biol Sci.* 2013;280:20131940.
- 1338 42. Toljagić O, Butler RJ. Triassic–Jurassic mass extinction as trigger for the  
1339 Mesozoic radiation of crocodylomorphs. *Biol Lett.* 2013;9:20130095.
- 1340 43. Wilberg EW. Investigating patterns of crocodyliform cranial disparity through  
1341 the Mesozoic and Cenozoic. *Zool J Linn Soc.* 2017;181:189–208.

- 1342 44. Godoy PL, Ferreira GS, Montefeltro FC, Vila Nova BC, Butler RJ, Langer MC.  
1343 Evidence for heterochrony in the cranial evolution of fossil crocodyliforms.  
1344 Palaeontology. 2018;61:543–58.
- 1345 45. Turner AH, Nesbitt SJ. Body size evolution during the Triassic archosauriform  
1346 radiation. Geol Soc Spec Publ. 2013;379:573–97.
- 1347 46. Young MT, Bell MA, Andrade MB, Brusatte SL. Body size estimation and  
1348 evolution in metriorhynchid crocodylomorphs: implications for species diversification  
1349 and niche partitioning. Zool J Linn Soc. 2011;163:1199–216.
- 1350 47. Allsteadt J, Lang JW. Incubation temperature affects body size and energy  
1351 reserves of hatchling American alligators (*Alligator mississippiensis*). Physiol Zool.  
1352 1995;68:76–97.
- 1353 48. Markwick PJ. Fossil crocodylians as indicators of Late Cretaceous and Cenozoic  
1354 climates: implications for using palaeontological data in reconstructing palaeoclimate.  
1355 Palaeogeogr Palaeocl. 1998;137:205–71.
- 1356 49. Delfino M, de Vos J. A giant crocodile in the Dubois Collection from the  
1357 Pleistocene of Kali Gedeh (Java). Integr Zool. 2014;9:141–7.
- 1358 50. Clark JM, Sues HD. Two new basal crocodylomorph archosaurs from the Lower  
1359 Jurassic and the monophyly of the Sphenosuchia. Zool J Linn Soc. 2002;136:77–95.
- 1360 51. Clark JM, Sues HD, Berman DS. A new specimen of *Hesperosuchus agilis* from  
1361 the Upper Triassic of New Mexico and the interrelationships of basal crocodylomorph  
1362 archosaurs. J Vertebr Paleontol. 2001;20:683–704.



- 1363 52. Erickson GM, Brochu CA. How the ‘terror crocodile’ grew so big. *Nature*.  
1364 1999;398:205–6.
- 1365 53. Sereno PC, Larsson HC, Sidor CA, Gado B. The giant crocodyliform  
1366 *Sarcosuchus* from the Cretaceous of Africa. *Science*. 2001;294:1516–19.
- 1367 54. Ross JP. Crocodiles: Status survey and conservation action plan 2nd ed. Gland  
1368 (Switzerland), Cambridge (UK): IUCN/SSC Crocodile Specialist Group; 1998.
- 1369 55. Grigg GC, Seebacher F, Franklin CE. *Crocodylian Biology and Evolution*.  
1370 Chipping Norton: Surrey Beatty & Sons; 2001.
- 1371 56. McShea DW. Mechanisms of large scale evolutionary trends. *Evolution*.  
1372 1994;48:1747–63.
- 1373 57. Felsenstein, J. Phylogenies and the comparative method. *Am Nat*. 1985;125:1–  
1374 15.
- 1375 58. Hansen TF. Stabilizing selection and the comparative analysis of adaptation.  
1376 *Evolution*; 1997;51:1341–51.
- 1377 59. Pennell MW, Harmon LJ. An integrative view of phylogenetic comparative  
1378 methods: connections to population genetics, community ecology, and paleobiology.  
1379 *Ann NY Acad Sci*. 2013;1289:90–105.
- 1380 60. MacFadden BJ. Fossil horses from “Eohippus” (*Hyracotherium*) to *Equus*:  
1381 scaling, Cope's law, and the evolution of body size. *Paleobiology*. 1986;12:355–69.
- 1382 61. Butler MA, King AA. Phylogenetic comparative analysis: a modeling approach  
1383 for adaptive evolution. *Am Nat*. 2004;164:683–95.

- 1384 62. Hunt G, Carrano MT. Models and methods for analyzing phenotypic evolution  
1385 in lineages and clades. In: Alroy J, Hunt G, editors. Quantitative methods in  
1386 Paleobiology. New Haven: The Paleontological Society Papers; 2010. p. 245–69.
- 1387 63. Hunt G. Measuring rates of phenotypic evolution and the inseparability of tempo  
1388 and mode. *Paleobiology*. 2012;38:351–73.
- 1389 64. Slater GJ. Phylogenetic evidence for a shift in the mode of mammalian body size  
1390 evolution at the Cretaceous–Palaeogene boundary. *Methods Ecol Evol*. 2013;4:734–44.
- 1391 65. Slater GJ. Iterative adaptive radiations of fossil canids show no evidence for  
1392 diversity-dependent trait evolution. *Proc Natl Acad Sci USA*. 2015;112:4897–902.
- 1393 66. Cooper N, Purvis A. Body size evolution in mammals: complexity in tempo and  
1394 mode. *Am Nat*. 2010;175:727–38.
- 1395 67. Sookias RB, Butler RJ, Benson RBJ. Rise of dinosaurs reveals major body-size  
1396 transitions are driven by passive processes of trait evolution. *Proc R Soc B-Biol Sci*.  
1397 2012;279:2180–7.
- 1398 68. Hunt G. Evolutionary patterns within fossil lineages: model-based assessment of  
1399 modes, rates, punctuations and process. In: Bambach RK, Kelley PH, editors. From  
1400 Evolution to geobiology: research questions driving Paleontology at the start of a new  
1401 century. New Haven: The Paleontological Society Papers; 2008. p. 117–31.
- 1402 69. Hunt G. Gradual or pulsed evolution: when should punctuational explanations be  
1403 preferred? *Paleobiology*. 2008;34:360–77.

- 1404 70. Hunt G, Hopkins MJ, Lidgard S. Simple versus complex models of trait  
1405 evolution and stasis as a response to environmental change. *Proc Natl Acad Sci USA*.  
1406 2015;112:4885–90.
- 1407 71. Mahler DL, Ingram T. Phylogenetic comparative methods for studying clade-  
1408 wide convergence. In: Garamszegi LZ, editor. *Modern phylogenetic comparative*  
1409 *methods and their application in evolutionary biology*. Berlin: Springer; 2014. p. 425–  
1410 50.
- 1411 72. Khabbazian M, Kriebel R, Rohe K, Ané C. Fast and accurate detection of  
1412 evolutionary shifts in Ornstein–Uhlenbeck models. *Methods Ecol Evol*. 2016;7:811–24.
- 1413 73. Simpson GG. *Tempo and mode in evolution*. New York: Columbia University  
1414 Press; 1944.
- 1415 74. Simpson GG. *Major features of evolution*. New York: Columbia University  
1416 Press; 1953.
- 1417 75. Hansen TF. Adaptive landscapes and macroevolutionary dynamics. In: Svensson  
1418 E, Calsbeek R, editors. *The adaptive landscape in evolutionary biology*. Oxford: Oxford  
1419 University Press; 2012. p. 205–26.
- 1420 76. Arnold SJ. Phenotypic evolution: the ongoing synthesis (American Society of  
1421 Naturalists Address). *Am Nat*. 2014;183:729–46.
- 1422 77. Arnold SJ, Pfrender ME, Jones AG. The adaptive landscape as a conceptual  
1423 bridge between micro-and macroevolution. *Genetica*. 2001;112: 9–32.

- 1424 78. Uyeda JC, Harmon LJ. A novel Bayesian method for inferring and interpreting  
1425 the dynamics of adaptive landscapes from phylogenetic comparative data. *Syst Biol.*  
1426 2014;63:902–18.
- 1427 79. Hansen TF, Martins EP. Translating between microevolutionary process and  
1428 macroevolutionary patterns: the correlation structure of interspecific data. *Evolution.*  
1429 1996;50:1404–17.
- 1430 80. Pagel M. Modelling the evolution of continuously varying characters on  
1431 phylogenetic trees. In: MacLeod N, Forey PL, editors. *Morphology, shape and*  
1432 *phylogeny*. London: Taylor & Francis; 2002. p. 269–86.
- 1433 81. Felsenstein J. Phylogenies and quantitative characters. *Annu Rev Ecol Syst.*  
1434 1988;19:445–71.
- 1435 82. Beaulieu JM, Jhvueng DC, Boettiger C, O’Meara BC. Modeling stabilizing  
1436 selection: expanding the Ornstein–Uhlenbeck model of adaptive evolution. *Evolution.*  
1437 2012;66:2369–83.
- 1438 83. Ingram T, Mahler DL. SURFACE: detecting convergent evolution from  
1439 comparative data by fitting Ornstein–Uhlenbeck models with stepwise Akaike  
1440 Information Criterion. *Methods Ecol Evol.* 2013;4:416–25.
- 1441 84. Akaike H. A new look at the statistical model identification. *IEEE Trans Autom*  
1442 *Control.* 1974;19:716–23.
- 1443 85. Mahler DL, Ingram T, Revell LJ, Losos JB. Exceptional convergence on the  
1444 macroevolutionary landscape in island lizard radiations. *Science.* 2013;341:292–5.

- 1445 86. Davis AM, Unmack PJ, Pusey BJ, Pearson RG, Morgan DL. Evidence for a  
1446 multi-peak adaptive landscape in the evolution of trophic morphology in terapontid  
1447 fishes. *Biol J Linnean Soc.* 2014;113:623–34.
- 1448 87. Brocklehurst N. Rates and modes of body size evolution in early carnivores and  
1449 herbivores: a case study from Captorhinidae. *PeerJ.* 2016;4: e1555.
- 1450 88. Young MT, Rabi M, Bell MA, Foffa D, Steel L, Sachs S, Peyer K. Big-headed  
1451 marine crocodyliforms and why we must be cautious when using extant species as body  
1452 length proxies for long-extinct relatives. *Palaeontol Electron.* 2016;19:1–14.
- 1453 89. Webb GJW, Messel H. Morphometric analysis of *Crocodylus porosus* from the  
1454 north coast of Arnhem Land, northern Australia. *Aust J Zool.* 1978;26:1–27.
- 1455 90. Hall PM, Portier KM. Cranial morphometry of New Guinea crocodiles  
1456 (*Crocodylus novaeguineae*): ontogenetic variation in relative growth of the skull and an  
1457 assessment of its utility as a predictor of the sex and size of individuals. *Herpetol*  
1458 *Monogr.* 1994;8:203–25.
- 1459 91. Hurlburt GR, Heckert AB, Farlow JO. Body mass estimates of phytosaurs  
1460 (Archosauria: Parasuchidae) from the Petrified Forest Formation (Chinle Group:  
1461 Revueltian) based on skull and limb bone measurements. *New Mex Mus Nat Hist Sci*  
1462 *Bull.* 2003;24:105–13.
- 1463 92. Platt SG, Rainwater TR, Thorbjarnarson JB, Finger AG, Anderson TA,  
1464 McMurry ST. Size estimation, morphometrics, sex ratio, sexual size dimorphism, and  
1465 biomass of Morelet's crocodile in northern Belize. *Caribb J Sci.* 2009;45:80–93.

- 1466 93. Platt SG, Rainwater TR, Thorbjarnarson JB, Martin D. Size estimation,  
1467 morphometrics, sex ratio, sexual size dimorphism, and biomass of *Crocodylus acutus* in  
1468 the coastal zone of Belize. *Salamandra*. 2011;47:179–92.
- 1469 94. Bustard HR, Singh LAK. Studies on the Indian Gharial *Gavialis gangeticus*  
1470 (Gmelin) (Reptilia, Crocodylia) – I: Estimation of body length from scute length. *Indian*  
1471 *For.* 1977;103:140–9.
- 1472 95. Farlow JO, Hurlburt GR, Elsey RM, Britton AR, Langston W. Femoral  
1473 dimensions and body size of Alligator mississippiensis: estimating the size of extinct  
1474 mesoeucrocodylians. *J Vertebr Paleontol.* 2005;25:354–69.
- 1475 96. Pol D, Leardi JM, Lecuona A, Krause M. Postcranial anatomy of *Sebecus*  
1476 *icaeorhinus* (Crocodyliformes, Sebecidae) from the Eocene of Patagonia. *J Vertebr*  
1477 *Paleontol.* 2012;32:328–54.
- 1478 97. Godoy PL, Bronzati M, Eltink E, Marsola JCA, Cidade GM, Langer MC,  
1479 Montefeltro FC. Postcranial anatomy of *Pissarrachampsia sera* (Crocodyliformes,  
1480 Baurusuchidae) from the Late Cretaceous of Brazil: insights on lifestyle and  
1481 phylogenetic significance. *PeerJ.* 2016;4:e2075.
- 1482 98. Clark JM. Patterns of evolution in Mesozoic Crocodyliformes. In: Fraser NC,  
1483 Sues HD, editors. *In the shadow of the dinosaurs. early Mesozoic tetrapods.* Cambridge:  
1484 Cambridge University Press; 1994. p. 84–97.
- 1485 99. Pol D, Gasparini Z. Skull anatomy of *Dakosaurus andiniensis* (Thalattosuchia:  
1486 Crocodylomorpha) and the phylogenetic position of Thalattosuchia. *J Syst Palaeontol.*  
1487 2009;7:163–97.

- 1488 100. Wilberg EW. What's in an outgroup? The impact of outgroup choice on the  
1489 phylogenetic position of Thalattosuchia (Crocodylomorpha) and the origin of  
1490 Crocodyliformes. *Syst Biol.* 2015;64:621–37.
- 1491 101. Herrera Y, Fernandez MS, Lamas SG, Campos L, Talevi M, Gasparini Z.  
1492 Morphology of the sacral region and reproductive strategies of Metriorhynchidae: a  
1493 counter-inductive approach. *Earth Env Sci T R So Edinb.* 2017;106:247–55.
- 1494 102. Jouve S, Iarochene M, Bouya B, Amaghaz M. A new species of *Dyrosaurus*  
1495 (Crocodylomorpha, Dyrosauridae) from the early Eocene of Morocco: phylogenetic  
1496 implications. *Zool J Linn Soc.* 2006;148:603–56.
- 1497 103. Young MT, Andrade MB. What is *Geosaurus*? Redescription of *Geosaurus*  
1498 *giganteus* (Thalattosuchia: Metriorhynchidae) from the Upper Jurassic of Bayern,  
1499 Germany. *Zool J Linn Soc.* 2009;157:551–85.
- 1500 104. Montefeltro FC, Larsson HC, França MA, Langer MC. A new neosuchian with  
1501 Asian affinities from the Jurassic of northeastern Brazil. *Naturwissenschaften.*  
1502 2013;100:835–41.
- 1503 105. Turner AH. A review of *Shamosuchus* and *Paralligator* (Crocodyliformes,  
1504 Neosuchia) from the Cretaceous of Asia. *PLoS One.* 2015;10:e0118116.
- 1505 106. Larsson HC, Sues HD. Cranial osteology and phylogenetic relationships of  
1506 *Hamadasuchus rebouli* (Crocodyliformes: Mesoeucrocodylia) from the Cretaceous of  
1507 Morocco. *Zool J Linn Soc.* 2007;149:533–67.

- 1508 107. Bapst DW. Preparing paleontological datasets for phylogenetic comparative  
1509 methods. In: Garamszegi LZ, editor. Modern phylogenetic comparative methods and  
1510 their application in evolutionary biology. Berlin: Springer; 2014. p. 515–44.
- 1511 108. Bapst DW. A stochastic rate-calibrated method for time-scaling phylogenies  
1512 of fossil taxa. *Methods Ecol Evol.* 2013;4:724–33.
- 1513 109. Bapst DW. Assessing the effect of time-scaling methods on phylogeny-based  
1514 analyses in the fossil record. *Paleobiology.* 2014;40:331–51.
- 1515 110. Stadler T. Sampling-through-time in birth–death trees. *J Theor Biol.*  
1516 2010;267:396–404.
- 1517 111. Ronquist F, Klopfstein S, Vilhelmsen L, Schulmeister S, Murray DL, Rasnitsyn  
1518 AP. A total-evidence approach to dating with fossils, applied to the early radiation of  
1519 the Hymenoptera. *Syst Biol.* 2012;61:973–99.
- 1520 112. Zhang C, Stadler T, Klopfstein S, Heath TA, Ronquist F. Total-evidence dating  
1521 under the fossilized birth–death process. *Syst Biol.* 2015;65:228–49.
- 1522 113. Matzke NJ, Wright A. Inferring node dates from tip dates in fossil Canidae: the  
1523 importance of tree priors. *Biol Lett.* 2016;12:20160328.
- 1524 114. Wright DF. Bayesian estimation of fossil phylogenies and the evolution of early  
1525 to middle Paleozoic crinoids (Echinodermata). *J Paleontol.* 2017;91:799–814.
- 1526 115. Ronquist F, Teslenko M, Van Der Mark P, Ayres DL, Darling A, Höhna S,  
1527 Larget B, Liu L, Suchard MA, Huelsenbeck JP. MrBayes 3.2: efficient Bayesian  
1528 phylogenetic inference and model choice across a large model space. *Syst Biol.*  
1529 2012;61:539–42.



- 1530 116. Bapst DW. paleotree: an R package for paleontological and phylogenetic  
1531 analyses of evolution. *Methods Ecol Evol.* 2012;3:803–07.
- 1532 117. Irmis RB, Nesbitt SJ, Sues HD. Early Crocodylomorpha. *Geol Soc Spec Publ.*  
1533 2013;379:275–302.
- 1534 118. Ezcurra MD, Butler RJ. The rise of the ruling reptiles and ecosystem recovery  
1535 from the Permo-Triassic mass extinction *Proc R Soc B-Biol Sci.* 2018;285:20180361.
- 1536 119. Bapst DW, Wright AM, Matzke NJ, Lloyd GT. Topology, divergence dates, and  
1537 macroevolutionary inferences vary between different tip-dating approaches applied to  
1538 fossil theropods (Dinosauria). *Biol Lett.* 2016;12:20160237.
- 1539 120. Lloyd GT, Bapst DW, Friedman M, Davis KE. Probabilistic divergence time  
1540 estimation without branch lengths: dating the origins of dinosaurs, avian flight and  
1541 crown birds. *Biol Lett.* 2016;12:20160609.
- 1542 121. R Core Team. R: a language and environment for statistical computing. Vienna:  
1543 R Foundation for Statistical Computing; 2018. <https://www.R-project.org/>.
- 1544 122. Harmon LJ, Weir JT, Brock CD, Glor RE, Challenger W. GEIGER:  
1545 investigating evolutionary radiations. *Bioinformatics.* 2008;24:129–31.
- 1546 123. Sugiura N. Further analysts of the data by Akaike's information criterion and the  
1547 finite corrections. *Commun Stat–Theor M.* 1978;7:13–26.
- 1548 124. Burnham KP, Anderson DR. Model selection and multimodel inference: a  
1549 practical information–theoretic approach. 2nd ed. New York: Springer; 2002.

- 1550 125. Blomberg SP, Garland T, Ives AR. Testing for phylogenetic signal in  
1551 comparative data: behavioral traits are more labile. *Evolution*. 2003;57:717–45.
- 1552 126. Harmon LJ, Losos JB, Davies TJ, Gillespie RG, Gittleman JL, Bryan Jennings  
1553 W, Kozak KH, McPeck MA, Moreno-Roark F, Near TJ, et al. Early bursts of body size  
1554 and shape evolution are rare in comparative data. *Evolution*. 2010;64:2385–96.
- 1555 127. Ho LST, Ané C. Intrinsic inference difficulties for trait evolution with  
1556 Ornstein–Uhlenbeck models. *Methods Ecol Evol*. 2014;5:1133–46.
- 1557 128. Cooper N, Thomas GH, Venditti C, Meade A, Freckleton RP. A cautionary note  
1558 on the use of Ornstein–Uhlenbeck models in macroevolutionary studies. *Biol J Linn Soc*.  
1559 2016;118:64–77.
- 1560 129. Clavel J, Escarguel G, Merceron G. mvMORPH: an R package for fitting  
1561 multivariate evolutionary models to morphometric data. *Methods Ecol Evol*.  
1562 2015;6:1311–9.
- 1563 130. Beaulieu JM, O’Meara BC. OUwie: Analysis of Evolutionary Rates in an OU  
1564 Framework. R package version 1.50. 2016. [https://CRAN.R-](https://CRAN.R-project.org/package=OUwie)  
1565 [project.org/package=OUwie](https://CRAN.R-project.org/package=OUwie).
- 1566 131. Zachos JC, Dickens GR, Zeebe RE. An early Cenozoic perspective on  
1567 greenhouse warming and carbon-cycle dynamics. *Nature*. 2008;451:279–83.
- 1568 132. Prokoph A, Shields GA, Veize, J. Compilation and time-series analysis of a  
1569 marine carbonate  $\delta^{18}\text{O}$ ,  $\delta^{13}\text{C}$ ,  $^{87}\text{Sr}/^{86}\text{Sr}$  and  $\delta^{34}\text{S}$  database through Earth history. *Earth–*  
1570 *Sci Rev*. 2008;87:113–33.

1571 133. Hunt G, Cronin TM, Roy K. Species–energy relationship in the deep sea: a test  
1572 using the Quaternary fossil record. *Ecol Lett.* 2005;8:739–47.

1573 134. Marx FG, Uhen MD. Climate, critters, and cetaceans: Cenozoic drivers of the  
1574 evolution of modern whales. *Science.* 2010;327:993–6.

1575 135. Benson RBJ, Butler RJ. Uncovering the diversification history of marine  
1576 tetrapods: ecology influences the effect of geological sampling biases. *Geol Soc Spec*  
1577 *Publ.* 2011;358:191–208.

1578 136. Wilberg EW, Turner AH, Brochu CA. Evolutionary structure and timing of  
1579 major habitat shifts in Crocodylomorpha. *Sci Rep.* 2019;9:514.

1580 137. Martins EP, Hansen TF. Phylogenies and the comparative method: a general  
1581 approach to incorporating phylogenetic information into the analysis of interspecific  
1582 data. *Am Nat.* 1997;149:646–67.

1583 138. Pagel M. Inferring the historical patterns of biological evolution. *Nature.*  
1584 1999;401:877–84.

1585 139. Orme CDL, Freckleton R, Thomas G, Petzoldt T, Fritz S, Isaac N, Pearse W.  
1586 CAPER: comparative analyses of phylogenetics and evolution in R. R package version  
1587 1.0.1. 2018. <https://CRAN.R-project.org/package=caper>.

1588 140. Garland T, Dickerman AW, Janis CM, Jones JA. Phylogenetic analysis of  
1589 covariance by computer simulation. *Syst Biol.* 1993;42:265–92.

1590 141. Pinheiro J, Bates D, DebRoy S, Sarkar D, R Core Team. nlme: linear and  
1591 nonlinear mixed effects models. R package version 3.1–131. 2017. [https://CRAN.R-](https://CRAN.R-project.org/package=nlme)  
1592 [project.org/package=nlme](https://CRAN.R-project.org/package=nlme).

- 1593 142. Revell LJ. phytools: an R package for phylogenetic comparative biology (and  
1594 other things). *Methods Ecol Evol.* 2012;3:217–23.
- 1595 143. Foote M. Discordance and concordance between morphological and taxonomic  
1596 diversity. *Paleobiology.* 1993;19:185–204.
- 1597 144. Foote M. The evolution of morphological diversity. *Annu Rev Ecol Syst.*  
1598 1997;28:129–52.
- 1599 145. Wills MA. Morphological disparity: a primer. In: Adrain JM, Edgecombe GD,  
1600 Lieberman BS, editors. *Fossils, phylogeny, and form.* Boston: Springer; 2001. p. 55–  
1601 144.
- 1602 146. Hopkins MJ, Gerber S. Morphological disparity. In: Nuño de la Rosa L, Müller  
1603 GB, editors. *Evolutionary Developmental Biology.* Springer International Publishing;  
1604 2017. p. 1–12.
- 1605 147. Burnham KP, Anderson DR, Huyvaert KP. AIC model selection and multimodel  
1606 inference in behavioral ecology: some background, observations, and comparisons.  
1607 *Behav Ecol Sociobiol.* 2011;65:23–35.
- 1608 148. Marinho TS, Carvalho IS. An armadillo-like sphagesaurid crocodyliform from  
1609 the Late Cretaceous of Brazil. *J S Am Earth Sci.* 2009;27:36–41.
- 1610 149. Young MT, Tennant JP, Brusatte SL, Challands TJ, Fraser NC, Clark ND, Ross,  
1611 DA. The first definitive Middle Jurassic atoposaurid (Crocodylomorpha, Neosuchia),  
1612 and a discussion on the genus *Theriosuchus*. *Zool J Linn Soc.* 2016;176:443–62.
- 1613 150. Brochu CA. A new alligatorid from the lower Eocene Green River Formation of  
1614 Wyoming and the origin of caimans. *J Vertebr Paleontol.* 2010;30:1109–26.

- 1615 151. Van Valen L. Adaptive zones and the orders of mammals. *Evolution*.  
1616 1971;25:420–8.
- 1617 152. Landis MJ, Schraiber JG. Pulsed evolution shaped modern vertebrate body sizes.  
1618 *Proc Natl Acad Sci USA*. 2017;114:13224–9.
- 1619 153. Slater GJ, Pennell MW. Robust regression and posterior predictive simulation  
1620 increase power to detect early bursts of trait evolution. *Syst Biol*. 2013;63:293–308.
- 1621 154. Downhower JF, Blumer LS. Calculating just how small a whale can be. *Nature*.  
1622 1988;335:675.
- 1623 155. Williams TM. The evolution of cost efficient swimming in marine mammals:  
1624 limits to energetic optimization. *Philos Trans R Soc Lond B-Biol Sci*. 1999;354:193–  
1625 201.
- 1626 156. Vermeij GJ. Gigantism and its implications for the history of life. *PLoS One*.  
1627 2016;11:e0146092.
- 1628 157. Ahlborn BK, Blake RW. Lower size limit of aquatic mammals. *Am J Phys*.  
1629 1999;67:920–2.
- 1630 158. Smith EN. Heating and cooling rates of the American alligator, *Alligator*  
1631 *mississippiensis*. *Physiol Zool*. 1976;49:37–48.
- 1632 159. Zanno LE, Drymala S, Nesbitt SJ, Schneider VP. Early crocodylomorph  
1633 increases top tier predator diversity during rise of dinosaurs. *Sci Rep*. 2015;5:9276.
- 1634 160. Sookias RB, Benson RBJ, Butler RJ. Biology, not environment, drives major  
1635 patterns in maximum tetrapod body size through time. *Biol Lett*. 2012;8:674–7.

- 1636 161. Huttenlocker AK. Body size reductions in nonmammalian eutheriodont  
1637 therapsids (Synapsida) during the end-Permian mass extinction. PLoS One.  
1638 2014;9:e87553.
- 1639 162. Linnert C, Robinson SA, Lees JA, Bown PR, Pérez-Rodríguez I, Petrizzo MR,  
1640 Falzoni F, Littler K, Arz JA, Russell EE. Evidence for global cooling in the Late  
1641 Cretaceous. Nat Commun. 2014;5:4194.
- 1642 163. Alroy J. A multispecies overkill simulation of the end-Pleistocene megafaunal  
1643 mass extinction. Science. 2001;292:1893–6.
- 1644 164. Johnson CN. Determinants of loss of mammal species during the Late  
1645 Quaternary ‘megafauna’ extinctions: life history and ecology, but not body size. Proc R  
1646 Soc B-Biol Sci. 2002;269:22213–7.
- 1647 165. Fisher DO, Owens IP. The comparative method in conservation biology. Trends  
1648 Ecol Evol. 2004;19:391–8.
- 1649 166. Cardillo M, Mace GM, Jones KE, Bielby J, Bininda-Emonds OR, Sechrest W,  
1650 Orme CDL, Purvis A. Multiple causes of high extinction risk in large mammal species.  
1651 Science. 2005;309:1239–41.
- 1652 167. Clauset A, Erwin DH. The evolution and distribution of species body size.  
1653 Science. 2008;321:399–401.
- 1654 168. Purvis A, Gittleman JL, Cowlshaw G, Mace GM. Predicting extinction risk in  
1655 declining species. Proc R Soc B-Biol Sci. 2000;267:1947–52.
- 1656 169. Van Valkenburgh B, Wang X, Damuth J. Cope's rule, hypercarnivory, and  
1657 extinction in North American canids. Science. 2004;306:101–4.

- 1658 170. Tennant JP, Mannion PD, Upchurch P. Environmental drivers of crocodyliform  
1659 extinction across the Jurassic/Cretaceous transition. *Proc R Soc B-Biol Sci.*  
1660 2016;283:20152840.
- 1661 171. Tennant JP, Mannion PD, Upchurch P. Sea level regulated tetrapod diversity  
1662 dynamics through the Jurassic/Cretaceous interval. *Nat Commun.* 2016;7:12737.
- 1663 172. Tennant JP, Mannion PD, Upchurch P, Sutton MD, Price GD. Biotic and  
1664 environmental dynamics through the Late Jurassic–Early Cretaceous transition:  
1665 evidence for protracted faunal and ecological turnover. *Biol Rev.* 2017;92:776–814.
- 1666 173. Fanti F, Miyashita T, Cantelli L, Mnasri F, Dridi J, Contessi M, Cau A. The  
1667 largest thalattosuchian (Crocodylomorpha) supports teleosaurid survival across the  
1668 Jurassic-Cretaceous boundary. *Cretaceous Res.* 2016;61:263–74.
- 1669 174. Benson RBJ, Mannion PD, Butler RJ, Upchurch P, Goswami A, Evans SE.  
1670 Cretaceous tetrapod fossil record sampling and faunal turnover: implications for  
1671 biogeography and the rise of modern clades. *Palaeogeogr Palaeocl.* 2013;372:88–107.
- 1672 175. Carvalho IS, Gasparini ZB, Salgado L, Vasconcellos FM, Marinho TS. Climate's  
1673 role in the distribution of the Cretaceous terrestrial Crocodyliformes throughout  
1674 Gondwana. *Palaeogeogr Palaeocl.* 2010;297:252–62.
- 1675 176. Pol D, Leardi JM. Diversity patterns of Notosuchia (Crocodyliformes,  
1676 Mesoeucrocodylia) during the Cretaceous of Gondwana. In: Fernández M, Herrera Y,  
1677 editors. *Reptiles Extintos–Volumen en Homenaje a Zulma Gasparini.* Buenos Aires:  
1678 Asociación Paleontológica Argentina; 2015. p. 172–86

- 1679 177. Brochu CA. Phylogenetic approaches toward crocodylian history. *Annu Rev*  
1680 *Earth Pl Sc.* 2003;31:357–97.
- 1681 178. Ósi A. The evolution of jaw mechanism and dental function in heterodont  
1682 crocodyliforms. *Hist Biol.* 2014;26:279–414.
- 1683 179. Pol D, Nascimento PM, Carvalho AB, Riccomini C, Pires-Domingues RA,  
1684 Zaher H. A new notosuchian from the Late Cretaceous of Brazil and the phylogeny of  
1685 advanced notosuchians. *PLoS One.* 2014;9:e93105.
- 1686 180. Russell AP, Wu X. The Crocodylomorpha at and between geological  
1687 boundaries. *Zoology.* 1997;100:164–82.
- 1688 181. Jouve S, Bardet N, Jalil NE, Suberbiola XP, Bouya, Amaghaz, M. The oldest  
1689 African crocodylian: phylogeny, paleobiogeography, and differential survivorship of  
1690 marine reptiles through the Cretaceous-Tertiary boundary. *J Vertebr Paleontol.*  
1691 2008;28:409–21.
- 1692 182. Wilson GP. Mammals across the K/Pg boundary in northeastern Montana, USA:  
1693 dental morphology and body-size patterns reveal extinction selectivity and immigrant-  
1694 fueled ecospace filling. *Paleobiology.* 2013;39:429–69.
- 1695 183. Longrich NR, Bhullar BAS, Gauthier JA. Mass extinction of lizards and snakes  
1696 at the Cretaceous–Paleogene boundary. *Proc Natl Acad Sci USA.* 2012;109:21396–401.
- 1697
- 1698
- 1699
- 1700
- 1701



1702 **Figure legends**

1703

1704 **Fig. 1**

1705 Simplified cladogram showing the phylogenetic relationships among crocodylomorphs  
1706 and the alternative positions of Thalattosuchia (dashed red lines), following hypotheses  
1707 proposed by [34, 35, 109, 113, 115]. Silhouettes are from phylopic.org.

1708

1709 **Fig. 2**

1710 **(a and b)** Boxplots showing AICc scores of the evolutionary models fitted to  
1711 crocodylomorph phylogeny and body size data (using 20 trees time-calibrated with the  
1712 FBD method). Results shown for two cranial measurements datasets: ODCL **(a)** and  
1713 DCL **(b)**. For the trend-like models, only the AICc of the best model (“best trend”) is  
1714 shown. See Additional files 1 and 3 for further results. **(c-e)** Comparative results of  
1715 evolutionary models fitted to simulated data (under Brownian Motion) and our  
1716 empirical body size data (using the ODCL dataset). Data was simulated for 20  
1717 crocodylomorph time-scaled trees, and the same trees were used for fitting the  
1718 evolutionary models. **c**  $\Delta$ -AICc is the difference between AICc scores received by BM  
1719 and SURFACE models. **d** Number of regime shifts detected by the SURFACE  
1720 algorithm. **e** Values of  $\alpha$  estimated by the SURFACE algorithm. Results shown for  
1721 simulated and empirical data.

1722

1723 **Fig. 3**

1724 SURFACE model fit (using pBIC searches in the backward-phase) of tree number 2  
1725 among crocodylomorph topologies with Thalattosuchia placed within Neosuchia, using  
1726 the ODCL dataset and time-calibrated with the FBD method. Attraction to unrealized

1727 low or high trait optima are highlighted in blue and red, respectively. Model fits of trees  
1728 sharing the same position of Thalattosuchia show very similar regime configurations,  
1729 regardless of the dataset used (ODCL or DCL) and the time-calibration method (see  
1730 Additional file 4 for all SURFACE plots).

1731

1732 **Fig. 4**

1733 (a) SURFACE model fit (using pBIC searches in the backward-phase) of tree number  
1734 18 among crocodylomorph topologies with Thalattosuchia placed within Neosuchia,  
1735 using the ODCL dataset and time-calibrated with the FBD method. Attraction to  
1736 unrealized low or high trait optima are highlighted in blue and red, respectively. (b)  
1737 Simplified version of a, with independent multi-taxon regimes collapsed to single  
1738 branches.

1739

1740 **Fig. 5**

1741 SURFACE model fits of trees time-calibrated with the FBD method, using the ODCL  
1742 dataset. (a) Model fit of tree number 17 with Thalattosuchia as the sister group of  
1743 Crocodyliformes. Some model fits of trees sharing this same position of Thalattosuchia  
1744 show simpler model configurations, with significantly fewer regimes (see text for  
1745 details and Additional file 4 for all SURFACE plots). (b) Model fit of tree number 18  
1746 with Thalattosuchia as the sister group of Mesoeucrocodylia. (c and d) Simplified  
1747 versions of a and b, respectively, with independent multi-taxon regimes collapsed to  
1748 single branches.

1749

1750

1751

1752 **Fig. 6**

1753 AICc scores of all evolutionary models fitted to the phylogenies and body size data of  
1754 Crocodylia (top) and Notosuchia (bottom). For the trend-like models, only the AICc of  
1755 the best model (“best trend”) is shown.

1756

1757 **Fig. 7**

1758 Crocodylomorph body size through time, with colours representing different mono- or  
1759 paraphyletic (i.e., Crocodylomorph = non-mesoeucrocodylian crocodylomorphs,  
1760 excluding Thalattosuchia; Neosuchia = non-crocodylian neosuchians) crocodylomorph  
1761 groups. Body size represented by  $\log_{10}$  ODCL (orbito-cranial dorsal length) in  
1762 millimetres. (a) Phenogram with body size incorporated into crocodylomorph  
1763 phylogeny. (b) Palaeolatitudinal distribution of extinct crocodylomorphs through time,  
1764 incorporating body size information (i.e., different-sized circles represent variation in  
1765 body size).

1766

1767 **Fig. 8**

1768 (a) Crocodylomorph body size and palaeotemperature through time. Mean  $\log_{10}$  ODCL  
1769 represented by dashed black line, shaded polygon shows maximum and minimum  
1770 values for each time bin. Continuous light green displays mean  $\log_{10}$  ODCL values only  
1771 for Crocodylia. Palaeotemperature ( $\delta^{18}\text{O}$ ) illustrated by red line (data from [132]). (b)  
1772 Body size disparity through time. Disparity is represented by the standard deviation of  
1773  $\log_{10}$  ODCL values for each time bin (only time bins with more than 3 taxa were used  
1774 for calculating disparity). Error bars are accelerated bias-corrected percentile limits  
1775 (BCa) of disparity from 1,000 bootstrapping replicates. Asterisks mark the events of  
1776 largest interval-to-interval changes in disparity.

1777

1778 **Fig. 9**

1779 Summary of our SURFACE results combined with the crocodylomorph diversification  
1780 shifts found by Bronzati et al. [35]. Nodes with diversification shifts are indicated by  
1781 arrows, the colours of which represent distinct trait optima values (total body length in  
1782 centimetres, after applying formula from [91]), of different body size regimes. Black  
1783 arrows indicate nodes for which diversification shifts were identified, but no body size  
1784 regime shift was found by any of our SURFACE model fits.

1785

1786 **Fig. 10**

1787 (a) Body size frequency distributions of different crocodylomorph groups (mono- or  
1788 paraphyletic), constructed using the full set of 240 specimens in the ODCL dataset.  
1789 Underlying unfilled bars represent values for all crocodylomorphs. Filled bars represent  
1790 values for Crocodylia, Notosuchia, Thalattosuchia, non-mesoeucrocodylian  
1791 crocodylomorphs (excluding thalattosuchians), Tethysuchia and non-crocodylian  
1792 neosuchians (excluding tethysuchians and thalattosuchians). (b) Body size distributions  
1793 of different crocodylomorph lifestyles, shown with box-and-whisker plots (on the left)  
1794 and a mosaic plot (on the right). The 195 species from the ODCL dataset were  
1795 subdivided into terrestrial, semi-aquatic/freshwater and aquatic/marine categories (N =  
1796 45, 100 and 50, respectively) based on the literature. Body size is represented by  $\log_{10}$   
1797 cranial length (ODCL, orbito-cranial length, in millimetres).

1798

1799 **Fig. 11**

1800 Distribution of regime shifts represented by the difference between descendant and  
1801 ancestral regimes trait optima values ( $\theta$ ) plotted against the  $\theta$  of the ancestral regime.

1802 Large red circles represent shifts that led to clades containing multiple taxa, while  
1803 smaller pink circles represent “singleton” regimes, containing only single taxa. Vertical  
1804 dashed line indicates the ancestral regime for all crocodylomorphs ( $Z_0$ ), while horizontal  
1805 dashed line can be used as a reference to identify regime shifts giving rise to larger  
1806 (circles above the line) or smaller-bodied (circles below the line) descendants. Circles at  
1807 the exact same position (i.e., shifts with the same  $\theta$  values for both ancestral and  
1808 descendant regimes) were slightly displaced in relation to one another to enable  
1809 visualization. This plot was constructed using the  $\theta$  values from trees with different  
1810 positions of Thalattosuchia: **(a)** Tree number 2, with Thalattosuchia within Neosuchia;  
1811 **(b)** Tree number 17, with Thalattosuchia as the sister group of Crocodyliformes; **(c)**  
1812 Tree number 18, with Thalattosuchia as the sister group of Mesoeucrocodylia.  $\theta$  values  
1813 in  $\log_{10}$  mm, relative to the cranial measurement ODCL (orbito-cranial dorsal length).

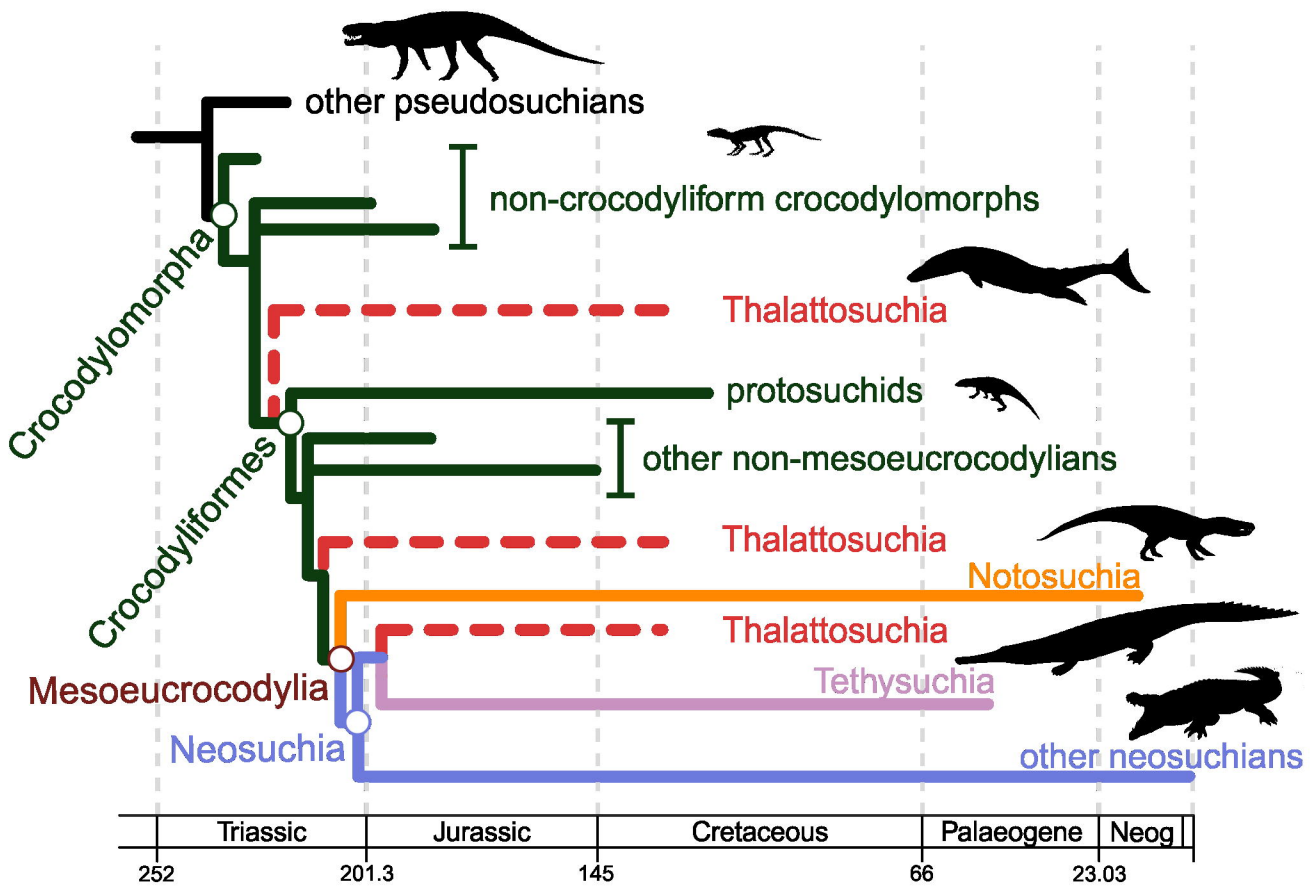

**a**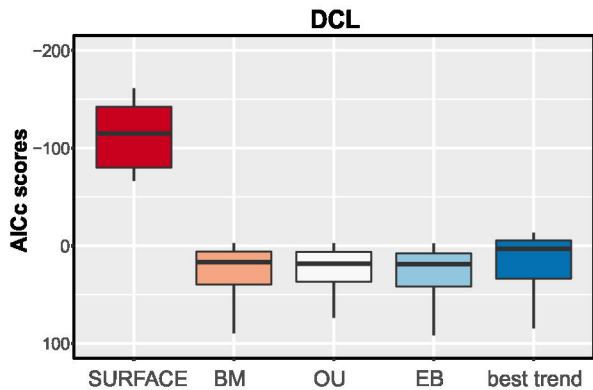**b**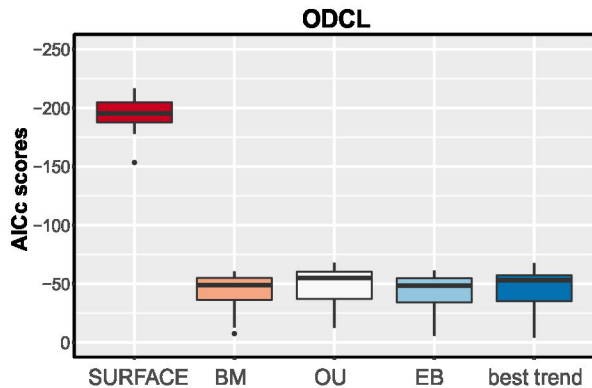**c**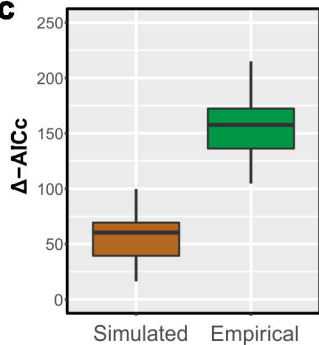**d**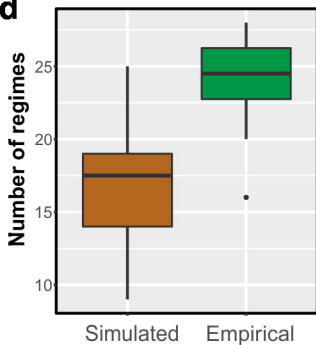**e**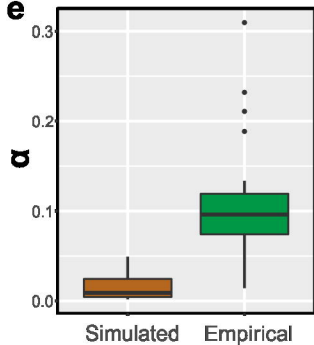

Tree 2:  
 pBIC = -199.932  
 alpha = 0.189  
 sigma sq. = 0.005

Trait optima / centimetres:  
 theta(b) = 41  
 theta(a) = 75  
 theta(e) = 140  
 theta(n) = 230  
 theta(h) = 340  
 theta(g) = 530  
 theta(c) = 1000

theta / centimetres

|      |
|------|
| 1020 |
| 530  |
| 340  |
| 230  |
| 140  |
| 70   |
| 40   |

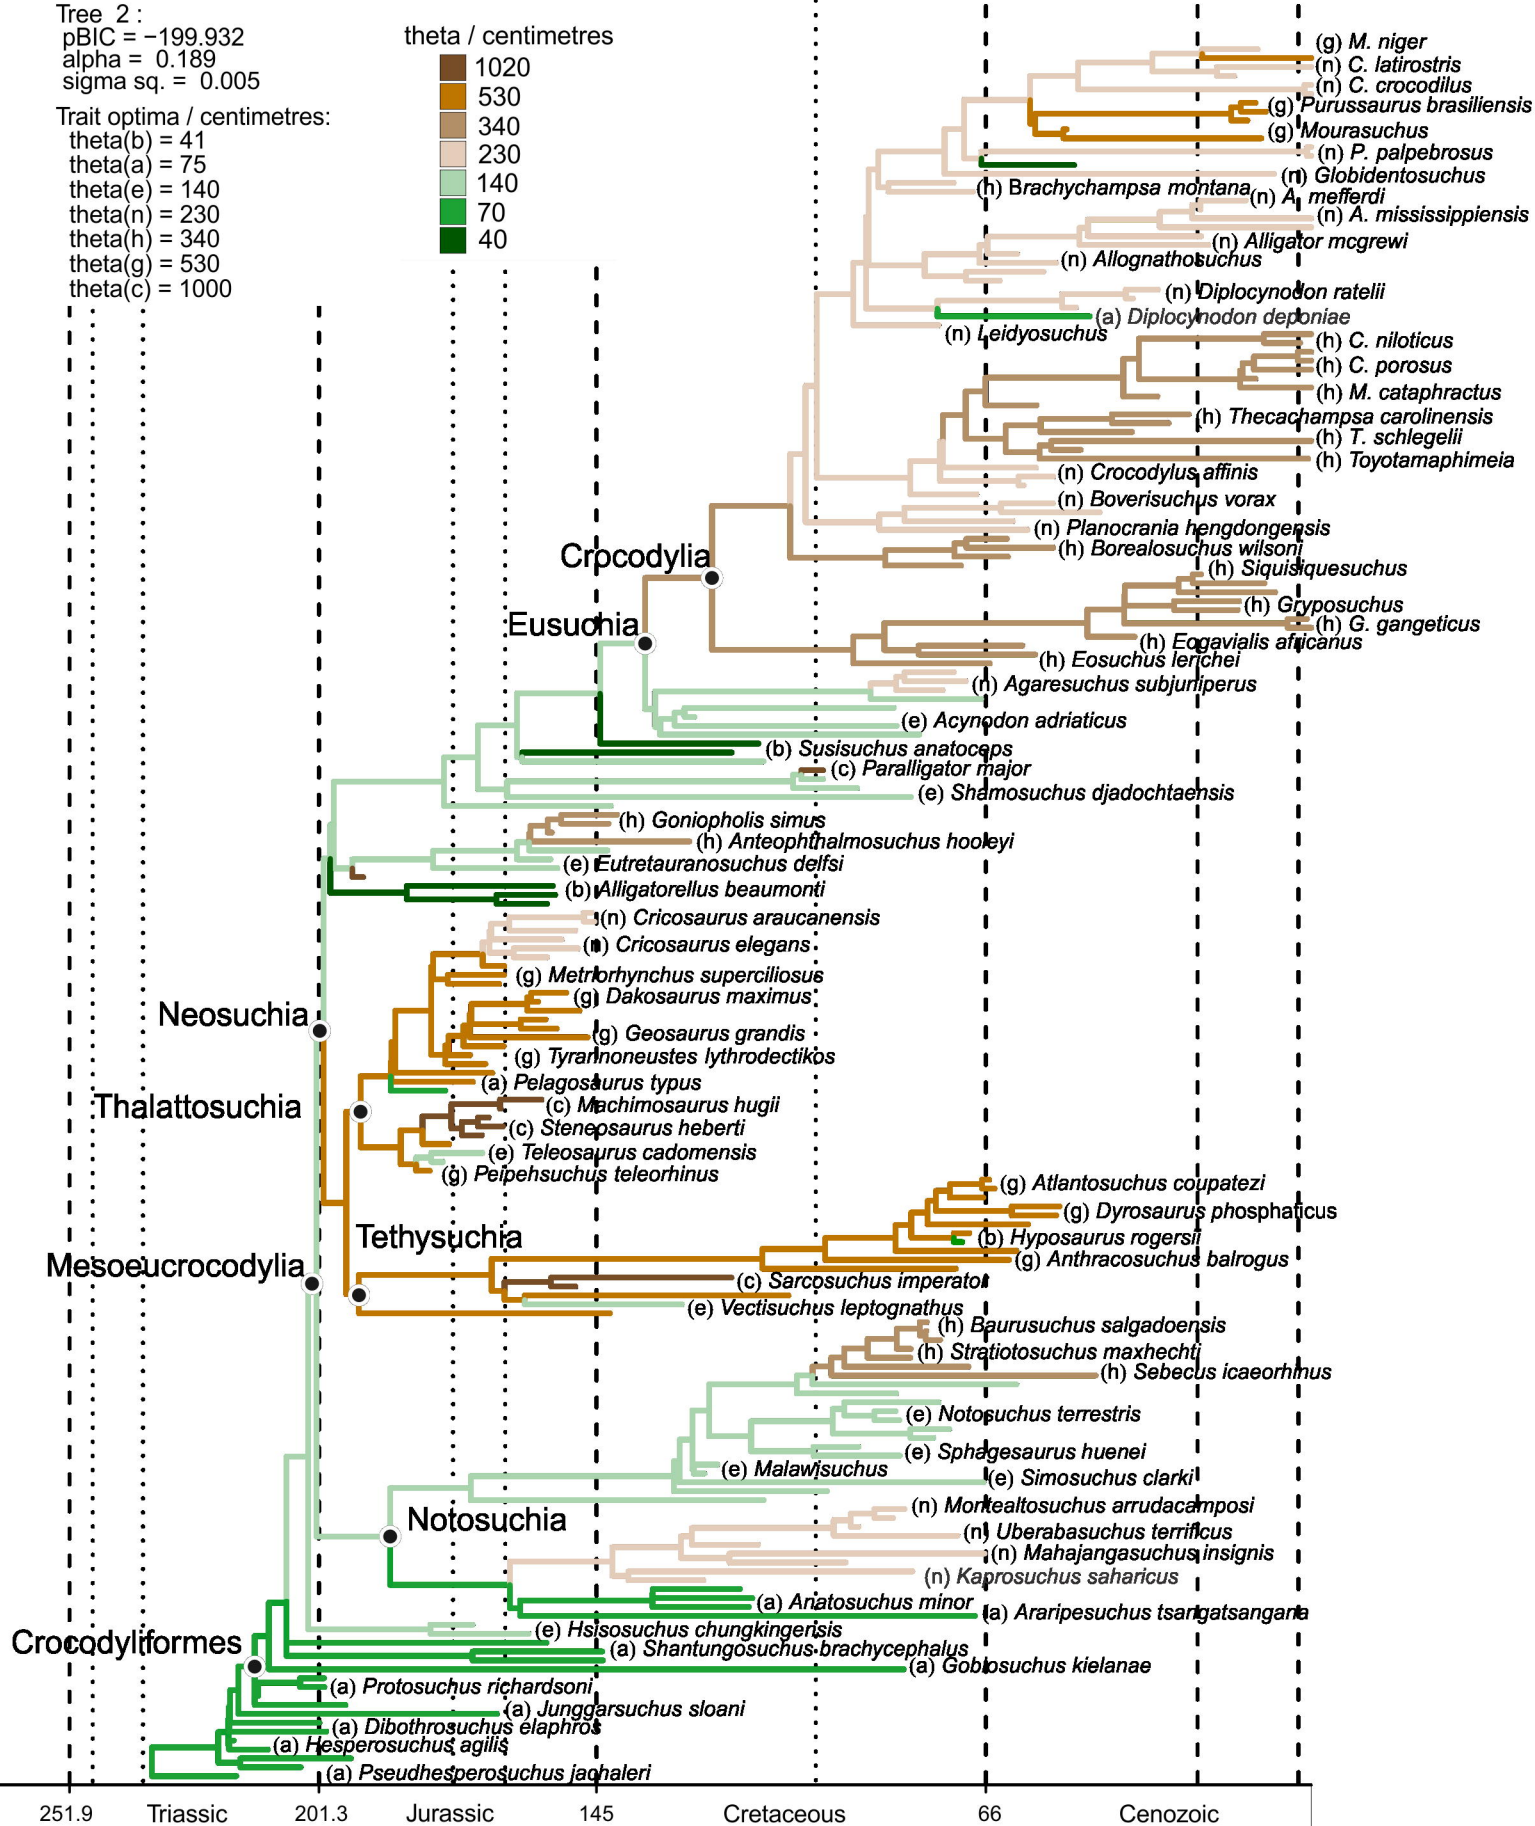



**a**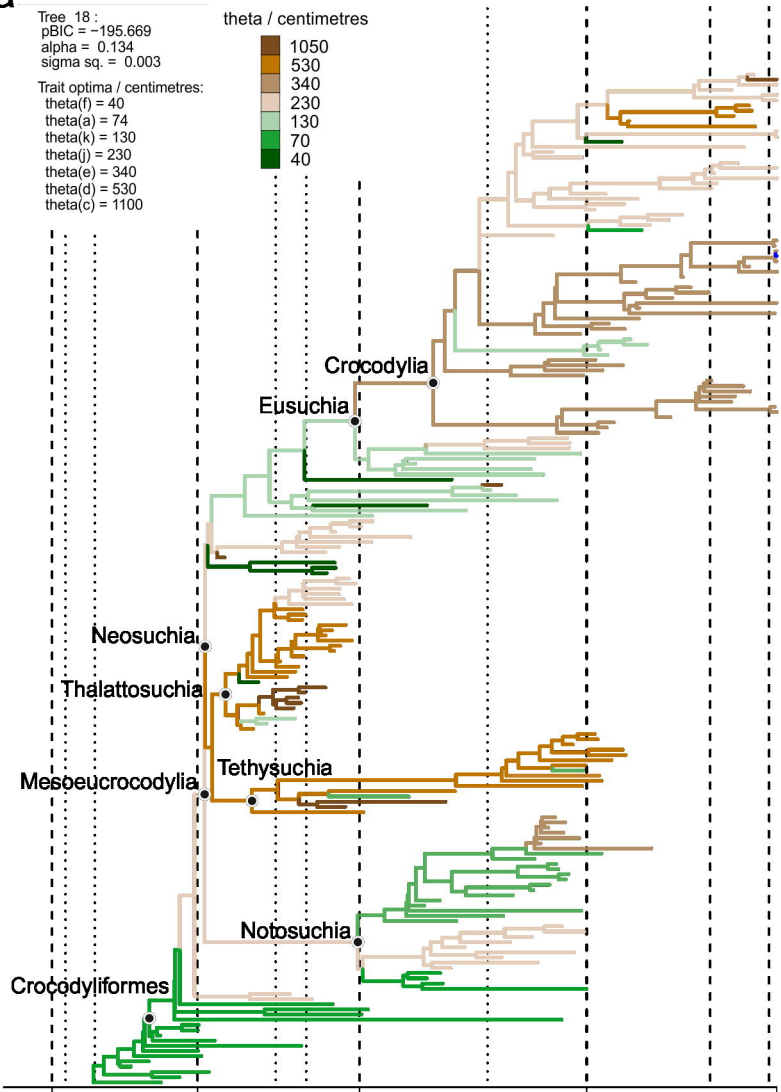**b**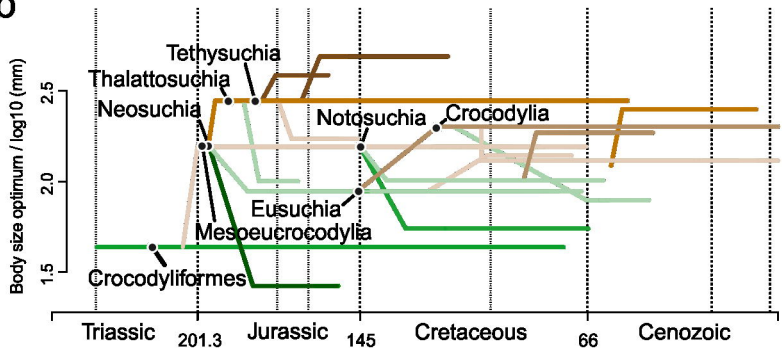

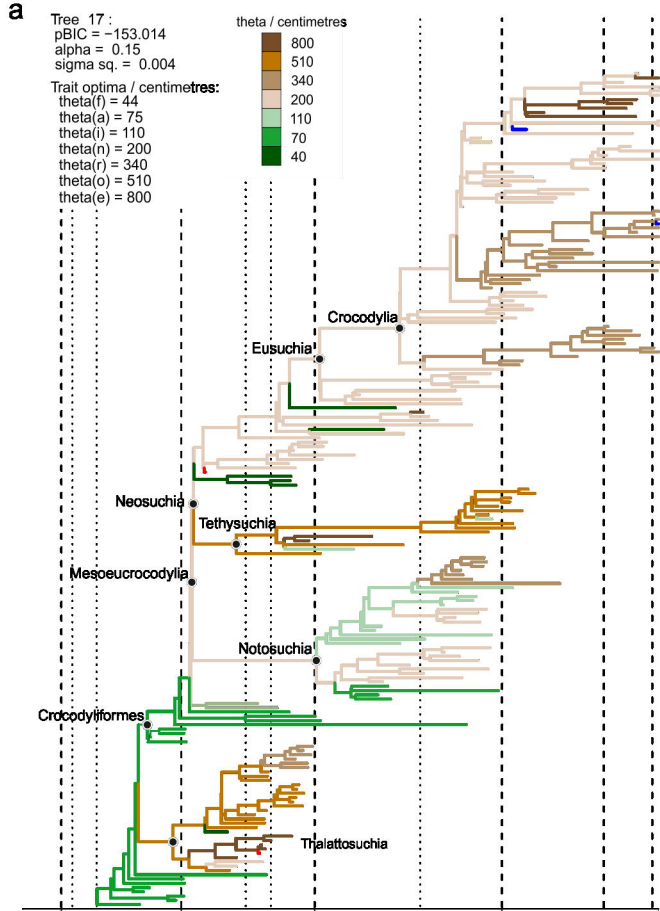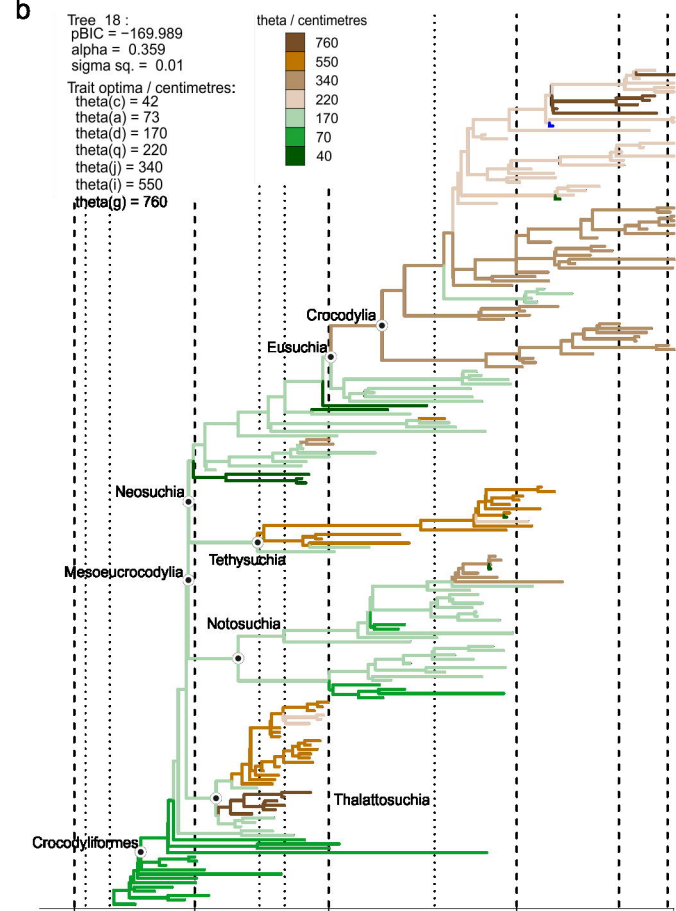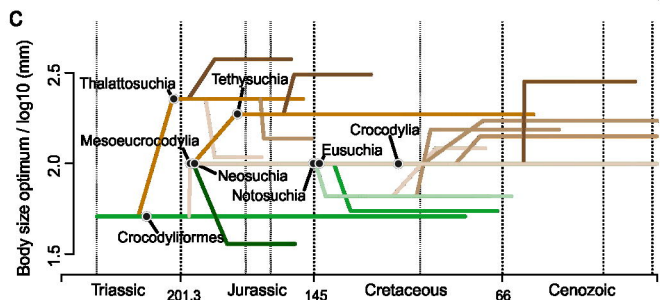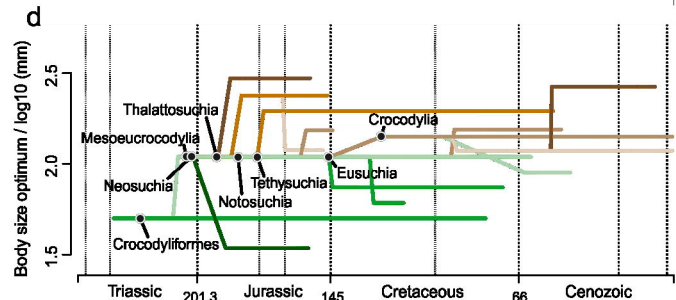

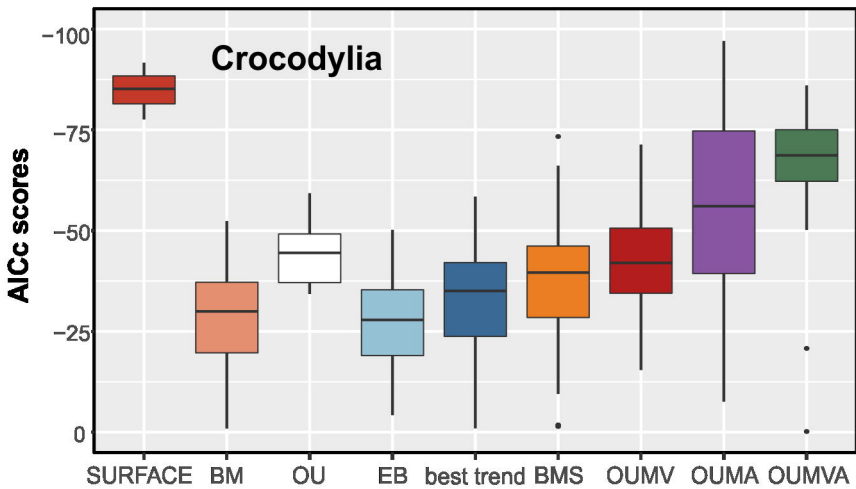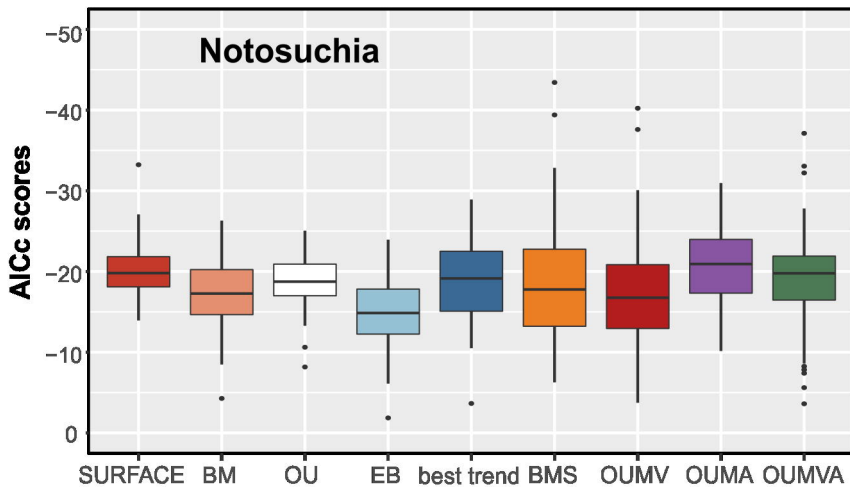

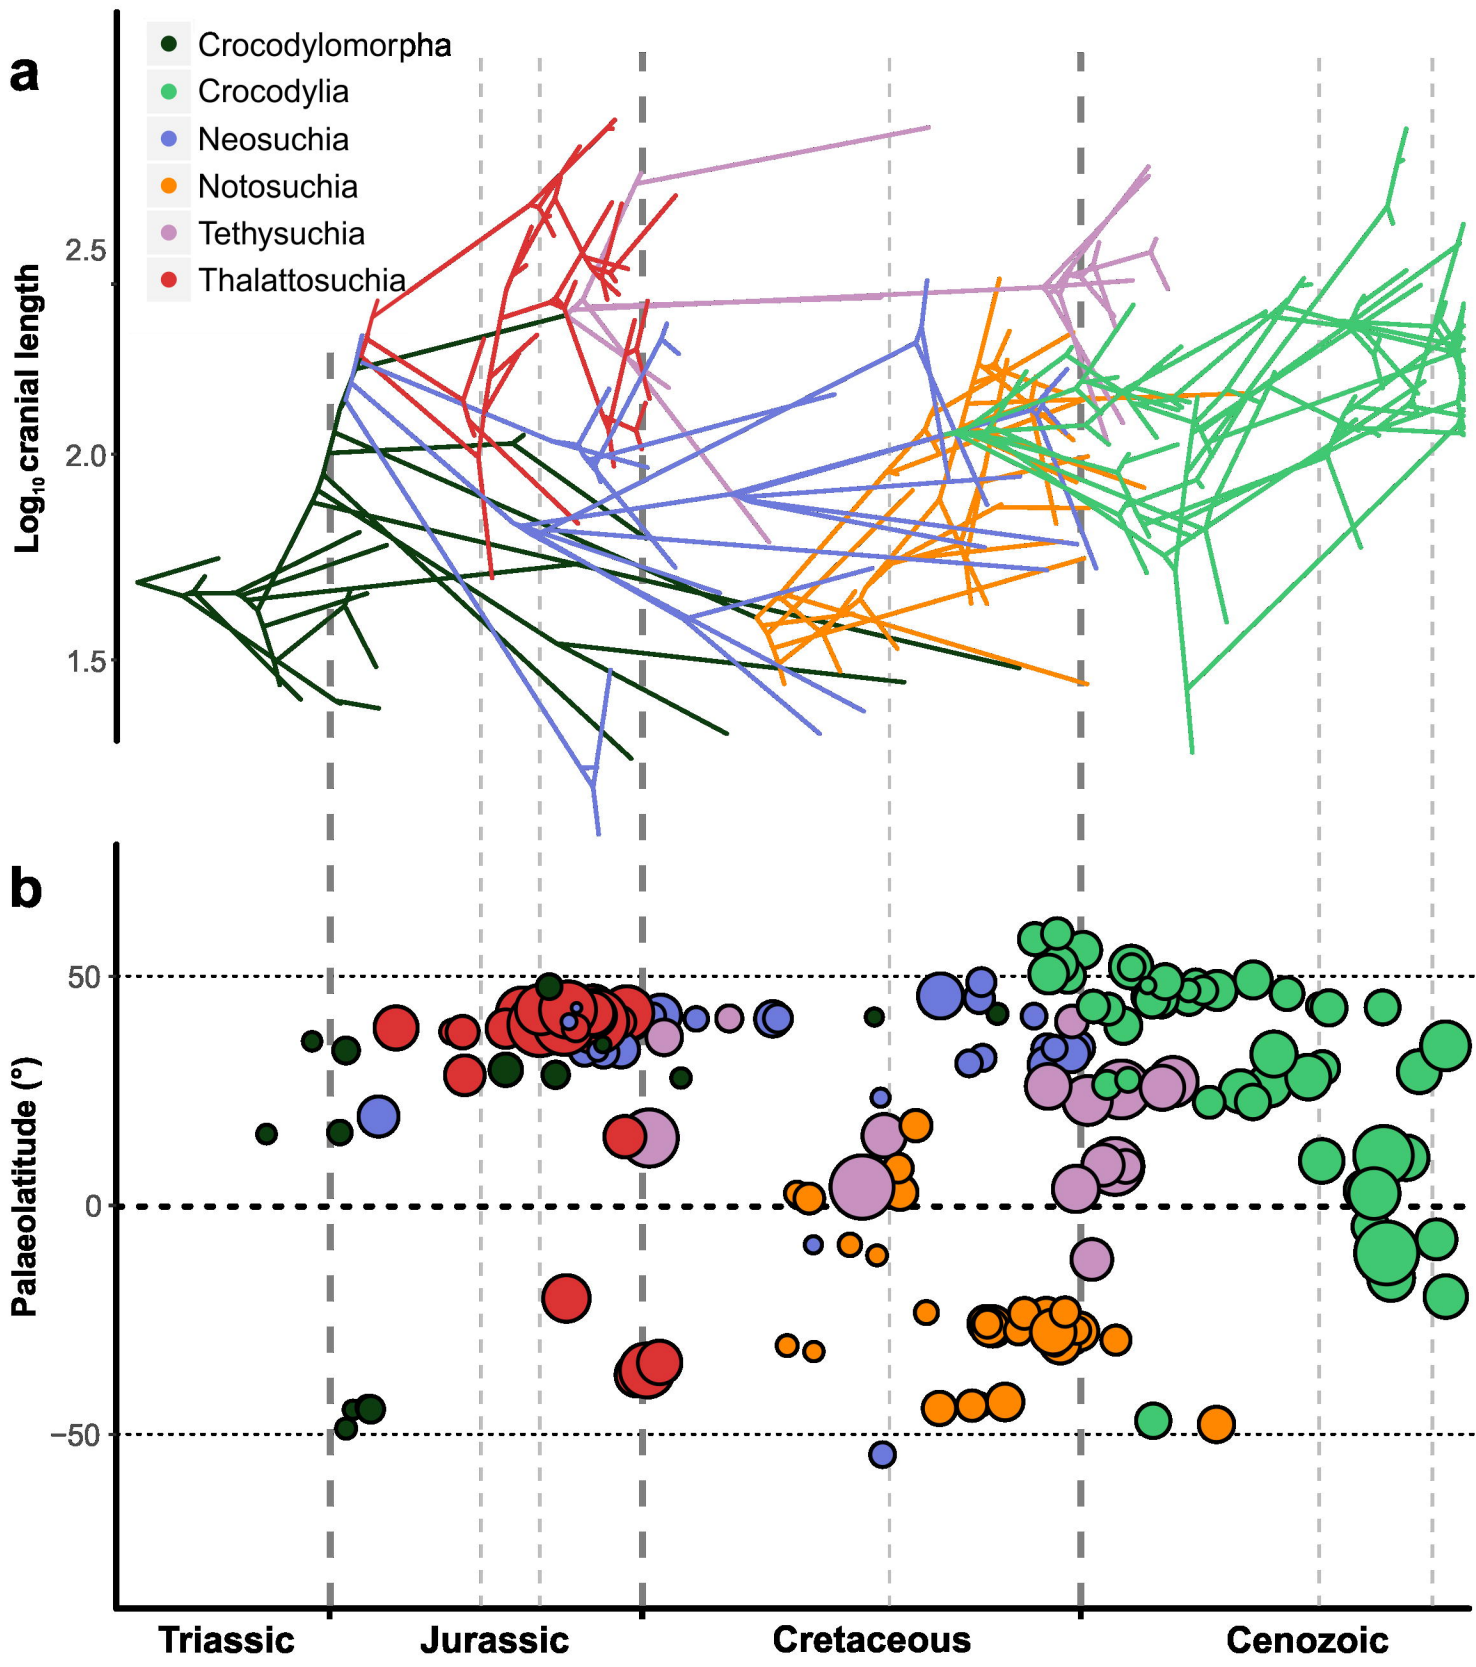

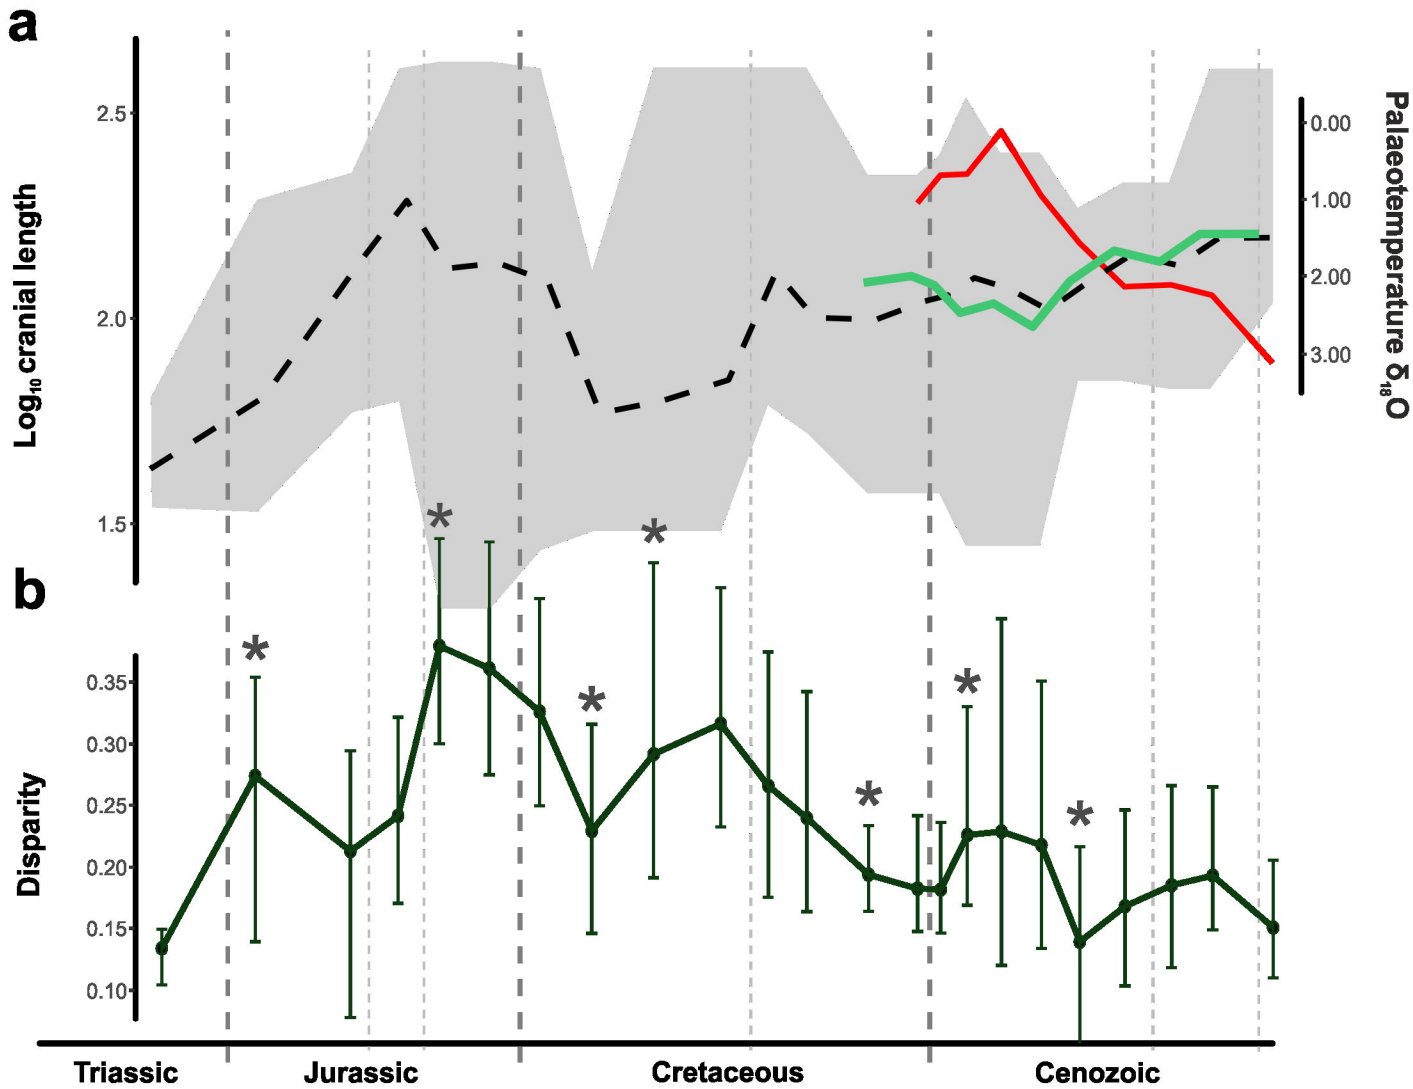

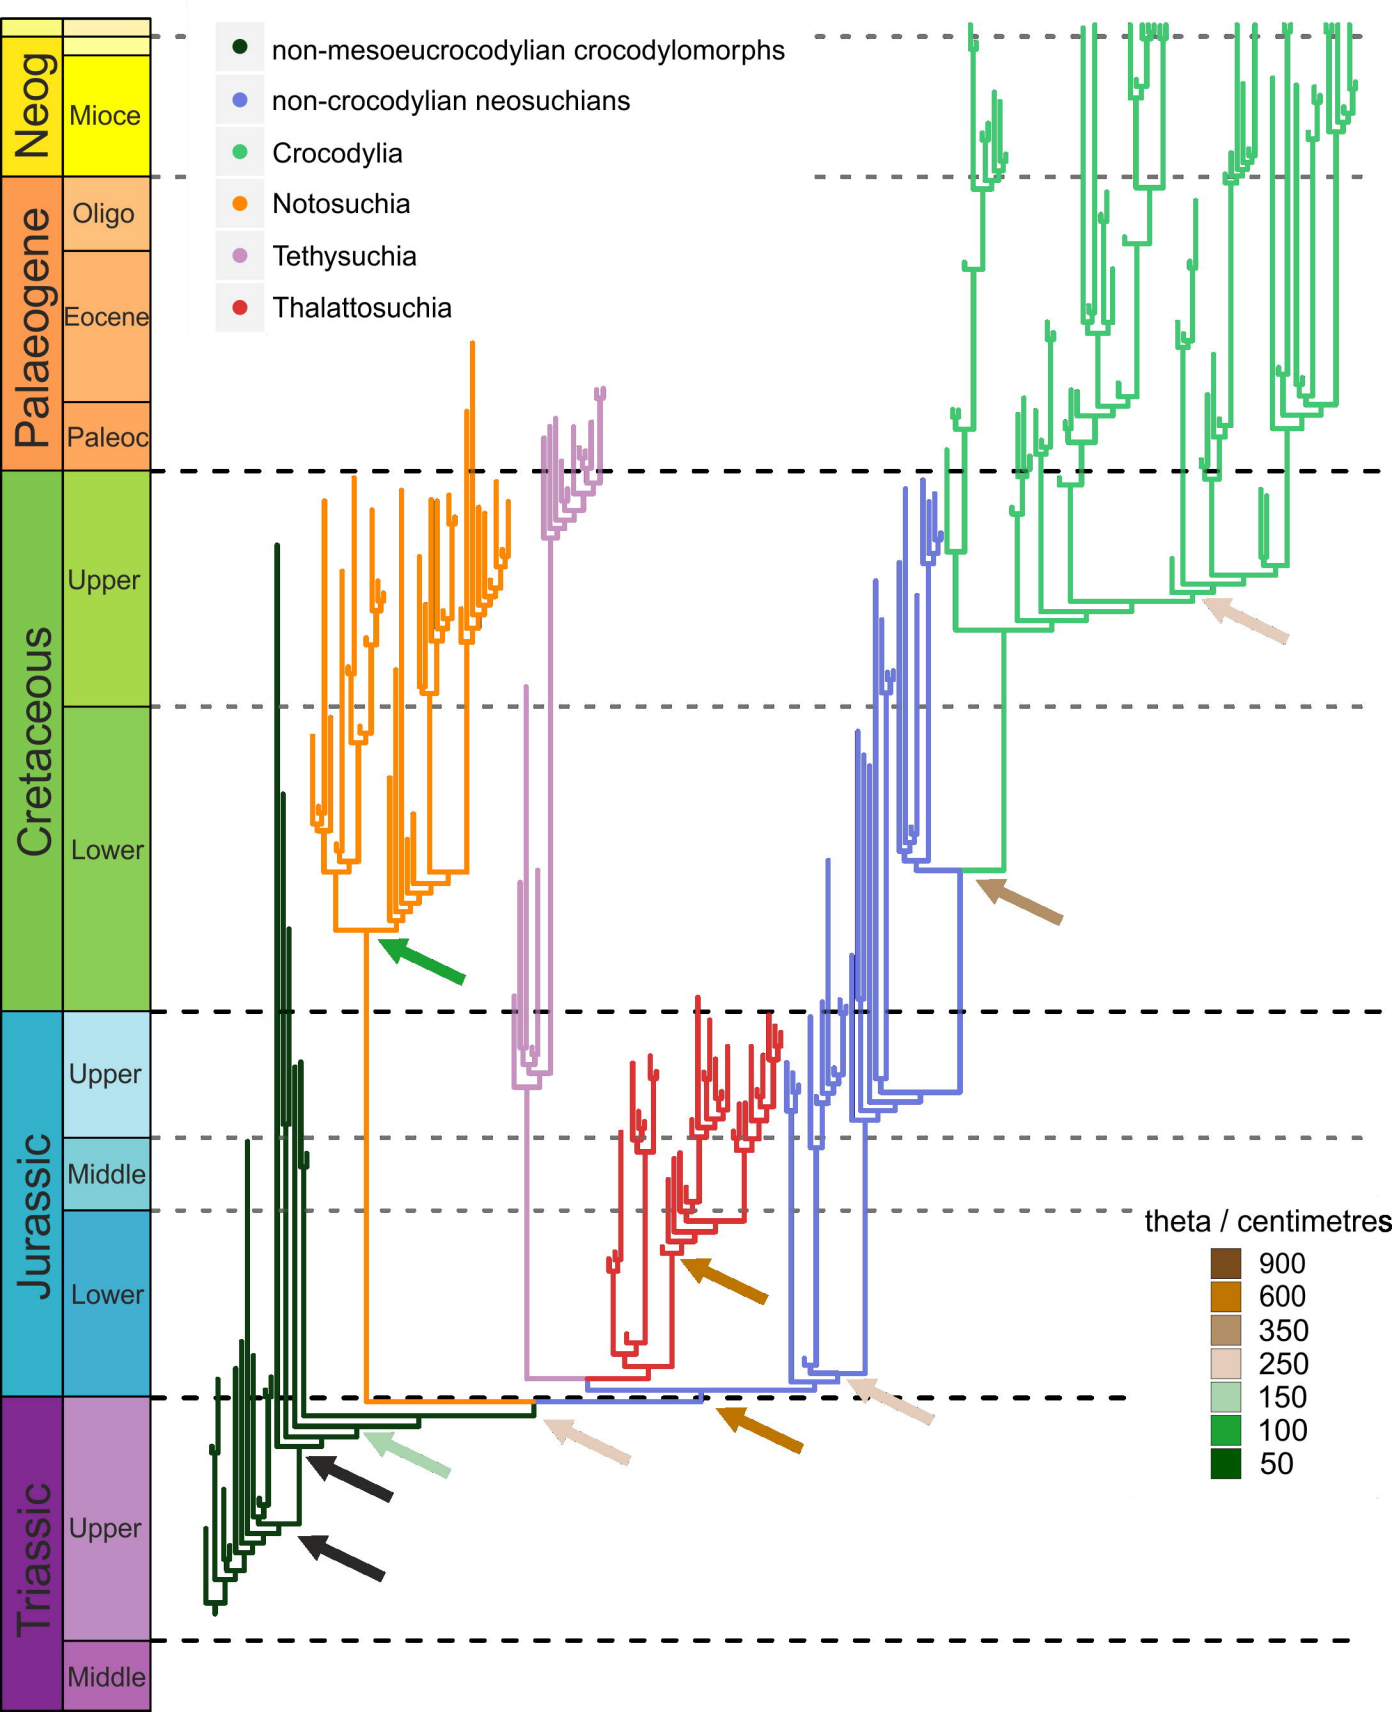

**a**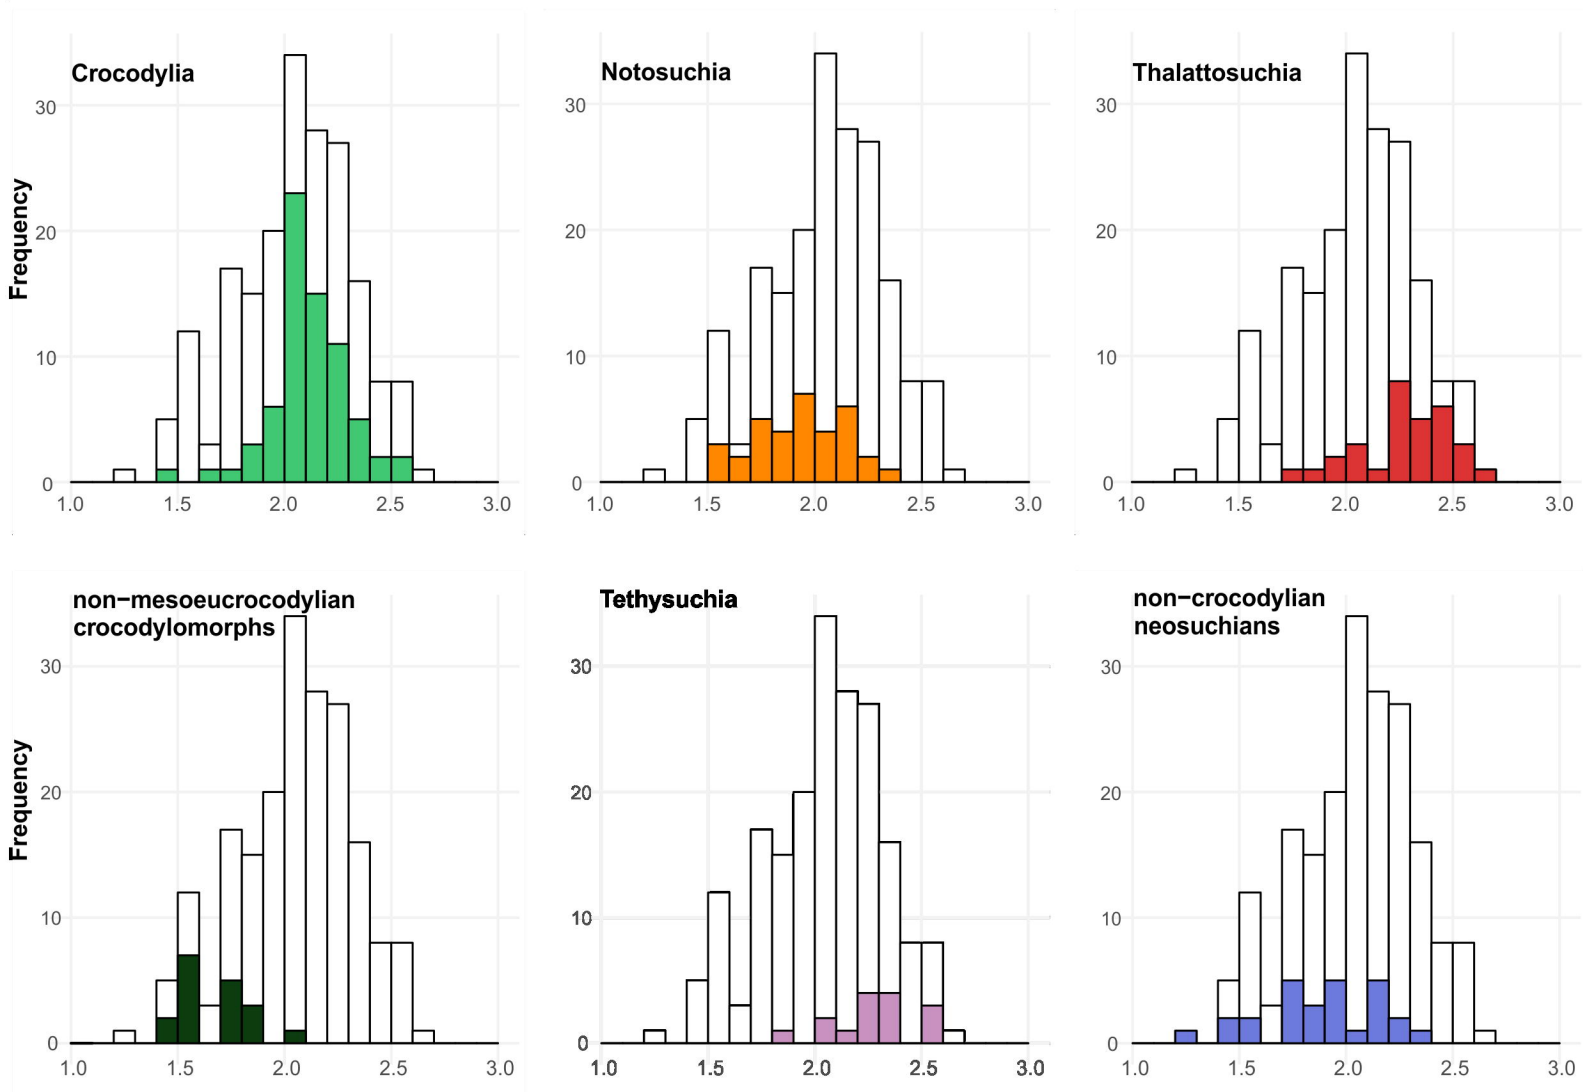**b**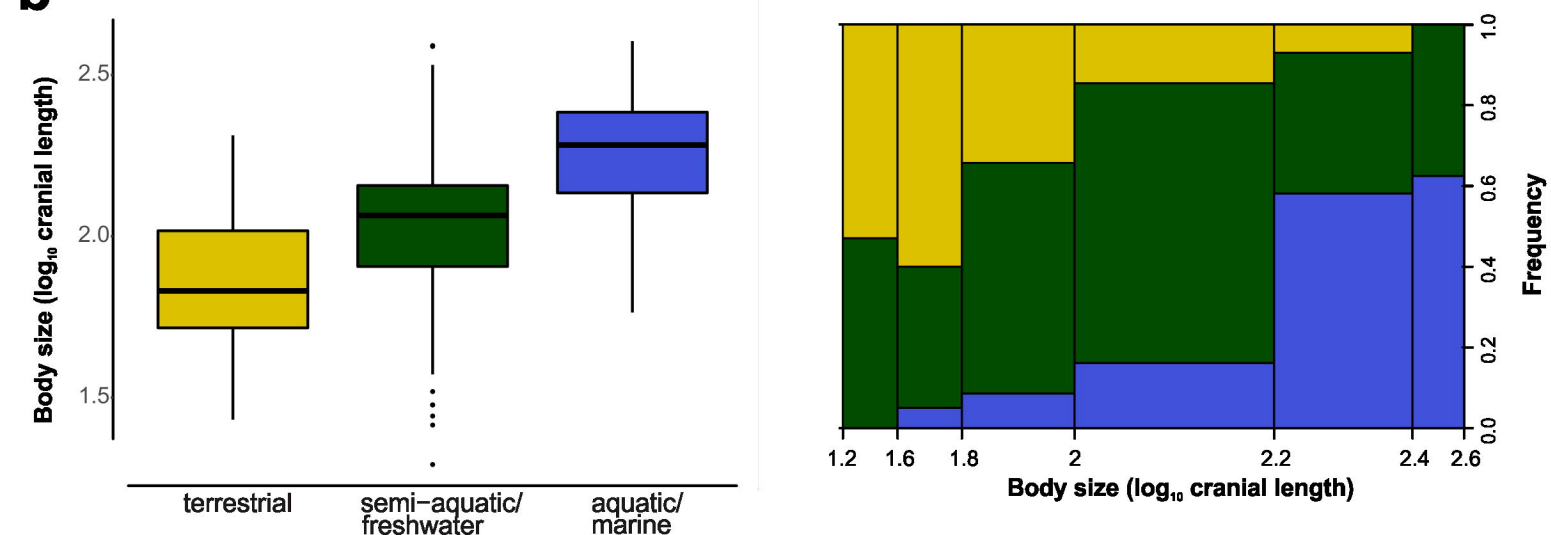

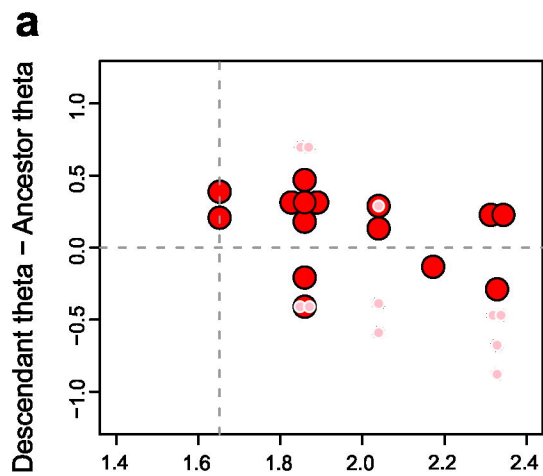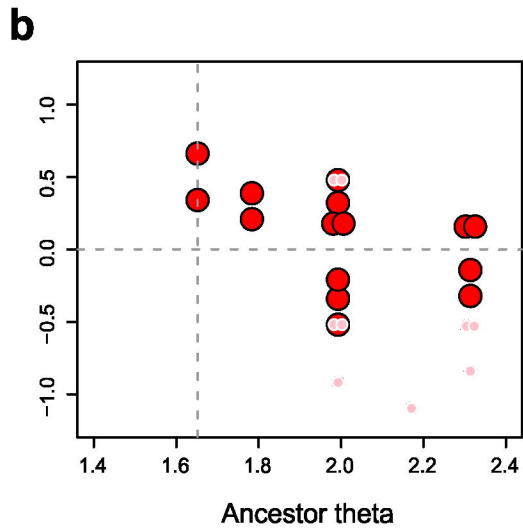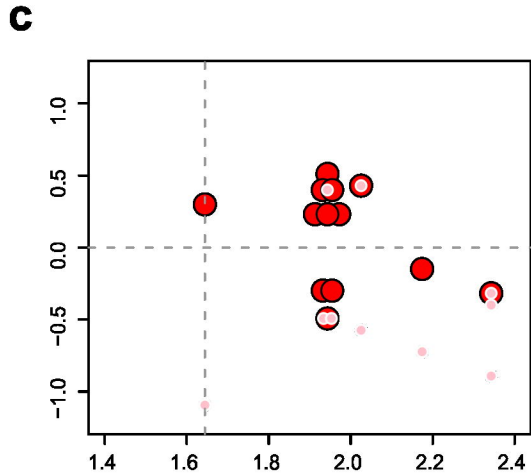



# The multi-peak adaptive landscape of crocodylomorph body size evolution

Pedro L. Godoy, Roger B. J. Benson, Mario Bronzati & Richard J. Butler

## Additional file 1

### Supplementary methods

#### *Proxy for total body length*

Equations based on modern species, using either cranial (e.g., Webb & Messel, 1978; Hall & Portier, 1994; Sereno *et al.*, 2001, Hurlburt *et al.*, 2003; Platt *et al.*, 2009; 2011) or postcranial measurements (e.g., Bustard & Singh, 1977; Farlow *et al.*, 2005), have predominantly been used for estimating total body size of extinct crocodylomorph species. Although some of these approaches have been claimed to work well when applied to extinct taxa (e.g., Farlow *et al.*, 2005), they are expected to be less accurate for extinct species that have different body proportions to those of extant species (e.g., Pol *et al.*, 2012; Young *et al.*, 2011; 2016; Godoy *et al.*, 2016; but see Figure S1). An alternative approach that has been suggested is to use clade-specific equations that are derived from regressions using fossil specimens with complete skeletons preserved, such as the recently proposed equations for estimating body length in the highly specialised marine clade Thalattosuchia (Young *et al.*, 2011; 2016). Nevertheless, using this approach for the entire Crocodylomorpha would require numerous different equations and, consequently, complete specimens for all desired subclades.

Furthermore, Campione & Evans (2012) demonstrated a universal scaling relationship between proximal (stylopodial) limb bone circumferences and the body masses of terrestrial tetrapods. For instance, their equations, using both femur and humerus circumference, have been applied to estimate body mass of fossil dinosaurs (e.g., Benson *et al.* 2014; 2018; Carballido *et*

*al.*, 2017). However, due to a historical neglect of crocodylomorph postcranial anatomy, especially for Mesozoic taxa (Godoy *et al.*, 2016), relatively less information is available on this part of the skeleton. Based on data collected for the present study, total or partial skull lengths (i.e., complete skulls or lacking only the snouts) can be measured in fossil specimens of approximately 50% of crocodylomorph species, whereas femoral and humeral shaft circumferences or lengths can only be measured in 35% of species. This greatly reduces the number of taxa that can be sampled and limits the utility of using postcranial elements as a proxy for body size. Similar problems exist for other methods, such as the “Orthometric Linear Unit” proposed by Romer & Price (1940) that uses dorsal centrum cross section (Currie, 1978), as well as volumetric reconstructions (e.g., Colbert, 1962; Hurlburt, 1999; Motani, 2001; Bates *et al.*, 2009; Sellers *et al.*, 2012), since relatively complete postcranial specimens are required.

Thus, aiming for a proxy (or proxies) for total body size that could maximised sample size (for a study encompassing the entire evolutionary history of Crocodylomorpha), we decided to use two cranial measurements: total dorsal cranial length (DCL) and dorsal orbito-cranial length (ODCL), which is measured from the anterior margin of the orbit to the posterior margin of the skull. By using actual cranial measurements, rather than estimated total body length, we avoid the addition of possible errors to our model-fitting analyses (Figure S1). Furthermore, the range of body sizes among living and extinct crocodylomorphs is considerably greater than variation among size estimates for single species. Therefore, we expect to recover the most important macroevolutionary body size changes in our analyses even when using only cranial measurements.

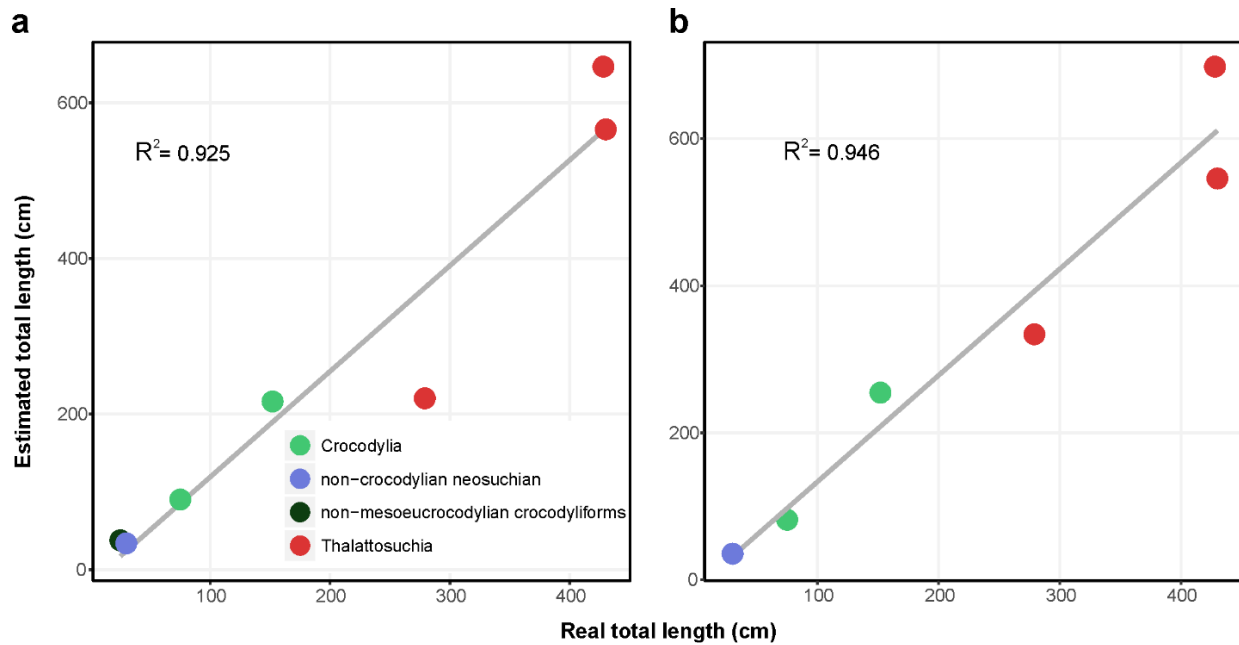

Figure S1. Expected error for total body length estimated from cranial measurements. Real total body length, measured from some complete fossil crocodylomorph specimens, is plotted against total length estimated from the cranial measurements DCL (a) and ODCL (b) (equations from Hurlburt *et al.*, 2003), exemplifying the amount of error expected when using cranial measurements to estimate total body length of crocodylomorphs.  $R^2$  value illustrates the strength of the correlation between real and estimated total lengths. Colours represent different mono- or paraphyletic crocodylomorph groups. See Table S1 for information on the specimens used for the construction of these plots.

Table S1. List of fossil specimens with complete skeleton preserved which data was used for creating Figure S1 of the manuscript. “DCL” is the total length estimated using the cranial measurement dorsal cranial length, “ODCL” is the total length estimated when using dorsal orbito-cranial length, and “Real TL” is the real total body length measured from the specimen. All measurements in centimetres.

| Species (specimen)                                | DCL    | ODCL   | Real TL | Source of information      |
|---------------------------------------------------|--------|--------|---------|----------------------------|
| <i>Shantungosuchus chuhsienensis</i> (IVPP V2484) | 37.66  | N/A    | 25      | First-hand observation     |
| <i>Alligatorellus beaumonti</i> (BSPG 1937 I 26)  | 33.77  | 35.72  | 30      | First-hand observation     |
| <i>Diplocynodon ratelii</i> (MNHN.F SG 13728ab)   | 216.15 | 254.74 | 152     | First-hand observation     |
| <i>Diplocynodon darwini</i> (HLMD-Me 10262)       | 90.02  | 81.86  | 75      | First-hand observation     |
| <i>Platysuchus multiscrobiculatus</i> (SMNS 9930) | 220.22 | 334.08 | 279     | Young <i>et al.</i> (2016) |
| <i>Steneosaurus bollensis</i> (SMNS 54063)        | 565.97 | 545.90 | 430     | Young <i>et al.</i> (2016) |
| <i>Steneosaurus leedsi</i> (NHMUK R 3806)         | 646.58 | 698.01 | 428     | Young <i>et al.</i> (2016) |

### *Supertree construction and alternative topologies*

The supertree used as the phylogenetic framework for the macroevolutionary analyses was constructed using an informal approach. For such, we started with the MRP (matrix representations with parsimony) supertree of Bronzati *et al.* (2015), and then used some recently published phylogenetic hypotheses to create and updated version, by manually modifying the tree using the software Mesquite (Version 3.51; Maddison & Maddison, 2018). For this updated version, we added some taxa, removed others, and also changed the position of a few more, always aiming to include as many species as possible (especially the ones for which we had body size data available), but also to incorporate more well-resolved relationships from recent studies.

The supertree presented by Bronzati *et al.* (2015) is restricted to Crocodyliformes, which is less inclusive than Crocodylomorpha. Thus, we added non-crocodyliform crocodylomorphs taxa following the phylogenetic hypotheses presented by Pol *et al.* (2013) and Leardi *et al.* (2017). Within Crocodyliformes, as in Bronzati *et al.* (2015) and other recent studies (e.g., Andrade *et al.*, 2011; Montefeltro *et al.*, 2013; Pol *et al.*, 2014; Turner & Pritchard, 2015; Buscalioni, 2017), taxa classically associated to “Protosuchia” are paraphyletic arranged in relation to Mesoeucrocodylia, with smaller subgroups displayed following Bronzati *et al.* (2015) (but see below for differences in this region of the tree in the alternative topologies).

Accordingly, *Hsisosuchus* is the sister-group of Mesoeucrocodylia (as in Clark, 2011, Pol *et al.*, 2014; Buscalioni, 2017) and the following groups represent taxa successively more distant to Mesoeucrocodylia: Shartegosuchidae (following Clark 2011); an unnamed clade composed by taxa such as *Sichuanosuchus* and *Shantungosuchus*; an unnamed clade composed by *Zaraasuchus* and *Gobiosuchus* (following Pol *et al.*, 2014); Protosuchidae (following Clark 2011; Pol *et al.*, 2014; Turner & Pritchard, 2015).

Within Mesoeucrocodylia, Notosuchia corresponds to the sister group of all the other mesoeucrocodylians (= Neosuchia in our topology), similar to what is presented by Andrade *et al.* (2011), Pol *et al.* (2014), and Turner & Pritchard (2015). Yet, Notosuchia comprises forms such as baurusuchids, sebecosuchians, peirosaurids, sphagesaurids, uruguaysuchids, and *Araripesuchus*. The relationships among taxa within Notosuchia follow the general arrangement presented by Pol *et al.* (2014).

One of the branches at the basal split of Neosuchia leads to a clade composed by longirostrine forms, which includes Thalattosuchia and Tethysuchia (i.e. Dyrosauridae and “pholidosaurids”). Arrangement between these groups (i.e. sister-group relationship between Thalattosuchia and Tethysuchia) follows that recovered in the supertree of Bronzati *et al.* (2015). Within Tethysuchia, “pholidosaurids” are paraphyletic in relation to Dyrosauridae (also found in Pol *et al.*, 2014; Young *et al.*, 2017 and Meunier & Larsson, 2017). Relationships among Dyrosauridae follow Hastings *et al.* (2015). Relationships among thalattosuchians follow Young (2014) and Herrera *et al.* (2015).

The sister-group of the longirostrine clade mentioned above contains Eusuchia and its closest relatives such as Atoposauridae and Goniopholididae. The latter is depicted as the sister group of Eusuchia, whereas the former corresponds to the sister group of Eusuchia + Goniopholididae. This arrangement follows that recovered in Pol *et al.* (2014) and Bronzati *et al.* (2015). Regarding the internal relationships of Goniopholididae, we follow the hypotheses of Martin *et al.* (2016) and Ristevski *et al.* (2018). For Atoposauridae, we follow the arrangements presented by Tennant *et al.* (2016) and Schwarz *et al.* (2017). For Paralligatoridae and Suisuchidae, we followed the phylogenetic hypotheses of Turner (2015) and Turner & Pritchard (2015).

In relation to non-crocodylian eusuchians, we mainly follow the topology of Bronzati *et al.* (2015), with modifications to accommodate the arrangements proposed by Turner (2015) and Turner & Pritchard (2015) within Paralligatoridae and Susisuchidae. Regarding the interrelationships of the crown-group, as well as the position of Hylaeochampsidae + Allodaposuchidae as the sister group of Crocodylia, we follow the topology of Narváez *et al.* (2015). For the relationships within the crown-group, we follow Brochu (2012), Brochu *et al.* (2012), Scheyer *et al.* (2013) and Narváez *et al.* (2015).

Additionally, two alternative topologies were also manually constructed, for testing the impact of alternative positions of Thalattosuchia. The “longirostrine problem”, which mostly concerns the position of Thalattosuchia, has been largely debated in phylogenetic studies of Crocodylomorpha (e.g., Clark, 1994; Pol & Gasparini, 2009; Wilberg, 2015). Because of the possible impact that a group like Thalattosuchia (i.e. of relatively old origin and many species within it) can inflict in our model-fitting analyses, we built two alternative trees to test the effects related to this phylogenetic uncertainty. Apart from the position of Thalattosuchia described above (within Neosuchia), two main alternative scenarios for the position of the group within Crocodylomorpha were proposed (see Wilberg, 2015). The first places Thalattosuchia as the sister group of all other mesoeucrocodylians (= Notosuchia + Neosuchia) (e.g., Larsson & Sues, 2007; Montefeltro *et al.*, 2013), and was depicted in one of our alternative topologies. The other alternative topology places Thalattosuchia as the sister group of Crocodyliformes (following Wilberg, 2015). Only the position of Thalattosuchia has been altered in these alternative topologies. Relationships among other taxa, including the relationship among thalattosuchians, were kept as in the first topology, described above.

### *Additional time-scaling methods*

For time-calibrating our trees, apart from the Bayesian tip-dating approach, we also used three different *a posteriori* time-scaling (APT) methods: the minimum branch length (*mbl*), the *cal3* and the *extended Hedman* methods. These methods were used only for the initial model comparison.

For these methods, ages (first and last occurrence dates) were initially obtained from the Paleobiology Database, but were then checked using primary sources in the literature (see Additional file 6 for ages of all taxa). To accommodate uncertainties related to the ages of terminal taxa (i.e., most taxon ages are based on single occurrences, known only within rather imprecise bounds), we treated these first and last occurrences dates as maximum and minimum possible ages and drew terminal dates for time-calibration from a uniform distribution between these.

First, the *mbl* method (Laurin, 2004), which requires a minimum branch duration to be set *a priori*, to avoid the presence of undesirable and unrealistic zero-length branches (Bapst, 2014*a*, *b*). For our analyses, the minimum of 1 Myr was set.

Second, the *cal3* method, which is a stochastic calibration method that requires estimates of sampling and diversification (branching and extinction) rates to draw likely divergence dates under a birth–death–sampling model (Bapst, 2014; Lloyd *et al.*, 2016). The fact that most crocodylomorph taxa are singletons (i.e., very few genera or species have multiple occurrences in different time intervals) prevented us from directly calculating speciation, extinction and sampling rates needed as inputs to the *cal3* method. Thus, when using this time-scaling method for our analyses, we adopted the same rates estimated for dinosaurs in Lloyd *et al.* (2016) (i.e., extinction and speciation rates = 0.935; sampling rate = 0.018), which used the apparent range-frequency distribution of dinosaurs in the Paleobiology Database for these estimates. Although

essentially different from that of dinosaurs, the crocodylomorph fossil record is arguably comparable enough to result in similar rates (i.e., in both groups, many species are based on only single occurrences, having therefore no meaningful range data; Benson *et al.*, 2018), and a *posteriori* comparison to other time-scaling methods demonstrated that results were qualitatively reasonable.

Finally, the *extended Hedman* method was proposed by Lloyd *et al.* (2016), and is an expansion of the approach presented by Hedman (2010). It is a probabilistic method that uses the ages of successive outgroup taxa relative to the age of the node of interest to date this node by sampling from uniform distributions (Lloyd *et al.* 2016, Brocklehurst, 2017).

Since the input phylogenies (i.e., the three alternative topologies of the supertree, see above) were not completely resolved, we randomly resolved the polytomies, generating 20 completely resolved trees (the same number of trees was time-scaled with the FBD method) for each alternative phylogenetic scenario (i.e., with different positions of Thalattosuchia). These trees were then time-scaled using the three time-calibration methods. Time-scaling with the *mb1* and *cal3* methods were performed using the package *paleotree* (Bapst, 2012) in R version 3.5.1 (R Core Team, 2018), whilst the *Hedman* method was implemented also in R, using the protocol published by Lloyd *et al.* (2016).



*Time bins used for time series correlations and disparity calculation*

| LOWER LIMIT (IN MYR) | UPPER LIMIT (IN MYR) |
|----------------------|----------------------|
| 7.246                | 0                    |
| 15.97                | 7.246                |
| 23.03                | 15.97                |
| 33.9                 | 23.03                |
| 40.4                 | 33.9                 |
| 48.6                 | 40.4                 |
| 55.8                 | 48.6                 |
| 61.7                 | 55.8                 |
| 66.043               | 61.7                 |
| 70.6                 | 66.043               |
| 84.9                 | 70.6                 |
| 94.3                 | 84.9                 |
| 99.7                 | 94.3                 |
| 112.6                | 99.7                 |
| 125.45               | 112.6                |
| 136.4                | 125.45               |
| 145.5                | 136.4                |
| 155.7                | 145.5                |
| 164.7                | 155.7                |
| 171.6                | 164.7                |
| 183                  | 171.6                |
| 189.6                | 183                  |
| 201.6                | 189.6                |
| 205.6                | 201.6                |
| 221.5                | 205.6                |
| 235                  | 221.5                |
| 242                  | 235                  |
| 252.3                | 242                  |

## Supplementary results

### *FBD consensus trees*

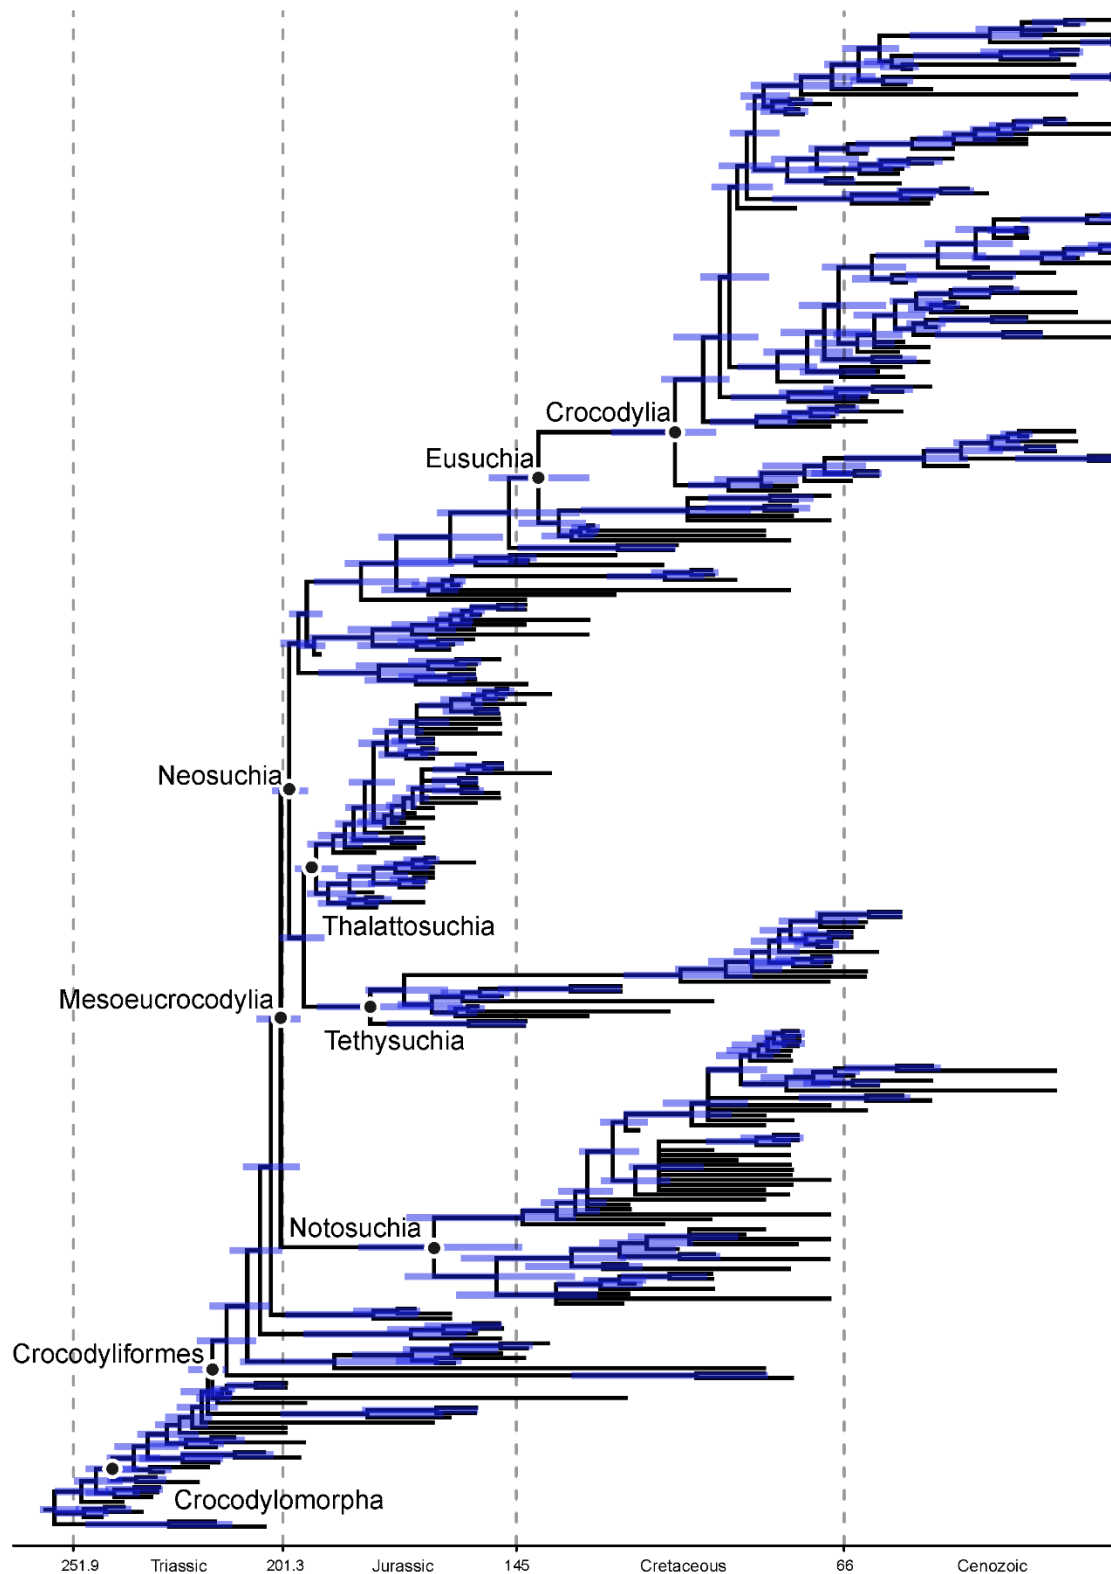

Figure S2. Consensus tree (50% majority rule tree) of Crocodylomorpha, with Thalattosuchia within Neosuchia. Node ages were inferred under a fossilized birth-death process, performing 10,000,000 generations of MCMC analyses. Blue bars indicate 95% Highest Posterior Density (HPD) time intervals.

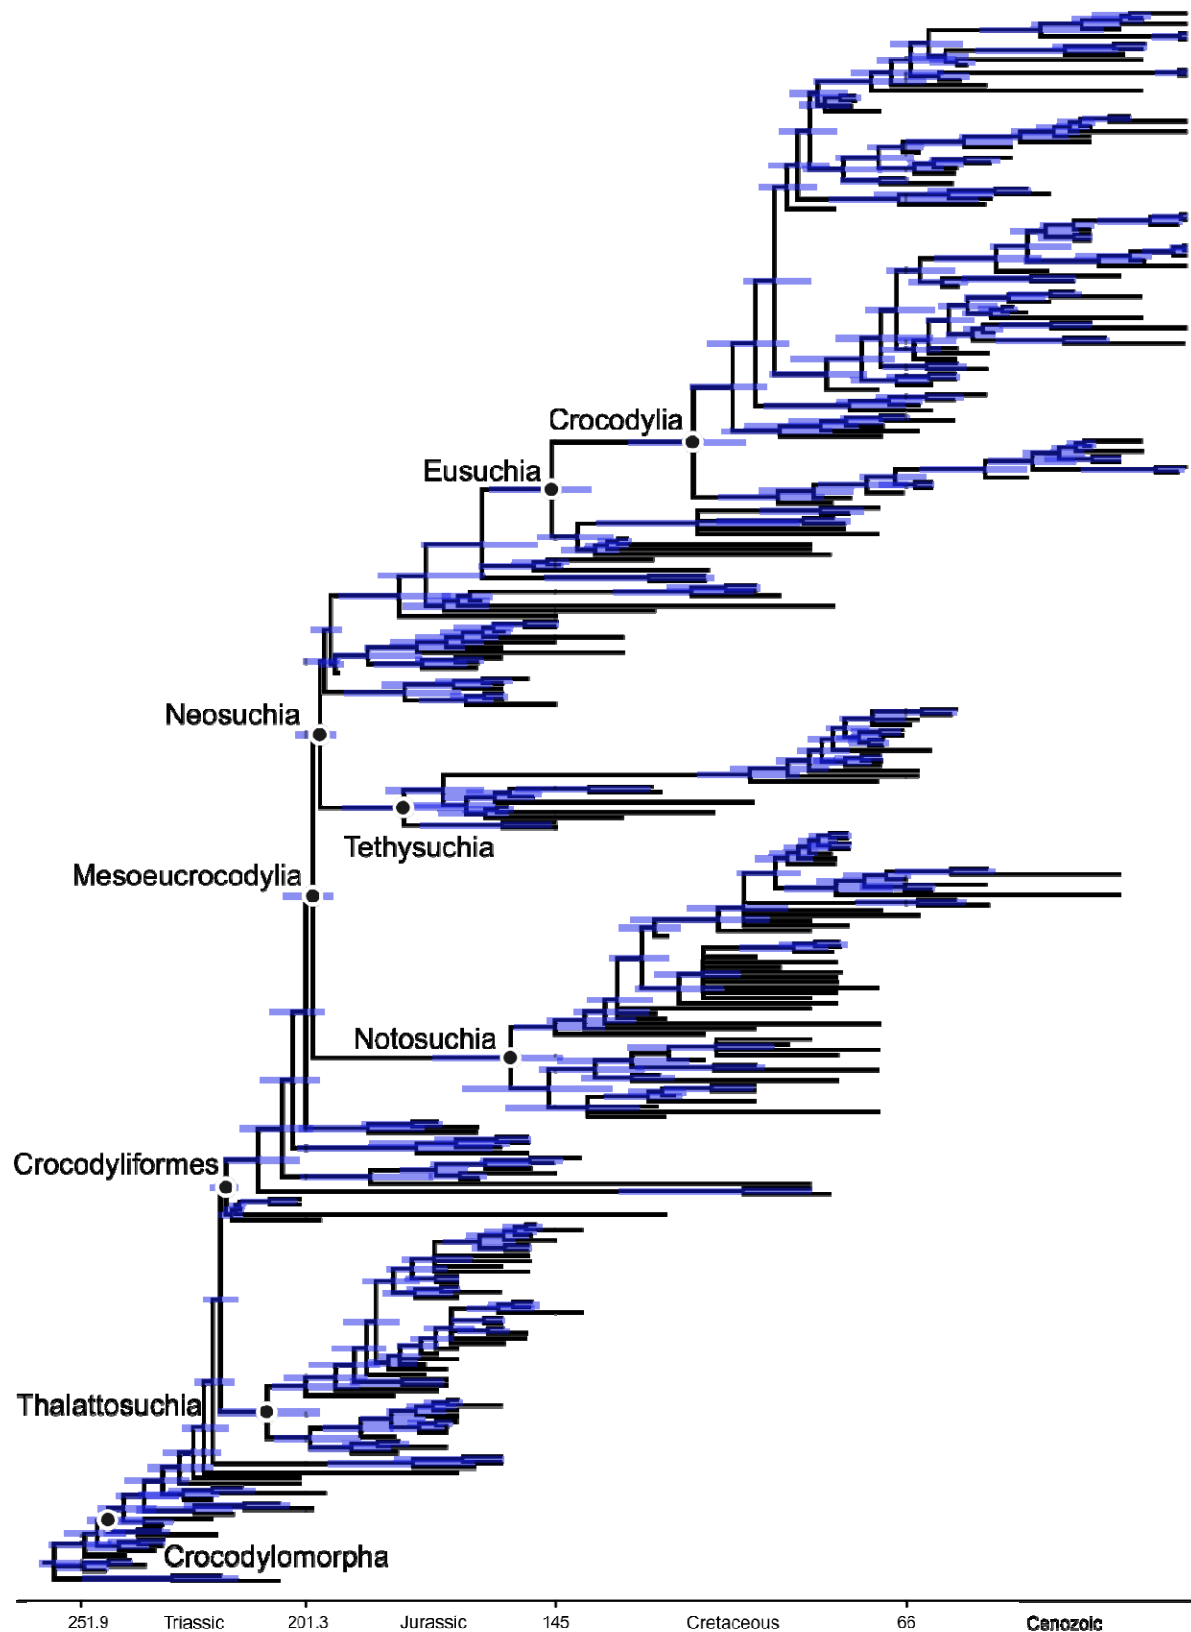

Figure S3. Consensus tree (50% majority rule tree) of Crocodylomorpha, with Thalattosuchia as the sister group of Crocodyliformes. Node ages were inferred under a fossilized birth-death process, performing 10,000,000 generations of MCMC analyses. Blue bars indicate 95% Highest Posterior Density (HPD) time intervals.

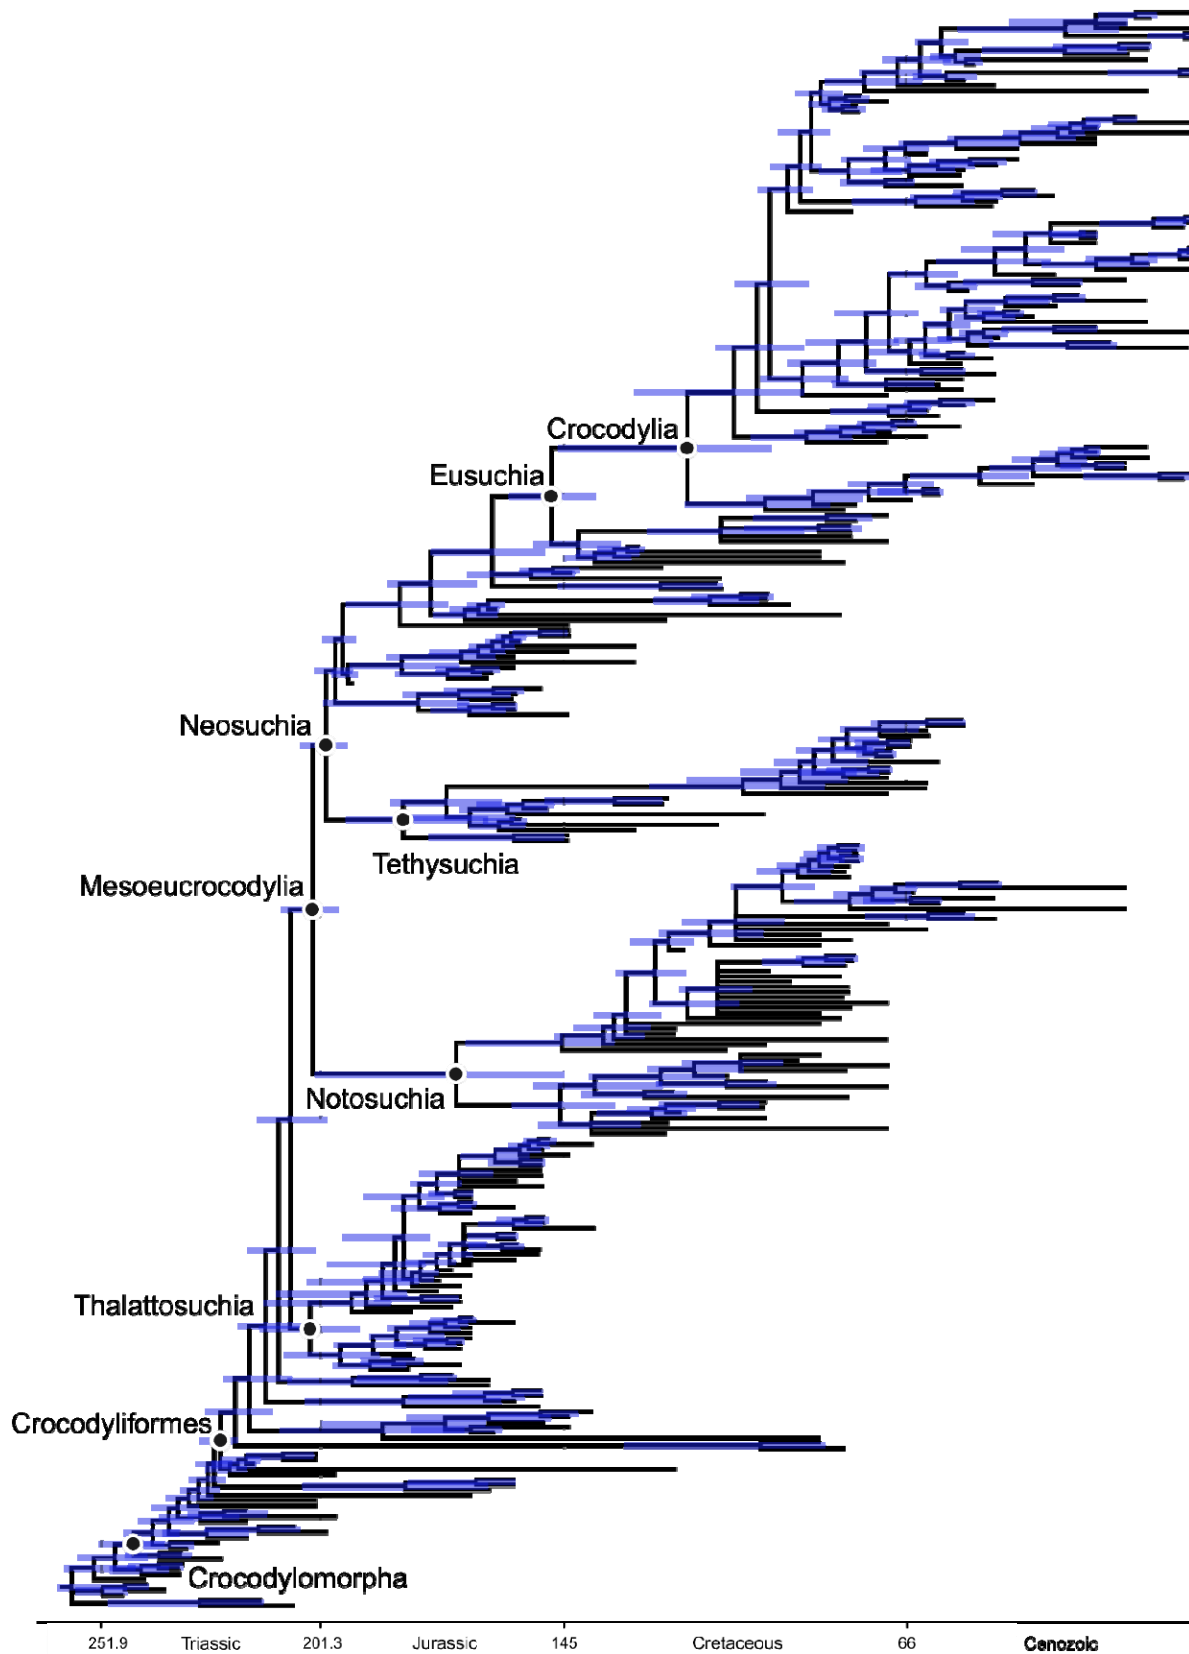

Figure S4. Consensus tree (50% majority rule tree) of Crocodylomorpha, with Thalattosuchia as the sister group of Mesoeucrocodylia. Node ages were inferred under a fossilized birth-death process, performing 10,000,000 generations of MCMC analyses. Blue bars indicate 95% Highest Posterior Density (HPD) time intervals.

*Initial model comparison using APT time-scaling methods*

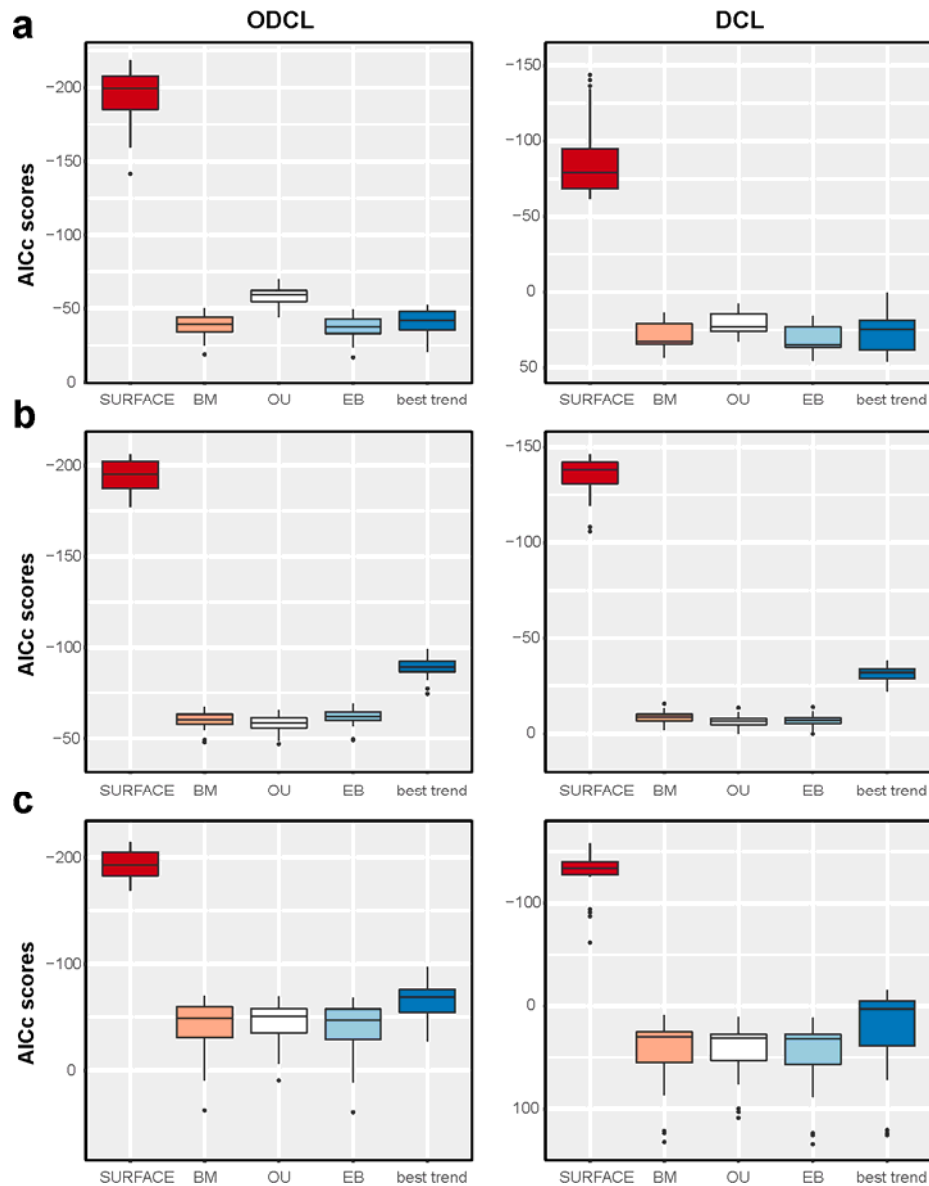

Figure S5. AICc scores of the evolutionary models fitted to crocodylomorph phylogeny and body size data. Results shown for two cranial measurements datasets (ODCL in the left column and DCL in the right one), as well as using three different APT time-scaling (i.e., *a posteriori*) methods to time-calibrate 20 randomly resolved phylogenies of Crocodylomorpha: (a) mbl, (b) Hedman, and (c) cal3 methods. For the trend-like models, only the AICc of the best model (“best trend”) is shown.

### *Correlations with abiotic factors*

Most of the regression analyses with body size and palaeotemperature data (Tables S3– S16) revealed very weak or non-significant correlations. In some cases, we did find significant correlations, but they were frequently inconsistent (i.e., correlations did not persist in both ODCL and DCL datasets or were absent when accounting for serial autocorrelation using GLS). The only conspicuous exception was found between mean body size values and palaeotemperatures from the Late Cretaceous (Maastrichtian) to the Recent (and, in particular, when using only taxa of the crown-group Crocodylia [Tables S8 and S9]).

A similar scenario was found for the correlation test between body size and paleolatitude (Tables S17– S30), with very weak or non-significant correlations. Our phylogenetic regressions of found some significant correlations, but in all cases the coefficient of determination ( $R^2$ ) was very low (always smaller than 0.1), indicating that the correlation is very weak and only a small proportion (less than 10%) of the body size variation observed can be explained by the palaeolatitudinal data.

Palaeotemperature

**Table S3.** Results of regressions of body size proxy (maximum and mean log-transformed ODCL, using all species in the dataset) on the palaeotemperature proxies ( $\delta^{18}\text{O}$  data for tropical and temperate regions from Prokoph *et al.* (2008), and global  $\delta^{18}\text{O}$  data from Zachos *et al.* (2008)). Possible correlation was analysed using generalised least squares (GLS) regressions, incorporating a first-order autoregressive model, as well as ordinary least squares (OLS) regressions using untransformed data (assuming no serial correlation). \*Significant at alpha = 0.05.

| <b>Prokoph (Early Triassic -recent): tropical palaeotemperatures</b>  |              |       |                   |                     |                |           |                   |         |        |                     |                   |         |                |       |                   |         |
|-----------------------------------------------------------------------|--------------|-------|-------------------|---------------------|----------------|-----------|-------------------|---------|--------|---------------------|-------------------|---------|----------------|-------|-------------------|---------|
| N                                                                     | Maximum size |       |                   |                     |                | Mean size |                   |         |        |                     |                   |         |                |       |                   |         |
|                                                                       | GLS          |       |                   | OLS (untransformed) |                | GLS       |                   |         |        | OLS (untransformed) |                   |         |                |       |                   |         |
|                                                                       | Phi          | Int.  | Slope             | AIC                 | R <sup>2</sup> | Int.      | Slope             | AIC     | Phi    | Int.                | Slope             | AIC     | R <sup>2</sup> | Int.  | Slope             | AIC     |
| 26                                                                    | 0.643        | 2.363 | 0.019<br>(0.75)   | 2.565               | -0.004         | 2.438     | 0.063<br>(0.359)  | 11.94   | 0.741  | 1.973               | -0.015<br>(0.685) | -20.353 | 0.004          | 2.073 | 0.049<br>(0.299)  | -7.032  |
| <b>Prokoph (Early Triassic -recent): temperate palaeotemperatures</b> |              |       |                   |                     |                |           |                   |         |        |                     |                   |         |                |       |                   |         |
| N                                                                     | Maximum size |       |                   |                     |                | Mean size |                   |         |        |                     |                   |         |                |       |                   |         |
|                                                                       | GLS          |       |                   | OLS (untransformed) |                | GLS       |                   |         |        | OLS (untransformed) |                   |         |                |       |                   |         |
|                                                                       | Phi          | Int.  | Slope             | AIC                 | R <sup>2</sup> | Int.      | Slope             | AIC     | Phi    | Int.                | Slope             | AIC     | R <sup>2</sup> | Int.  | Slope             | AIC     |
| 23                                                                    | 0.241        | 2.428 | -0.015<br>(0.729) | -15.324             | -0.038         | 2.426     | -0.017<br>(0.671) | -16.034 | 0.412  | 2.067               | 0.011<br>(0.755)  | -22.54  | -0.027         | 2.079 | 0.022<br>(0.529)  | -20.973 |
| <b>Zachos (Late Cretaceous - recent): global palaeotemperatures</b>   |              |       |                   |                     |                |           |                   |         |        |                     |                   |         |                |       |                   |         |
| N                                                                     | Maximum size |       |                   |                     |                | Mean size |                   |         |        |                     |                   |         |                |       |                   |         |
|                                                                       | GLS          |       |                   | OLS (untransformed) |                | GLS       |                   |         |        | OLS (untransformed) |                   |         |                |       |                   |         |
|                                                                       | Phi          | Int.  | Slope             | AIC                 | R <sup>2</sup> | Int.      | Slope             | AIC     | Phi    | Int.                | Slope             | AIC     | R <sup>2</sup> | Int.  | Slope             | AIC     |
| 10                                                                    | 0.347        | 2.34  | 0.045<br>(0.397)  | -9.539              | -0.016         | 2.346     | 0.039<br>(0.383)  | -10.306 | -0.046 | 2.022               | 0.055*<br>(0.002) | -31.576 | 0.635          | 2.023 | 0.054*<br>(0.003) | -33.557 |

Table S4. Results of regressions of body size proxy (maximum and mean log-transformed DCL, using all species in the dataset) on the palaeotemperature proxies ( $\delta^{18}\text{O}$  data for tropical and temperate regions from Prokoph *et al.* (2008), and global  $\delta^{18}\text{O}$  data from Zachos *et al.* (2008)). Possible correlation was analysed using generalised least squares (GLS) regressions, incorporating a first-order autoregressive model, as well as ordinary least squares (OLS) regressions using untransformed data (assuming no serial correlation). \*Significant at alpha = 0.05.

| <b>Prokoph (Early Triassic -recent): tropical palaeotemperatures</b>  |              |       |                  |         |                     |       |                   |         |           |       |                   |         |                     |       |                  |         |
|-----------------------------------------------------------------------|--------------|-------|------------------|---------|---------------------|-------|-------------------|---------|-----------|-------|-------------------|---------|---------------------|-------|------------------|---------|
| N                                                                     | Maximum size |       |                  |         |                     |       |                   |         | Mean size |       |                   |         |                     |       |                  |         |
|                                                                       | GLS          |       |                  |         | OLS (untransformed) |       |                   |         | GLS       |       |                   |         | OLS (untransformed) |       |                  |         |
|                                                                       | Phi          | Int.  | Slope            | AIC     | R <sup>2</sup>      | Int.  | Slope             | AIC     | Phi       | Int.  | Slope             | AIC     | R <sup>2</sup>      | Int.  | Slope            | AIC     |
| 26                                                                    | 0.634        | 2.909 | 0.048<br>(0.508) | 11.415  | 0.031               | 3.01  | 0.106<br>(0.19)   | 20.16   | 0.723     | 2.367 | -0.029<br>(0.565) | -6.284  | -0.027              | 2.47  | 0.035<br>(0.564) | 7.111   |
| <b>Prokoph (Early Triassic -recent): temperate palaeotemperatures</b> |              |       |                  |         |                     |       |                   |         |           |       |                   |         |                     |       |                  |         |
| N                                                                     | Maximum size |       |                  |         |                     |       |                   |         | Mean size |       |                   |         |                     |       |                  |         |
|                                                                       | GLS          |       |                  |         | OLS (untransformed) |       |                   |         | GLS       |       |                   |         | OLS (untransformed) |       |                  |         |
|                                                                       | Phi          | Int.  | Slope            | AIC     | R <sup>2</sup>      | Int.  | Slope             | AIC     | Phi       | Int.  | Slope             | AIC     | R <sup>2</sup>      | Int.  | Slope            | AIC     |
| 23                                                                    | 0.108        | 2.956 | -0.025<br>(0.57) | -11.036 | -0.033              | 2.958 | -0.022<br>(0.602) | -12.782 | 0.505     | 2.468 | -0.007<br>(0.888) | -6.265  | -0.041              | 2.496 | 0.019<br>(0.725) | -2.48   |
| <b>Zachos (Late Cretaceous - recent): global palaeotemperatures</b>   |              |       |                  |         |                     |       |                   |         |           |       |                   |         |                     |       |                  |         |
| N                                                                     | Maximum size |       |                  |         |                     |       |                   |         | Mean size |       |                   |         |                     |       |                  |         |
|                                                                       | GLS          |       |                  |         | OLS (untransformed) |       |                   |         | GLS       |       |                   |         | OLS (untransformed) |       |                  |         |
|                                                                       | Phi          | Int.  | Slope            | AIC     | R <sup>2</sup>      | Int.  | Slope             | AIC     | Phi       | Int.  | Slope             | AIC     | R <sup>2</sup>      | Int.  | Slope            | AIC     |
| 10                                                                    | 0.265        | 2.9   | 0.049<br>(0.126) | -19.517 | 0.27                | 2.898 | 0.052<br>(0.07)   | -20.96  | 0.014     | 2.433 | 0.081*<br>(0.011) | -19.577 | 0.527               | 2.433 | 0.081*<br>(0.01) | -21.575 |



Table S5. Results of regressions of body size proxy (maximum and mean log-transformed ODCL, using only marine species in the dataset) on the palaeotemperature proxies ( $\delta^{18}\text{O}$  data for tropical and temperate regions from Prokoph *et al.* (2008), and global  $\delta^{18}\text{O}$  data from Zachos *et al.* (2008)). Possible correlation was analysed using generalised least squares (GLS) regressions, incorporating a first-order autoregressive model, as well as ordinary least squares (OLS) regressions using untransformed data (assuming no serial correlation). \*Significant at alpha = 0.05.

| <b>Prokoph (Early Triassic -recent): tropical palaeotemperatures</b>  |              |       |                   |         |                     |       |                   |         |           |       |                   |         |                     |       |                   |         |
|-----------------------------------------------------------------------|--------------|-------|-------------------|---------|---------------------|-------|-------------------|---------|-----------|-------|-------------------|---------|---------------------|-------|-------------------|---------|
| N                                                                     | Maximum size |       |                   |         |                     |       |                   |         | Mean size |       |                   |         |                     |       |                   |         |
|                                                                       | GLS          |       |                   |         | OLS (untransformed) |       |                   |         | GLS       |       |                   |         | OLS (untransformed) |       |                   |         |
|                                                                       | Phi          | Int.  | Slope             | AIC     | R <sup>2</sup>      | Int.  | Slope             | AIC     | Phi       | Int.  | Slope             | AIC     | R <sup>2</sup>      | Int.  | Slope             | AIC     |
| 18                                                                    | 0.56         | 2.358 | -0.025<br>(0.536) | -25.542 | 0.201               | 2.276 | -0.11*<br>(0.035) | -24.167 | 0.014     | 2.239 | -0.017<br>(0.451) | -49.171 | -0.023              | 2.239 | -0.017<br>(0.448) | -51.167 |
| <b>Prokoph (Early Triassic -recent): temperate palaeotemperatures</b> |              |       |                   |         |                     |       |                   |         |           |       |                   |         |                     |       |                   |         |
| N                                                                     | Maximum size |       |                   |         |                     |       |                   |         | Mean size |       |                   |         |                     |       |                   |         |
|                                                                       | GLS          |       |                   |         | OLS (untransformed) |       |                   |         | GLS       |       |                   |         | OLS (untransformed) |       |                   |         |
|                                                                       | Phi          | Int.  | Slope             | AIC     | R <sup>2</sup>      | Int.  | Slope             | AIC     | Phi       | Int.  | Slope             | AIC     | R <sup>2</sup>      | Int.  | Slope             | AIC     |
| 17                                                                    | 0.708        | 2.423 | 0.079<br>(0.059)  | -23.953 | -0.066              | 2.398 | -0.002<br>(0.955) | -16.916 | 0.758     | 2.273 | 0.022<br>(0.058)  | -66.294 | -0.027              | 2.273 | 0.011<br>(0.463)  | -56.901 |
| <b>Zachos (Late Cretaceous - recent): global palaeotemperatures</b>   |              |       |                   |         |                     |       |                   |         |           |       |                   |         |                     |       |                   |         |
| N                                                                     | Maximum size |       |                   |         |                     |       |                   |         | Mean size |       |                   |         |                     |       |                   |         |
|                                                                       | GLS          |       |                   |         | OLS (untransformed) |       |                   |         | GLS       |       |                   |         | OLS (untransformed) |       |                   |         |
|                                                                       | Phi          | Int.  | Slope             | AIC     | R <sup>2</sup>      | Int.  | Slope             | AIC     | Phi       | Int.  | Slope             | AIC     | R <sup>2</sup>      | Int.  | Slope             | AIC     |
| 10                                                                    | -0.143       | 2.422 | -0.045<br>(0.054) | -21.432 | 0.22                | 2.417 | -0.042<br>(0.096) | -23.261 | 0.627     | 2.252 | -0.006<br>(0.654) | -39.327 | -0.088              | 2.241 | 0.005<br>(0.617)  | -38.084 |

Table S6. Results of regressions of body size proxy (maximum and mean log-transformed DCL, using only marine species in the dataset) on the palaeotemperature proxies ( $\delta^{18}\text{O}$  data for tropical and temperate regions from Prokoph *et al.* (2008), and global  $\delta^{18}\text{O}$  data from Zachos *et al.* (2008)). Possible correlation was analysed using generalised least squares (GLS) regressions, incorporating a first-order autoregressive model, as well as ordinary least squares (OLS) regressions using untransformed data (assuming no serial correlation). \*Significant at alpha = 0.05.

| <b>Prokoph (Early Triassic -recent): tropical palaeotemperatures</b>  |              |       |                   |         |                     |       |                   |         |           |       |                   |         |                     |       |                   |         |
|-----------------------------------------------------------------------|--------------|-------|-------------------|---------|---------------------|-------|-------------------|---------|-----------|-------|-------------------|---------|---------------------|-------|-------------------|---------|
| N                                                                     | Maximum size |       |                   |         |                     |       |                   |         | Mean size |       |                   |         |                     |       |                   |         |
|                                                                       | GLS          |       |                   |         | OLS (untransformed) |       |                   |         | GLS       |       |                   |         | OLS (untransformed) |       |                   |         |
|                                                                       | Phi          | Int.  | Slope             | AIC     | R <sup>2</sup>      | Int.  | Slope             | AIC     | Phi       | Int.  | Slope             | AIC     | R <sup>2</sup>      | Int.  | Slope             | AIC     |
| 18                                                                    | 0.601        | 2.936 | -0.01<br>(0.714)  | -35.977 | -0.052              | 2.932 | -0.015<br>(0.705) | -31.507 | 0.752     | 2.82  | -0.015<br>(0.545) | -39.362 | -0.004              | 2.862 | 0.04<br>(0.35)    | -29.321 |
| <b>Prokoph (Early Triassic -recent): temperate palaeotemperatures</b> |              |       |                   |         |                     |       |                   |         |           |       |                   |         |                     |       |                   |         |
| N                                                                     | Maximum size |       |                   |         |                     |       |                   |         | Mean size |       |                   |         |                     |       |                   |         |
|                                                                       | GLS          |       |                   |         | OLS (untransformed) |       |                   |         | GLS       |       |                   |         | OLS (untransformed) |       |                   |         |
|                                                                       | Phi          | Int.  | Slope             | AIC     | R <sup>2</sup>      | Int.  | Slope             | AIC     | Phi       | Int.  | Slope             | AIC     | R <sup>2</sup>      | Int.  | Slope             | AIC     |
| 18                                                                    | 0.449        | 2.984 | 0.055*<br>(0.028) | -40.881 | 0.335               | 2.996 | 0.071*<br>(0.006) | -39.789 | 0.657     | 2.865 | 0.052*<br>(0.016) | -45.475 | 0.471               | 2.878 | 0.09*<br>(0.0009) | -40.862 |
| <b>Zachos (Late Cretaceous - recent): global palaeotemperatures</b>   |              |       |                   |         |                     |       |                   |         |           |       |                   |         |                     |       |                   |         |
| N                                                                     | Maximum size |       |                   |         |                     |       |                   |         | Mean size |       |                   |         |                     |       |                   |         |
|                                                                       | GLS          |       |                   |         | OLS (untransformed) |       |                   |         | GLS       |       |                   |         | OLS (untransformed) |       |                   |         |
|                                                                       | Phi          | Int.  | Slope             | AIC     | R <sup>2</sup>      | Int.  | Slope             | AIC     | Phi       | Int.  | Slope             | AIC     | R <sup>2</sup>      | Int.  | Slope             | AIC     |
| 10                                                                    | 0.208        | 2.906 | 0.042<br>(0.148)  | -20.859 | 0.215               | 2.906 | 0.043<br>(0.099)  | -22.527 | 0.824     | 2.781 | 0.036<br>(0.256)  | -24.953 | 0.692               | 2.715 | 0.092*<br>(0.001) | -25.525 |

Table S7. Results of regressions of body size proxy (maximum and mean log-transformed ODCL, using only non-marine species in the dataset) on the palaeotemperature proxies ( $\delta^{18}\text{O}$  data for tropical and temperate regions from Prokoph *et al.* (2008), and global  $\delta^{18}\text{O}$  data from Zachos *et al.* (2008)). Possible correlation was analysed using generalised least squares (GLS) regressions, incorporating a first-order autoregressive model, as well as ordinary least squares (OLS) regressions using untransformed data (assuming no serial correlation). \*Significant at alpha = 0.05.

| <b>Prokoph (Early Triassic -recent): tropical palaeotemperatures</b>  |              |       |                   |        |                     |       |                  |        |           |       |                   |         |                     |       |                  |         |
|-----------------------------------------------------------------------|--------------|-------|-------------------|--------|---------------------|-------|------------------|--------|-----------|-------|-------------------|---------|---------------------|-------|------------------|---------|
| N                                                                     | Maximum size |       |                   |        |                     |       |                  |        | Mean size |       |                   |         |                     |       |                  |         |
|                                                                       | GLS          |       |                   |        | OLS (untransformed) |       |                  |        | GLS       |       |                   |         | OLS (untransformed) |       |                  |         |
|                                                                       | Phi          | Int.  | Slope             | AIC    | R <sup>2</sup>      | Int.  | Slope            | AIC    | Phi       | Int.  | Slope             | AIC     | R <sup>2</sup>      | Int.  | Slope            | AIC     |
| 26                                                                    | 0.553        | 2.32  | 0.043<br>(0.504)  | 4.843  | 0.011               | 2.366 | 0.075<br>(0.264) | 11.094 | 0.64      | 1.978 | 0.029<br>(0.453)  | -21.012 | 0.049               | 2.023 | 0.065<br>(0.142) | -11.564 |
| <b>Prokoph (Early Triassic -recent): temperate palaeotemperatures</b> |              |       |                   |        |                     |       |                  |        |           |       |                   |         |                     |       |                  |         |
| N                                                                     | Maximum size |       |                   |        |                     |       |                  |        | Mean size |       |                   |         |                     |       |                  |         |
|                                                                       | GLS          |       |                   |        | OLS (untransformed) |       |                  |        | GLS       |       |                   |         | OLS (untransformed) |       |                  |         |
|                                                                       | Phi          | Int.  | Slope             | AIC    | R <sup>2</sup>      | Int.  | Slope            | AIC    | Phi       | Int.  | Slope             | AIC     | R <sup>2</sup>      | Int.  | Slope            | AIC     |
| 23                                                                    | 0.354        | 2.291 | -0.065<br>(0.232) | -6.825 | 0.022               | 2.291 | -0.06<br>(0.232) | -6.129 | 0.523     | 1.947 | -0.042<br>(0.299) | -21.071 | -0.037              | 1.967 | -0.017<br>(0.65) | -17.942 |
| <b>Zachos (Late Cretaceous - recent): global palaeotemperatures</b>   |              |       |                   |        |                     |       |                  |        |           |       |                   |         |                     |       |                  |         |
| N                                                                     | Maximum size |       |                   |        |                     |       |                  |        | Mean size |       |                   |         |                     |       |                  |         |
|                                                                       | GLS          |       |                   |        | OLS (untransformed) |       |                  |        | GLS       |       |                   |         | OLS (untransformed) |       |                  |         |
|                                                                       | Phi          | Int.  | Slope             | AIC    | R <sup>2</sup>      | Int.  | Slope            | AIC    | Phi       | Int.  | Slope             | AIC     | R <sup>2</sup>      | Int.  | Slope            | AIC     |
| 10                                                                    | 0.209        | 2.228 | 0.068<br>(0.366)  | -0.829 | -0.011              | 2.236 | 0.06<br>(0.371)  | -2.397 | -0.157    | 1.964 | 0.06*<br>(0.007)  | -24.96  | 0.502               | 1.965 | 0.06*<br>(0.013) | -26.706 |

Table S8. Results of regressions of body size proxy (maximum and mean log-transformed DCL, using only non-marine species in the dataset) on the palaeotemperature proxies ( $\delta^{18}\text{O}$  data for tropical and temperate regions from Prokoph *et al.* (2008), and global  $\delta^{18}\text{O}$  data from Zachos *et al.* (2008)). Possible correlation was analysed using generalised least squares (GLS) regressions, incorporating a first-order autoregressive model, as well as ordinary least squares (OLS) regressions using untransformed data (assuming no serial correlation). \*Significant at alpha = 0.05.

| <b>Prokoph (Early Triassic -recent): tropical palaeotemperatures</b>  |              |       |                   |        |                     |       |                   |        |           |       |                   |         |                     |       |                  |         |
|-----------------------------------------------------------------------|--------------|-------|-------------------|--------|---------------------|-------|-------------------|--------|-----------|-------|-------------------|---------|---------------------|-------|------------------|---------|
| N                                                                     | Maximum size |       |                   |        |                     |       |                   |        | Mean size |       |                   |         |                     |       |                  |         |
|                                                                       | GLS          |       |                   |        | OLS (untransformed) |       |                   |        | GLS       |       |                   |         | OLS (untransformed) |       |                  |         |
|                                                                       | Phi          | Int.  | Slope             | AIC    | R <sup>2</sup>      | Int.  | Slope             | AIC    | Phi       | Int.  | Slope             | AIC     | R <sup>2</sup>      | Int.  | Slope            | AIC     |
| 26                                                                    | 0.563        | 2.753 | 0.024<br>(0.763)  | 15.858 | -0.011              | 2.82  | 0.069<br>(0.406)  | 22.285 | 0.624     | 2.339 | 0.017<br>(0.725)  | -8.74   | -0.018              | 2.366 | 0.04<br>(0.466)  | 0.623   |
| <b>Prokoph (Early Triassic -recent): temperate palaeotemperatures</b> |              |       |                   |        |                     |       |                   |        |           |       |                   |         |                     |       |                  |         |
| N                                                                     | Maximum size |       |                   |        |                     |       |                   |        | Mean size |       |                   |         |                     |       |                  |         |
|                                                                       | GLS          |       |                   |        | OLS (untransformed) |       |                   |        | GLS       |       |                   |         | OLS (untransformed) |       |                  |         |
|                                                                       | Phi          | Int.  | Slope             | AIC    | R <sup>2</sup>      | Int.  | Slope             | AIC    | Phi       | Int.  | Slope             | AIC     | R <sup>2</sup>      | Int.  | Slope            | AIC     |
| 23                                                                    | 0.317        | 2.76  | -0.071<br>(0.312) | 5.801  | 0.003               | 2.762 | -0.066<br>(0.309) | 5.997  | 0.518     | 2.32  | -0.046<br>(0.387) | -7.779  | -0.033              | 2.335 | -0.027<br>(0.6)  | -4.075  |
| <b>Zachos (Late Cretaceous - recent): global palaeotemperatures</b>   |              |       |                   |        |                     |       |                   |        |           |       |                   |         |                     |       |                  |         |
| N                                                                     | Maximum size |       |                   |        |                     |       |                   |        | Mean size |       |                   |         |                     |       |                  |         |
|                                                                       | GLS          |       |                   |        | OLS (untransformed) |       |                   |        | GLS       |       |                   |         | OLS (untransformed) |       |                  |         |
|                                                                       | Phi          | Int.  | Slope             | AIC    | R <sup>2</sup>      | Int.  | Slope             | AIC    | Phi       | Int.  | Slope             | AIC     | R <sup>2</sup>      | Int.  | Slope            | AIC     |
| 10                                                                    | -0.083       | 2.633 | 0.095<br>(0.172)  | 0.504  | 0.104               | 2.633 | 0.096<br>(0.189)  | -1.426 | -0.089    | 2.345 | 0.07*<br>(0.027)  | -16.045 | 0.376               | 2.346 | 0.07*<br>(0.034) | -18.272 |

Table S9. Results of regressions of body size proxy (maximum and mean log-transformed ODCL, using only crocodylian species in the dataset) on the palaeotemperature proxies (global  $\delta^{18}\text{O}$  data from Zachos *et al.* (2008), from the Late Cretaceous to Recent). Possible correlation was analysed using generalised least squares (GLS) regressions, incorporating a first-order autoregressive model, as well as ordinary least squares (OLS) regressions using untransformed data (assuming no serial correlation). \*Significant at alpha = 0.05.

| <b>Zachos (Late Cretaceous - recent): global palaeotemperatures</b> |              |       |                   |                     |                |           |                   |         |        |                     |                    |         |                |       |                  |         |
|---------------------------------------------------------------------|--------------|-------|-------------------|---------------------|----------------|-----------|-------------------|---------|--------|---------------------|--------------------|---------|----------------|-------|------------------|---------|
| N                                                                   | Maximum size |       |                   |                     |                | Mean size |                   |         |        |                     |                    |         |                |       |                  |         |
|                                                                     | GLS          |       |                   | OLS (untransformed) |                | GLS       |                   |         |        | OLS (untransformed) |                    |         |                |       |                  |         |
|                                                                     | Phi          | Int.  | Slope             | AIC                 | R <sup>2</sup> | Int.      | Slope             | AIC     | Phi    | Int.                | Slope              | AIC     | R <sup>2</sup> | Int.  | Slope            | AIC     |
| 10                                                                  | 0.19         | 2.133 | 0.121*<br>(0.017) | -11.989             | 0.554          | 2.124     | 0.127*<br>(0.008) | -13.662 | -0.297 | 1.98                | 0.075*<br>(0.0003) | -29.953 | 0.698          | 1.987 | 0.07*<br>(0.001) | -31.137 |

Table S10. Results of regressions of body size proxy (maximum and mean log-transformed DCL, using only crocodylian species in the dataset) on the palaeotemperature proxies (global  $\delta^{18}\text{O}$  data from Zachos *et al.* (2008), from the Late Cretaceous to Recent). Possible correlation was analysed using generalised least squares (GLS) regressions, incorporating a first-order autoregressive model, as well as ordinary least squares (OLS) regressions using untransformed data (assuming no serial correlation). \*Significant at alpha = 0.05.

| <b>Zachos (Late Cretaceous - recent): global palaeotemperatures</b> |              |       |                   |                     |                |           |                   |         |        |                     |                    |         |                |       |                   |         |
|---------------------------------------------------------------------|--------------|-------|-------------------|---------------------|----------------|-----------|-------------------|---------|--------|---------------------|--------------------|---------|----------------|-------|-------------------|---------|
| N                                                                   | Maximum size |       |                   |                     |                | Mean size |                   |         |        |                     |                    |         |                |       |                   |         |
|                                                                     | GLS          |       |                   | OLS (untransformed) |                | GLS       |                   |         |        | OLS (untransformed) |                    |         |                |       |                   |         |
|                                                                     | Phi          | Int.  | Slope             | AIC                 | R <sup>2</sup> | Int.      | Slope             | AIC     | Phi    | Int.                | Slope              | AIC     | R <sup>2</sup> | Int.  | Slope             | AIC     |
| 10                                                                  | -0.215       | 2.618 | 0.165*<br>(0.001) | -10.724             | 0.632          | 2.627     | 0.157*<br>(0.003) | -12.355 | -0.235 | 2.386               | 0.105*<br>(0.0007) | -20.748 | 0.647          | 2.395 | 0.098*<br>(0.003) | -22.325 |

Table S11. Results of regressions of body size proxy (maximum and mean log-transformed ODCL, using only notosuchian species in the dataset) on the palaeotemperature proxies (tropical  $\delta^{18}\text{O}$  data from Prokoph *et al.* (2008), from the Aptian to the Eocene). Possible correlation was analysed using generalised least squares (GLS) regressions, incorporating a first-order autoregressive model, as well as ordinary least squares (OLS) regressions using untransformed data (assuming no serial correlation). \*Significant at alpha = 0.05.

| <b>Prokoph (Aptian - Eocene): tropical palaeotemperatures</b> |              |       |                   |                     |                |           |                   |        |                     |       |                   |         |                |       |                   |         |
|---------------------------------------------------------------|--------------|-------|-------------------|---------------------|----------------|-----------|-------------------|--------|---------------------|-------|-------------------|---------|----------------|-------|-------------------|---------|
| N                                                             | Maximum size |       |                   |                     |                | Mean size |                   |        |                     |       |                   |         |                |       |                   |         |
|                                                               | GLS          |       |                   | OLS (untransformed) |                | GLS       |                   |        | OLS (untransformed) |       |                   |         |                |       |                   |         |
|                                                               | Phi          | Int.  | Slope             | AIC                 | R <sup>2</sup> | Int.      | Slope             | AIC    | Phi                 | Int.  | Slope             | AIC     | R <sup>2</sup> | Int.  | Slope             | AIC     |
| 10                                                            | 0.272        | 2.114 | -0.013<br>(0.812) | -5.557              | -0.115         | 2.118     | -0.014<br>(0.798) | -6.786 | 0.702               | 1.925 | -0.029<br>(0.472) | -11.724 | -0.122         | 1.957 | -0.005<br>(0.904) | -10.071 |

Table S12. Results of regressions of body size proxy (maximum and mean log-transformed DCL, using only notosuchian species in the dataset) on the palaeotemperature proxies (tropical  $\delta^{18}\text{O}$  data from Prokoph *et al.* (2008), from the Aptian to the Eocene). Possible correlation was analysed using generalised least squares (GLS) regressions, incorporating a first-order autoregressive model, as well as ordinary least squares (OLS) regressions using untransformed data (assuming no serial correlation). \*Significant at alpha = 0.05.

| <b>Prokoph (Aptian - Eocene): tropical palaeotemperatures</b> |              |       |                   |                     |                |           |                  |         |                     |       |                 |        |                |       |                   |       |
|---------------------------------------------------------------|--------------|-------|-------------------|---------------------|----------------|-----------|------------------|---------|---------------------|-------|-----------------|--------|----------------|-------|-------------------|-------|
| N                                                             | Maximum size |       |                   |                     |                | Mean size |                  |         |                     |       |                 |        |                |       |                   |       |
|                                                               | GLS          |       |                   | OLS (untransformed) |                | GLS       |                  |         | OLS (untransformed) |       |                 |        |                |       |                   |       |
|                                                               | Phi          | Int.  | Slope             | AIC                 | R <sup>2</sup> | Int.      | Slope            | AIC     | Phi                 | Int.  | Slope           | AIC    | R <sup>2</sup> | Int.  | Slope             | AIC   |
| 10                                                            | 0.06         | 2.622 | -0.014<br>(0.699) | -12.63              | -0.092         | 2.618     | -0.017<br>(0.64) | -14.601 | 0.758               | 2.313 | -0.055<br>(0.3) | -6.073 | -0.123         | 2.355 | -0.005<br>(0.928) | -3.54 |

Table S13. Results of regressions of body size proxy (maximum and mean log-transformed ODCL, using only thalattosuchian species in the dataset) on the palaeotemperature proxies (tropical  $\delta^{18}\text{O}$  data from Prokoph *et al.* (2008), for the Jurassic). Possible correlation was analysed using generalised least squares (GLS) regressions, incorporating a first-order autoregressive model, as well as ordinary least squares (OLS) regressions using untransformed data (assuming no serial correlation). \*Significant at alpha = 0.05.

**Prokoph (Jurassic): tropical palaeotemperatures**

| N | Maximum size |       |                   |        |                     |       |                  |        | Mean size |       |                   |         |                     |       |                   |         |
|---|--------------|-------|-------------------|--------|---------------------|-------|------------------|--------|-----------|-------|-------------------|---------|---------------------|-------|-------------------|---------|
|   | GLS          |       |                   |        | OLS (untransformed) |       |                  |        | GLS       |       |                   |         | OLS (untransformed) |       |                   |         |
|   | Phi          | Int.  | Slope             | AIC    | R <sup>2</sup>      | Int.  | Slope            | AIC    | Phi       | Int.  | Slope             | AIC     | R <sup>2</sup>      | Int.  | Slope             | AIC     |
| 7 | 0.809        | 2.396 | -0.051<br>(0.308) | -5.062 | 0.059               | 2.322 | -0.11<br>(0.292) | -2.309 | -0.184    | 2.224 | -0.038<br>(0.455) | -10.311 | -0.09               | 2.232 | -0.033<br>(0.509) | -12.067 |

**Prokoph (Jurassic): temperate palaeotemperatures**

| N | Maximum size |       |                  |        |                     |       |                  |        | Mean size |       |                   |         |                     |       |                   |         |
|---|--------------|-------|------------------|--------|---------------------|-------|------------------|--------|-----------|-------|-------------------|---------|---------------------|-------|-------------------|---------|
|   | GLS          |       |                  |        | OLS (untransformed) |       |                  |        | GLS       |       |                   |         | OLS (untransformed) |       |                   |         |
|   | Phi          | Int.  | Slope            | AIC    | R <sup>2</sup>      | Int.  | Slope            | AIC    | Phi       | Int.  | Slope             | AIC     | R <sup>2</sup>      | Int.  | Slope             | AIC     |
| 7 | 0.808        | 2.526 | 0.074<br>(0.098) | -7.658 | 0.452               | 2.633 | 0.152<br>(0.058) | -6.096 | -0.369    | 2.366 | 0.082*<br>(0.003) | -22.184 | 0.778               | 2.369 | 0.086*<br>(0.005) | -23.214 |

Table S14. Results of regressions of body size proxy (maximum and mean log-transformed DCL, using only thalattosuchian species in the dataset) on the palaeotemperature proxies (tropical  $\delta^{18}\text{O}$  data from Prokoph *et al.* (2008), for the Jurassic). Possible correlation was analysed using generalised least squares (GLS) regressions, incorporating a first-order autoregressive model, as well as ordinary least squares (OLS) regressions using untransformed data (assuming no serial correlation). \*Significant at alpha = 0.05.

| <b>Prokoph (Jurassic): tropical palaeotemperatures</b>  |              |       |                   |         |                     |       |                   |         |           |       |                   |         |                     |       |                   |         |
|---------------------------------------------------------|--------------|-------|-------------------|---------|---------------------|-------|-------------------|---------|-----------|-------|-------------------|---------|---------------------|-------|-------------------|---------|
| N                                                       | Maximum size |       |                   |         |                     |       |                   |         | Mean size |       |                   |         |                     |       |                   |         |
|                                                         | GLS          |       |                   |         | OLS (untransformed) |       |                   |         | GLS       |       |                   |         | OLS (untransformed) |       |                   |         |
|                                                         | Phi          | Int.  | Slope             | AIC     | R <sup>2</sup>      | Int.  | Slope             | AIC     | Phi       | Int.  | Slope             | AIC     | R <sup>2</sup>      | Int.  | Slope             | AIC     |
| 7                                                       | 0.661        | 2.856 | -0.054<br>(0.176) | -10.26  | 0.192               | 2.814 | -0.088<br>(0.179) | -9.432  | -0.124    | 2.727 | -0.042<br>(0.391) | -10.851 | -0.022              | 2.728 | -0.041<br>(0.394) | -12.753 |
| <b>Prokoph (Jurassic): temperate palaeotemperatures</b> |              |       |                   |         |                     |       |                   |         |           |       |                   |         |                     |       |                   |         |
| N                                                       | Maximum size |       |                   |         |                     |       |                   |         | Mean size |       |                   |         |                     |       |                   |         |
|                                                         | GLS          |       |                   |         | OLS (untransformed) |       |                   |         | GLS       |       |                   |         | OLS (untransformed) |       |                   |         |
|                                                         | Phi          | Int.  | Slope             | AIC     | R <sup>2</sup>      | Int.  | Slope             | AIC     | Phi       | Int.  | Slope             | AIC     | R <sup>2</sup>      | Int.  | Slope             | AIC     |
| 7                                                       | 0.553        | 2.995 | 0.07<br>(0.069)   | -12.556 | 0.563               | 3.046 | 0.107*<br>(0.031) | -13.734 | 0.582     | 2.852 | 0.072<br>(0.056)  | -12.788 | 0.162               | 2.839 | 0.051<br>(0.201)  | -14.155 |



Table S15. Results of regressions of body size proxy (maximum and mean log-transformed ODCL, using only tethysuchian species in the dataset) on the palaeotemperature proxies (tropical  $\delta^{18}\text{O}$  data from Prokoph *et al.* (2008), from the Late Jurassic to the Eocene). Possible correlation was analysed using generalised least squares (GLS) regressions, incorporating a first-order autoregressive model, as well as ordinary least squares (OLS) regressions using untransformed data (assuming no serial correlation). \*Significant at  $\alpha = 0.05$ .

| <b>Prokoph (Late Jurassic – Eocene): tropical palaeotemperatures</b>  |              |       |                    |        |                     |       |                   |        |           |       |                     |        |                     |       |                    |         |
|-----------------------------------------------------------------------|--------------|-------|--------------------|--------|---------------------|-------|-------------------|--------|-----------|-------|---------------------|--------|---------------------|-------|--------------------|---------|
| N                                                                     | Maximum size |       |                    |        |                     |       |                   |        | Mean size |       |                     |        |                     |       |                    |         |
|                                                                       | GLS          |       |                    |        | OLS (untransformed) |       |                   |        | GLS       |       |                     |        | OLS (untransformed) |       |                    |         |
|                                                                       | Phi          | Int.  | Slope              | AIC    | R <sup>2</sup>      | Int.  | Slope             | AIC    | Phi       | Int.  | Slope               | AIC    | R <sup>2</sup>      | Int.  | Slope              | AIC     |
| 13                                                                    | -0.554       | 2.243 | -0.145*<br>(0.004) | -5.113 | 0.138               | 2.288 | -0.108<br>(0.115) | -2.267 | -0.448    | 2.096 | -0.154*<br>(0.0002) | -15.18 | 0.493               | 2.116 | -0.142*<br>(0.004) | -14.409 |
| <b>Prokoph (Late Jurassic – Eocene): temperate palaeotemperatures</b> |              |       |                    |        |                     |       |                   |        |           |       |                     |        |                     |       |                    |         |
| N                                                                     | Maximum size |       |                    |        |                     |       |                   |        | Mean size |       |                     |        |                     |       |                    |         |
|                                                                       | GLS          |       |                    |        | OLS (untransformed) |       |                   |        | GLS       |       |                     |        | OLS (untransformed) |       |                    |         |
|                                                                       | Phi          | Int.  | Slope              | AIC    | R <sup>2</sup>      | Int.  | Slope             | AIC    | Phi       | Int.  | Slope               | AIC    | R <sup>2</sup>      | Int.  | Slope              | AIC     |
| 13                                                                    | -0.223       | 2.276 | -0.142<br>(0.051)  | -1.969 | 0.202               | 2.27  | -0.15<br>(0.069)  | -3.281 | 0.113     | 2.165 | -0.129<br>(0.063)   | -7.028 | 0.226               | 2.163 | -0.127<br>(0.057)  | -8.891  |

Table S16. Results of regressions of body size proxy (maximum and mean log-transformed DCL, using only tethysuchian species in the dataset) on the palaeotemperature proxies (tropical  $\delta^{18}\text{O}$  data from Prokoph *et al.* (2008), from the Late Jurassic to the Eocene). Possible correlation was analysed using generalised least squares (GLS) regressions, incorporating a first-order autoregressive model, as well as ordinary least squares (OLS) regressions using untransformed data (assuming no serial correlation). \*Significant at alpha = 0.05.

| <b>Prokoph (Late Jurassic – Eocene): tropical palaeotemperatures</b>  |              |       |                   |         |                     |       |                  |         |           |       |                   |         |                     |       |                   |         |
|-----------------------------------------------------------------------|--------------|-------|-------------------|---------|---------------------|-------|------------------|---------|-----------|-------|-------------------|---------|---------------------|-------|-------------------|---------|
| N                                                                     | Maximum size |       |                   |         |                     |       |                  |         | Mean size |       |                   |         |                     |       |                   |         |
|                                                                       | GLS          |       |                   |         | OLS (untransformed) |       |                  |         | GLS       |       |                   |         | OLS (untransformed) |       |                   |         |
|                                                                       | Phi          | Int.  | Slope             | AIC     | R <sup>2</sup>      | Int.  | Slope            | AIC     | Phi       | Int.  | Slope             | AIC     | R <sup>2</sup>      | Int.  | Slope             | AIC     |
| 12                                                                    | 0.53         | 3.02  | -0.004<br>(0.914) | -11.772 | -0.061              | 2.993 | -0.03<br>(0.559) | -10.039 | 0.483     | 2.848 | -0.045<br>(0.327) | -10.28  | 0.075               | 2.814 | -0.07<br>(0.198)  | -9.441  |
| <b>Prokoph (Late Jurassic – Eocene): temperate palaeotemperatures</b> |              |       |                   |         |                     |       |                  |         |           |       |                   |         |                     |       |                   |         |
| N                                                                     | Maximum size |       |                   |         |                     |       |                  |         | Mean size |       |                   |         |                     |       |                   |         |
|                                                                       | GLS          |       |                   |         | OLS (untransformed) |       |                  |         | GLS       |       |                   |         | OLS (untransformed) |       |                   |         |
|                                                                       | Phi          | Int.  | Slope             | AIC     | R <sup>2</sup>      | Int.  | Slope            | AIC     | Phi       | Int.  | Slope             | AIC     | R <sup>2</sup>      | Int.  | Slope             | AIC     |
| 12                                                                    | 0.528        | 2.941 | -0.08<br>(0.15)   | -14.367 | 0.105               | 2.941 | -0.083<br>(0.16) | -12.088 | 0.503     | 2.799 | -0.105<br>(0.081) | -12.934 | 0.221               | 2.782 | -0.114<br>(0.069) | -11.507 |

*Palaeolatitude*

Table S17. Results of regressions of log-transformed body length proxy (using all species in the ODCL cranial measurement dataset) on the palaeolatitudinal data. Possible correlation was analysed using ordinary least squares (OLS) and phylogenetic generalised least squares (PGLS) regressions. \*Significant at alpha = 0.05.

| N   | OLS            |           |                |        | PGLS           |           |                |         |
|-----|----------------|-----------|----------------|--------|----------------|-----------|----------------|---------|
|     | R <sup>2</sup> | Intercept | Slope          | AIC    | R <sup>2</sup> | Intercept | Slope          | AIC     |
| 195 | 0.013          | 2.13      | -0.002 (0.059) | 43.284 | 0.003          | 1.77      | -0.001 (0.194) | -39.972 |

Table S18. Results of regressions of log-transformed body length proxy (using all species in the DCL cranial measurement dataset) on the palaeolatitudinal data. Possible correlation was analysed using ordinary least squares (OLS) and phylogenetic generalised least squares (PGLS) regressions. \*Significant at alpha = 0.05.

| N   | OLS            |           |                 |        | PGLS           |           |                 |         |
|-----|----------------|-----------|-----------------|--------|----------------|-----------|-----------------|---------|
|     | R <sup>2</sup> | Intercept | Slope           | AIC    | R <sup>2</sup> | Intercept | Slope           | AIC     |
| 178 | 0.022          | 2.595     | -0.004* (0.024) | 150.74 | 0.019          | 2.195     | -0.002* (0.034) | -19.379 |

Table S19. Results of regressions of log-transformed body length proxy (using only marine species in the ODCL cranial measurement dataset) on the palaeolatitudinal data. Possible correlation was analysed using ordinary least squares (OLS) and phylogenetic generalised least squares (PGLS) regressions. \*Significant at alpha = 0.05.

| N  | OLS            |           |                 |         | PGLS           |           |                |         |
|----|----------------|-----------|-----------------|---------|----------------|-----------|----------------|---------|
|    | R <sup>2</sup> | Intercept | Slope           | AIC     | R <sup>2</sup> | Intercept | Slope          | AIC     |
| 48 | -0.019         | 2.289     | -0.0008 (0.739) | -21.925 | 0.035          | 2.289     | -0.003 (0.105) | -36.771 |

Table S20. Results of regressions of log-transformed body length proxy (using only marine species in the DCL cranial measurement dataset) on the palaeolatitudinal data. Possible correlation was analysed using ordinary least squares (OLS) and phylogenetic generalised least squares (PGLS) regressions. \*Significant at alpha = 0.05.

| N  | OLS            |           |                |         | PGLS           |           |              |         |
|----|----------------|-----------|----------------|---------|----------------|-----------|--------------|---------|
|    | R <sup>2</sup> | Intercept | Slope          | AIC     | R <sup>2</sup> | Intercept | Slope        | AIC     |
| 43 | 0.014          | 2.873     | -0.002 (0.211) | -28.625 | -0.014         | 2.662     | 0.001 (0.53) | -45.625 |

Table S21. Results of regressions of log-transformed body length proxy (using only non-marine species in the ODCL cranial measurement dataset) on the palaeolatitudinal data. Possible correlation was analysed using ordinary least squares (OLS) and phylogenetic generalised least squares (PGLS) regressions. \*Significant at alpha = 0.05.

| N   | OLS            |           |                |        | PGLS           |           |                 |         |
|-----|----------------|-----------|----------------|--------|----------------|-----------|-----------------|---------|
|     | R <sup>2</sup> | Intercept | Slope          | AIC    | R <sup>2</sup> | Intercept | Slope           | AIC     |
| 147 | 0.037          | 2.09      | -0.003* (0.01) | 14.567 | 0.028          | 1.836     | -0.002* (0.023) | -48.394 |

Table S22. Results of regressions of log-transformed body length proxy (using only non-marine species in the DCL cranial measurement dataset) on the palaeolatitudinal data. Possible correlation was analysed using ordinary least squares (OLS) and phylogenetic generalised least squares (PGLS) regressions. \*Significant at alpha = 0.05.

| N   | OLS            |           |                 |         | PGLS           |           |                 |        |
|-----|----------------|-----------|-----------------|---------|----------------|-----------|-----------------|--------|
|     | R <sup>2</sup> | Intercept | Slope           | AIC     | R <sup>2</sup> | Intercept | Slope           | AIC    |
| 135 | 0.036          | 2.508     | -0.005* (0.014) | 102.424 | 0.06           | 2.259     | -0.004* (0.002) | 13.242 |

Table S23. Results of regressions of log-transformed body length proxy (using only crocodylian species in the ODCL cranial measurement dataset) on the palaeolatitudinal data. Possible correlation was analysed using ordinary least squares (OLS) and phylogenetic generalised least squares (PGLS) regressions. \*Significant at alpha = 0.05.

| N  | OLS            |           |                  |         | PGLS           |           |                |         |
|----|----------------|-----------|------------------|---------|----------------|-----------|----------------|---------|
|    | R <sup>2</sup> | Intercept | Slope            | AIC     | R <sup>2</sup> | Intercept | Slope          | AIC     |
| 70 | 0.175          | 2.265     | -0.004* (0.0001) | -49.408 | 0.034          | 2.194     | -0.002 (0.066) | -46.782 |

Table S24. Results of regressions of log-transformed body length proxy (using only crocodylian species in the DCL cranial measurement dataset) on the palaeolatitudinal data. Possible correlation was analysed using ordinary least squares (OLS) and phylogenetic generalised least squares (PGLS) regressions. \*Significant at alpha = 0.05.

| N  | OLS            |           |                  |       | PGLS           |           |               |        |
|----|----------------|-----------|------------------|-------|----------------|-----------|---------------|--------|
|    | R <sup>2</sup> | Intercept | Slope            | AIC   | R <sup>2</sup> | Intercept | Slope         | AIC    |
| 64 | 0.178          | 2.81      | -0.007* (0.0003) | 8.976 | 0.045          | 2.744     | -0.004 (0.05) | -6.629 |

Table S25. Results of regressions of log-transformed body length proxy (using only notosuchian species in the ODCL cranial measurement dataset) on the palaeolatitudinal data. Possible correlation was analysed using ordinary least squares (OLS) and phylogenetic generalised least squares (PGLS) regressions. \*Significant at alpha = 0.05.

| N  | OLS            |           |               |        | PGLS           |           |                 |         |
|----|----------------|-----------|---------------|--------|----------------|-----------|-----------------|---------|
|    | R <sup>2</sup> | Intercept | Slope         | AIC    | R <sup>2</sup> | Intercept | Slope           | AIC     |
| 34 | 0.012          | 1.849     | 0.003 (0.245) | -8.644 | -0.031         | 1.821     | -0.0001 (0.951) | -20.185 |

Table S26. Results of regressions of log-transformed body length proxy (using only notosuchian species in the DCL cranial measurement dataset) on the palaeolatitudinal data. Possible correlation was analysed using ordinary least squares (OLS) and phylogenetic generalised least squares (PGLS) regressions. \*Significant at alpha = 0.05.

| N  | OLS            |           |                |        | PGLS           |           |                |        |
|----|----------------|-----------|----------------|--------|----------------|-----------|----------------|--------|
|    | R <sup>2</sup> | Intercept | Slope          | AIC    | R <sup>2</sup> | Intercept | Slope          | AIC    |
| 30 | -0.035         | 2.26      | 0.0002 (0.945) | 14.931 | 0.035          | 2.274     | -0.005 (0.162) | -4.677 |

Table S27. Results of regressions of log-transformed body length proxy (using only thalattosuchian species in the ODCL cranial measurement dataset) on the palaeolatitudinal data. Possible correlation was analysed using ordinary least squares (OLS) and phylogenetic generalised least squares (PGLS) regressions. \*Significant at alpha = 0.05.

| N  | OLS            |           |               |        | PGLS           |           |                 |         |
|----|----------------|-----------|---------------|--------|----------------|-----------|-----------------|---------|
|    | R <sup>2</sup> | Intercept | Slope         | AIC    | R <sup>2</sup> | Intercept | Slope           | AIC     |
| 30 | -0.019         | 2.115     | 0.004 (0.509) | -4.607 | -0.035         | 2.156     | -0.0001 (0.977) | -19.849 |

Table S28. Results of regressions of log-transformed body length proxy (using only thalattosuchian species in the DCL cranial measurement dataset) on the palaeolatitudinal data. Possible correlation was analysed using ordinary least squares (OLS) and phylogenetic generalised least squares (PGLS) regressions. \*Significant at alpha = 0.05.

| N  | OLS            |           |               |         | PGLS           |           |               |         |
|----|----------------|-----------|---------------|---------|----------------|-----------|---------------|---------|
|    | R <sup>2</sup> | Intercept | Slope         | AIC     | R <sup>2</sup> | Intercept | Slope         | AIC     |
| 26 | -0.004         | 2.579     | 0.004 (0.357) | -14.111 | 0.01           | 2.601     | 0.003 (0.273) | -28.503 |

Table S29. Results of regressions of log-transformed body length proxy (using only tethysuchian species in the ODCL cranial measurement dataset) on the palaeolatitudinal data. Possible correlation was analysed using ordinary least squares (OLS) and phylogenetic generalised least squares (PGLS) regressions. \*Significant at alpha = 0.05.

| N  | OLS            |           |                 |        | PGLS           |           |                 |        |
|----|----------------|-----------|-----------------|--------|----------------|-----------|-----------------|--------|
|    | R <sup>2</sup> | Intercept | Slope           | AIC    | R <sup>2</sup> | Intercept | Slope           | AIC    |
| 16 | 0.251          | 2.468     | -0.009* (0.027) | -5.781 | 0.444          | 2.54      | -0.012* (0.002) | -6.853 |

Table S30. Results of regressions of log-transformed body length proxy (using only tethysuchian species in the DCL cranial measurement dataset) on the palaeolatitudinal data. Possible correlation was analysed using ordinary least squares (OLS) and phylogenetic generalised least squares (PGLS) regressions. \*Significant at alpha = 0.05.

| N  | OLS            |           |                |        | PGLS           |           |               |        |
|----|----------------|-----------|----------------|--------|----------------|-----------|---------------|--------|
|    | R <sup>2</sup> | Intercept | Slope          | AIC    | R <sup>2</sup> | Intercept | Slope         | AIC    |
| 14 | -0.002         | 2.898     | -0.004 (0.345) | -1.387 | -0.084         | 2.904     | 0.001 (0.729) | -2.537 |

## Supplementary references

- Andrade MB, Edmonds R, Benton MJ, Schouten R. **2011**. A new Berriasian species of *Goniopholis* (Mesoeucrocodylia, Neosuchia) from England, and a review of the genus. *Zoological Journal of the Linnean Society*, 163S1, S66–S108.
- Bapst DW. **2012**. paleotree: an R package for paleontological and phylogenetic analyses of evolution. *Methods in Ecology and Evolution*, 3(5), 803–07.
- Bapst DW. **2013**. A stochastic rate  $\square$ calibrated method for time  $\square$ scaling phylogenies of fossil taxa. *Methods in Ecology and Evolution*, 4(8), 724–33.
- Bapst DW. **2014**. Preparing paleontological datasets for phylogenetic comparative methods. In: Garamszegi LZ (ed.) *Modern phylogenetic comparative methods and their application in evolutionary biology*. Berlin: Springer. p. 515–44.
- Bapst DW. **2014**. Assessing the effect of time-scaling methods on phylogeny-based analyses in the fossil record. *Paleobiology*, 40(3), 331–51.
- Bates KT, Manning PL, Hodgetts D, Sellers WI. **2009**. Estimating mass properties of dinosaurs using laser imaging and 3D computer modelling. *PLoS One*, 4, e4532.
- Benson RBJ, Campione NE, Carrano MT, Mannion PD, Sullivan C, Upchurch P, Evans DC. **2014**. Rates of dinosaur body mass evolution indicate 170 million years of sustained ecological innovation on the avian stem lineage. *PLoS Biology*, 12(5), e1001853.
- Benson RBJ, Hunt G, Carrano MT, Campione N. **2018**. Cope's rule and the adaptive landscape of dinosaur body size evolution. *Palaeontology*, 61(1), 13–48.
- Brochu CA. **2012**. Phylogenetic relationships of Palaeogene ziphodont eusuchians and the status of *Pristichampsus* Gervais, 1853. *Earth and Environmental Science Transactions of the Royal Society of Edinburgh*, 103(3-4), 521–550.
- Brochu CA, Parris DC, Grandstaff BS, Denton Jr RK, Gallagher WB. **2012**. A new species of *Borealosuchus* (Crocodyliformes, Eusuchia) from the Late Cretaceous–early Paleogene of New Jersey. *Journal of Vertebrate Paleontology*, 32(1), 105–116.
- Brocklehurst N. **2017**. Rates of morphological evolution in Captorhinidae: an adaptive radiation of Permian herbivores. *PeerJ*, 5, e3200.
- Bronzati M, Montefeltro FC, Langer MC. **2015**. Diversification events and the effects of mass extinctions on Crocodyliformes evolutionary history. *Royal Society Open Science*, 2, 140385.
- Buscalioni ÁD. **2017**. The Gobiosuchidae in the early evolution of Crocodyliformes. *Journal of Vertebrate Paleontology*, 37(3), e1324459.



- Bustard HR, Singh LAK. **1977**. Studies on the Indian Gharial *Gavialis gangeticus* (Gmelin) (Reptilia, Crocodylia) – I: Estimation of body length from scute length. *Indian Forester*, 103(2), 140–149.
- Campione NE, Evans DC. **2012**. A universal scaling relationship between body mass and proximal limb bone dimensions in quadrupedal terrestrial tetrapods. *BMC Biology*, 10(1), 60.
- Carballido JL, Pol D, Otero A, Cerda IA, Salgado L, Garrido AC, Ramezani J, Cúneo NR, Krause JM. **2017**. A new giant titanosaur sheds light on body mass evolution among sauropod dinosaurs. *Proceedings of the Royal Society B: Biological Sciences*, 284(1860), 20171219.
- Clark JM. **1994**. Patterns of evolution in Mesozoic Crocodyliformes. In: Fraser NC, Sues HD (eds.) *In the Shadow of Dinosaurs*. Cambridge: Cambridge University Press. p. 84–97.
- Clark JM. **2011**. A new shartegosuchid crocodyliform from the Upper Jurassic Morrison Formation of western Colorado. *Zoological Journal of the Linnean Society*, 163S1, S152–S172.
- Colbert EH. **1962**. The weights of dinosaurs. *American Museum Novitates*, (2076), 1–16.
- Currie PJ. **1978**. The orthometric linear unit. *Journal of Paleontology*, 52, 964–971.
- Farlow JO, Hurlburt GR, Elsey RM, Britton AR, Langston W. **2005**. Femoral dimensions and body size of *Alligator mississippiensis*: estimating the size of extinct mesoeucrocodylians. *Journal of Vertebrate Paleontology*, 25(2), 354–369.
- Godoy PL, Bronzati M, Eltink E, Marsola JCA, Cidade GM, Langer MC, Montefeltro FC. **2016**. Postcranial anatomy of *Pissarrachampsia sera* (Crocodyliformes, Baurusuchidae) from the Late Cretaceous of Brazil: insights on lifestyle and phylogenetic significance. *PeerJ*, 4, e2075.
- Hastings AK, Bloch JI, Jaramillo CA. **2015**. A new blunt-snouted dyrosaurid, *Anthracosuchus balrogus* gen. et sp. nov. (Crocodylomorpha, Mesoeucrocodylia), from the Palaeocene of Colombia. *Historical Biology*, 27(8), 998–1020.
- Hedman MM. **2010**. Constraints on clade ages from fossil outgroups. *Paleobiology*, 36(1), 16–31.
- Herrera Y, Gasparini Z, Fernández MS. **2015**. *Purranisaurus potens* Rusconi, an enigmatic metriorhynchid from the Late Jurassic–Early Cretaceous of the Neuquén Basin. *Journal of Vertebrate Paleontology*, 35(2), e904790.
- Hall PM, Portier KM. **1994**. Cranial morphometry of New Guinea crocodiles (*Crocodylus novaeguineae*): ontogenetic variation in relative growth of the skull and an assessment of its

- utility as a predictor of the sex and size of individuals. *Herpetological Monographs*, 203–225.
- Hurlburt G. **1999**. Comparison of body mass estimation techniques, using recent reptiles and the pelycosaur *Edaphosaurus boanerges*. *Journal of Vertebrate Paleontology*, 19(2), 338–350.
- Hurlburt GR, Heckert AB, Farlow JO. **2003**. Body mass estimates of phytosaurs (Archosauria: Parasuchidae) from the Petrified Forest Formation (Chinle Group: Revueltian) based on skull and limb bone measurements. *New Mexico Museum of Natural History and Science Bulletins*, 24, 105–13.
- Laurin M. **2004**. The evolution of body size, Cope's rule and the origin of amniotes. *Systematic Biology*, 53(4), 594–622.
- Leardi JM, Pol D, Clark JM. **2017**. Detailed anatomy of the braincase of *Macelognathus vagans* Marsh, 1884 (Archosauria, Crocodylomorpha) using high resolution tomography and new insights on basal crocodylomorph phylogeny. *PeerJ*, 5, e2801.
- Lloyd GT, Bapst DW, Friedman M, Davis KE. **2016**. Probabilistic divergence time estimation without branch lengths: dating the origins of dinosaurs, avian flight and crown birds. *Biology letters*, 12(11), 20160609.
- Maddison WP, Maddison DR. **2018**. Mesquite: a modular system for evolutionary analysis. Version 3.40. <http://mesquiteproject.org>
- Martin JE, De'lfino M, Smith T. **2016**. Osteology and affinities of Dollo's goniopholidid (Mesoeucrocodylia) from the Early Cretaceous of Bernissart, Belgium. *Journal of Vertebrate Paleontology*, 36(6), e1222534.
- Meunier LMV, Larsson HCE. **2017**. Revision and phylogenetic affinities of *Elosuchus* (Crocodyliformes). *Zoological Journal of the Linnean Society*, 179, 169–200.
- Montefeltro FC, Larsson HCE, França, MAG, Langer MC. **2013**. A new neosuchian with Asian affinities from the Jurassic of northeastern Brazil. *Naturwissenschaften*, 100(9), 835–841.
- Motani R. **2001**. Estimating body mass from silhouettes: testing the assumption of elliptical body cross-sections. *Paleobiology*, 27, 735–50.
- Narváez I, Brochu CA, Escaso F, Pérez-García A, Ortega F. **2015**. New Crocodyliforms from Southwestern Europe and Definition of a Diverse Clade of European Late Cretaceous Basal Eusuchians. *PLoS ONE*, 10(11), e0140679.
- Platt SG, Rainwater TR, Thorbjarnarson JB, Finger AG, Anderson TA, McMurry ST. **2009**. Size estimation, morphometrics, sex ratio, sexual size dimorphism, and biomass of Morelet's crocodile in northern Belize. *Caribbean Journal of Science*, 45(1), 80–94.

- Platt SG, Rainwater TR, Thorbjarnarson JB, Martin D. **2011**. Size estimation, morphometrics, sex ratio, sexual size dimorphism, and biomass of *Crocodylus acutus* in the coastal zone of Belize. *Salamandra*; 47, 179–92.
- Pol D, Gasparini Z. **2009**. Skull anatomy of *Dakosaurus andiniensis* (Thalattosuchia: Crocodylomorpha) and the phylogenetic position of Thalattosuchia. *Journal of Systematic Palaeontology*, 7(2), 163–197.
- Pol D, Leardi JM, Lecuona A, Krause M. **2012**. Postcranial anatomy of *Sebecus icaeorhinus* (Crocodyliformes, Sebecidae) from the Eocene of Patagonia. *Journal of Vertebrate Paleontology*, 32(2), 328–354.
- Pol D, Rauhut OWM, Lecuona A, Leardi JM, Xu X, Clark JM. **2013**. A new fossil from the Jurassic of Patagonia reveals the early basicranial evolution and the origins of Crocodyliformes. *Biological Reviews*. 88, 862–872.
- Pol D, Nascimento PM, Carvalho AB, Riccomini C, Pires-Domingues RA, Zaher H. **2014**. A New Notosuchian from the Late Cretaceous of Brazil and the Phylogeny of Advanced Notosuchians. *PLoS ONE*, 9(4), e93105.
- R Core Team. **2018**. R: a language and environment for statistical computing. Vienna: R Foundation for Statistical Computing. <https://www.R-project.org/>.
- Ristevski J, Young MT, Andrade MB, Hastings AK. **2018**. A new species of *Anteophthalmosuchus* (Crocodylomorpha, Goniopholididae) from the Lower Cretaceous of the Isle of Wight, United Kingdom, and a review of the genus. *Cretaceous Research*, 84, 340–383.
- Romer AS, Price LW. **1940**. Review of the Pelycosauria. *Geological Society of America Special Papers*, 28, 1–534.
- Scheyer TM, Aguilera OA, Delfino M, Fortier DC, Carlini AA, Sánchez R, Carrillo-Briceño JD, Quiroz L, Sánchez-Villagra MR. **2013**. Crocodylian diversity peak and extinction in the late Cenozoic of the northern Neotropics. *Nature communications*, 4, 1907.
- Schwarz D, Raddatz M, Wings O. **2017**. *Knoetschkesuchus langenbergensis* gen. nov. sp. nov., a new atoposaurid crocodyliform from the Upper Jurassic Langenberg Quarry (Lower Saxony, northwestern Germany), and its relationships to Theriosuchus. *PLoS ONE*, 12(2), e0160617.
- Sellers WI, Hepworth-Bell J, Falkingham PL, Bates KT, Brassey CA, Egerton VM, Manning PL. **2012**. Minimum convex hull mass estimations of complete mounted skeletons. *Biology Letters*, 8(5), 842–845.
- Sereno PC, Larsson HC, Sidor CA, Gado B. **2001**. The giant crocodyliform *Sarcosuchus* from the Cretaceous of Africa. *Science*, 294(5546), 1516–1519.

- Tennant JP, Mannion PD, Upchurch P. **2016**. Evolutionary relationships and systematics of Atoposauridae (Crocodylomorpha: Neosuchia): implications for the rise of Eusuchia. *Zoological Journal of the Linnean Society*, 177(4), 854–936.
- Turner AH. **2015**. A review of *Shamosuchus* and *Paralligator* (Crocodyliformes, Neosuchia) from the Cretaceous of Asia. *PLoS ONE*, 10(2), e0118116.
- Turner AH, Pritchard AC. **2015**. The monophyly of Susisuchidae (Crocodyliformes) and its phylogenetic placement in Neosuchia. *PeerJ*, 3, e759.
- Webb GJW, Messel H. **1978**. Morphometric analysis of *Crocodylus porosus* from the north coast of Arnhem Land, northern Australia. *Australian Journal of Zoology*, 26(1), 1–27.
- Wilberg E. **2015**. What's in an Outgroup? The Impact of Outgroup Choice on the Phylogenetic Position of Thalattosuchia (Crocodylomorpha) and the Origin of Crocodyliformes. *Systematic Biology*, 64(4), 621–37.
- Young MT. **2014**. Filling the “Corallian Gap”: re-description of a metriorhynchid crocodylomorph from the Oxfordian (Late Jurassic) of Headington, England. *Historical Biology*, 26, 80–90.
- Young MT, Bell MA, Andrade MB, Brusatte SL. **2011**. Body size estimation and evolution in metriorhynchid crocodylomorphs: implications for species diversification and niche partitioning. *Zoological Journal of the Linnean Society*, 163(4), 1199–1216.
- Young MT, Rabi M, Bell MA, Foffa, D, Steel L, Sachs S, Peyer K. **2016**. Big-headed marine crocodyliforms and why we must be cautious when using extant species as body length proxies for long-extinct relatives. *Palaeontologia Electronica*, 19(3), 1–14.
- Young MT, Hastings AK, Allain R, Smith TJ. **2017**. Revision of the enigmatic crocodyliform *Elosuchus felixi* de Lapparent de Broin, 2002 from the Lower-Upper Cretaceous boundary of Niger: potential evidence for an early origin of the clade Dyrosauridae. *Zoological Journal of the Linnean Society*, 179, 377–403.
